# Supplementary material
Source: PubMed Central journal article supplement (PMC3168723)
Supplement: NIHMS320103-supplement-1_si_001.pdf [file NIHMS320103-supplement-1_si_001.pdf]

# ***Assessing Helical Protein Interfaces for Inhibitor Design***

Brooke N. Bullock, Andrea L. Jochim and Paramjit S. Arora\*

*Department of Chemistry, New York University, New York, New York 10003*

## **Supporting Information**

|                                                                                   | Page |
|-----------------------------------------------------------------------------------|------|
| Description of methods                                                            | S2   |
| <b>Figures S2 and S3</b>                                                          | S5   |
| Supplementary references                                                          | S6   |
| <b>Table S1.</b> Dataset of HIP interactions with hotspots on one helical face    | S7   |
| <b>Table S2.</b> Dataset of HIP interactions with hotspots on two helical faces   | S38  |
| <b>Table S3.</b> Dataset of HIP interactions with hotspots on three helical faces | S54  |

## Methods used to Identify Helical Interfaces in Protein-Protein (HIPP) Interactions

Protein structures were obtained from the Protein Data Bank (<http://www.pdb.org/>). In addition to using Rosetta, we wrote computer code in Perl, C and C++ programming language to identify and analyze HIPP interactions. The key steps to identifying HIPP interactions are listed below and shown in Figure S1.

1) Using the advanced search function on the PDB website, we extract all structures with more than one protein entity.

2) Sequence alignment of all complexes was performed using the CD-HIT clustering algorithm. CD-HIT clusters similar chains according to a similarity threshold. Although this method allows for all unique chains to be clustered it does not allow for all unique protein complexes to be clustered. To overcome this problem we removed chain identifiers in the FASTA files. The popular BLAST(*I*) method was not used because the computing of “all versus all” similarities would likely not be able to identify unique complexes properly since the chain identifiers in the FASTA files were removed. Since CD-HIT uses a “short word filter” method it can cluster properly even with these FASTA file modifications.

3) **Perl script to construct individual PDB files for each interacting chain within the parent PDB file.** This script reads a PDB, identifies atoms from different chains that interaction with each other, then creates a new formatted PDB file with those two chains. This process is repeated until all interacting chains have a new PDB file. If the parent PDB file contains more than one structure (*ei.* NMR structure), only the first structure is considered.

**Perl script to identify protein partner chains between separate entities.** This script reads a PDB file, identifies chains that belong to separate entities within the PDB file, and creates a list of the PDB code and partnering chains that are part of the separate entities. This enables us to find those helix interfaces that are between separate protein entities as opposed to helical interfaces between chains in a single protein.

4) **Modifications within Rosetta written in C++ programming language to identify helical interfaces between interacting protein chains.** Rosetta contains programs that identify

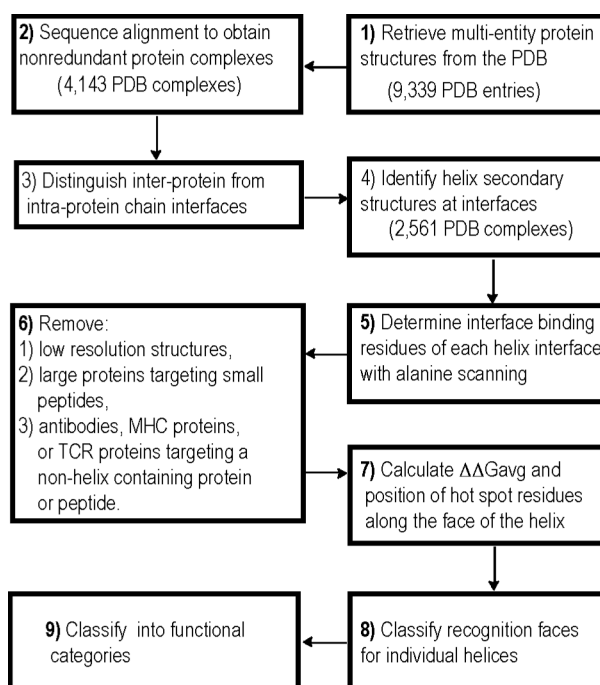

**Figure S1.** Protocol for the evaluation of structures from the Protein Data Bank to identify and assess helical interfaces in protein–protein (HIPP) interactions.

interface residues and assigns secondary structure to a protein backbone using  $\phi$  and  $\varphi$  dihedral angle analysis. We then link the interface and secondary structure assignment subroutines to find protein chains with interface residues that lie within a helix. We define helical segment as one that contains at least four contiguous residues with  $\phi$  and  $\varphi$  angles that are characteristic of the  $\alpha$ -helix ( $\phi = -47^\circ \pm 25^\circ$ ,  $\varphi = -57^\circ \pm 25^\circ$ ).

The Dictionary of Secondary Structure of Proteins (DSSP)(2) and STRIDE(3) are common methods for obtaining information on protein secondary structure of proteins in the PDB. DSSP relies on hydrogen-bonding patterns in proteins to determine secondary structure and STRIDE uses a knowledge-based structure assignment. Although these methods are reliable for determining secondary structure, similar results are also obtained with  $\phi$  and  $\varphi$  analysis as in Rosetta.(3) We performed random checks on secondary structures as calculated by Rosetta and defined by DSSP and STRIDE and found that the three methods are comparable. We used Rosetta for secondary structure analysis to retain consistency across our computer codes.

Often, protein-protein interfaces are defined according to geometrically continuous patches of residues on the surface of a protein that exclude solvent by binding to another chain.(4) This definition might include some residues that are not really involved in the interaction or exclude some residues that play a key role in the interaction.(5) Therefore, we use a distance threshold between residues of different chains. When parsing PDB files, it is difficult to determine when contacting chains reflect crystal packing or a genuine biological assembly. The problem is amplified when hundreds of PDB files are automatically parsed. Two approaches are suggested for remedying this problem. One calculates the reduction of solvent accessibility due to oligomerisation(6) and while the other is based on measuring the conservation of contacting residues.(7) Instead of relying on these prediction algorithms, we visually inspected each candidate target in categories 1-3 for crystal packing multimers and eliminated those few interactions that were artifacts of crystal packing.

5) Hot spot residues were predicted by a computational alanine scan on each of the complexes in the dataset using the Rosetta 2.0 software. There are additional methods, besides Rosetta alanine scanning, for predicting hot spot residues. These methods are either based on determining hot spot residues based on amino acid sequence or a scoring function.(8-11) Glycine and proline residues were exempted from mutation to alanine as any such event may result in a conformational change in the protein backbone. In cases of multiple side chain orientations for the same residue in a PDB file, we eliminated the residue from consideration as a hot spot residue.

6) The HIPPIE dataset of 2,561 complexes was further analyzed to screen for potential receptors with binding clefts and extended interfaces that may be targeted by small molecules and helix mimetics, respectively. Any such undertaking inevitably involves a number of subjective decisions.(12) Our procedure involved (1) removal of all entries with resolution  $>4.00 \text{ \AA}$  and all structures determined by methods other than X-ray crystallography or NMR spectroscopy. We note that hot spot analysis becomes increasingly unreliable with lower resolution structures. (2) Visually inspection of structures to eliminate complexes that we considered too large or complex to target with a small molecule or oligomer; examples include structures of nucleosomes, ribosomes, proteasomes, rubisco, and viral capsids. We also eliminated structures where

proteins containing a helix are complexed with a non-helical peptide such as T-cell receptor proteins, MHC proteins, and antibodies. Duplicate sequences and instances where a protein was identified to target a single helix or a protein with a helix targeting a non-helical peptide of length less than 12 residues were removed by automated procedures and verified by visual inspection.

7) HIPP interactions with a  $\Delta\Delta G_{\text{avg}} \geq 2$  kcal/mol were identified using a C++ program.

8) HIPPs with a  $\Delta\Delta G_{\text{avg}} \geq 2$  kcal/mol from step 7) were classified as

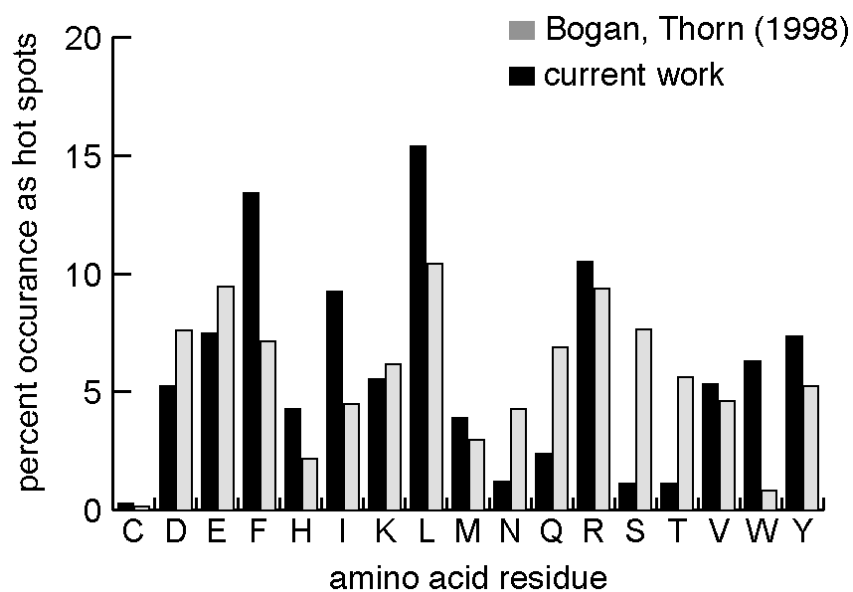

Figure S2. Comparison of amino acid preferences in hot spots from current study, and Bogan and Thorn (Bogan, A. A.; Thorn, K. S. *J. Mol. Biol.* **1998**, 280, 1.)

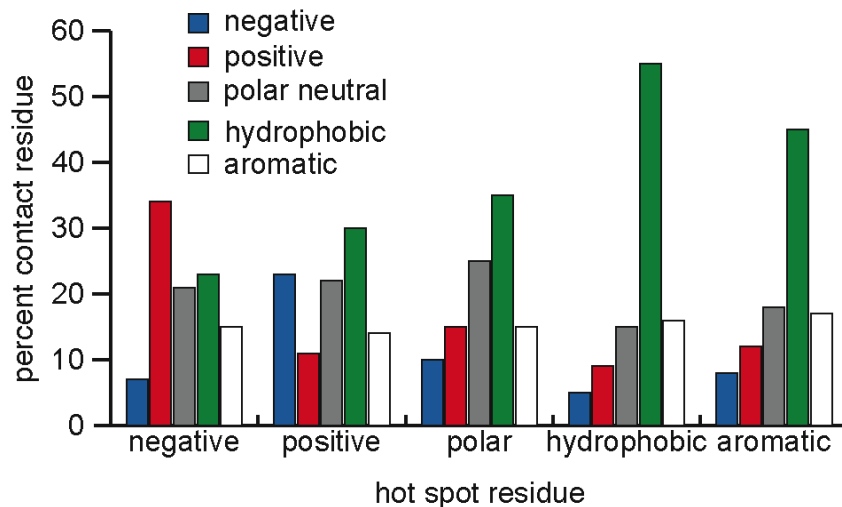

**Figure S3.** Classification of contact residues on partner proteins. Residues on the partner protein that are within 5 Å of the helical hotspot residue were analyzed within Rosetta.

## Supplementary References

1. Altschul, S., Gish, W., Miller, W., Myers, E., and Lipman, D. (1990) Basic local alignment search tool, *Journal of Molecular Biology* 215, 403-410.
2. Kabsch, W., and Sander, C. (1983) Dictionary of Protein Secondary Structure: Pattern Recognition of Hydrogen-Bonded and Geometrical Features, *Biopolymers* 22, 2577-2637.
3. Dmitriy, F., and Argos, P. (1995) Knowledge-Based Protein Secondary Structure Assignment, *Proteins: Structure, Function, and Genetics* 23, 566-579.
4. Jones, S., and Thornton, J. M. (1997) Analysis of protein-protein interaction sites using surface patches, *Journal of Molecular Biology* 272, 121-132.
5. Ofran, Y., and Rost, B. (2003) Analysing Six Types of Protein-Protein Interfaces, *Journal of Molecular Biology* 325, 377-387.
6. Henrick, K., and Thornton, J. M. (1998) PQS: a protein quaternary structure file server, *Trends in Biochemical Sciences* 23, 358-361.
7. Elcock, A. H., and McCammon, J. A. (2001) Identification of protein oligomerization states by analysis of interface conservation., *Proceedings of the National Academy of Sciences USA* 98, 2990-2994.
8. Guney, E., Tuncbag, N., Keskin, O., and Gursoy, A. (2008) HotSprint: database of computational hot spots in protein interfaces, *Nucleic Acids Research* 36, D662-D666.
9. Schymkowitz, J., Borg, J., Stricher, F., Nys, R., Rousseau, F., and Serrano, L. (2005) The FoldX web server: an online force field, *Nucleic Acids Research* 33, W382-W388.
10. Massova, I., and Kollman, P. A. (1999) Computational Alanine Scanning to Probe Protein-Protein Interactions: A Novel Approach to Evaluate Binding Free Energies, *J. Am. Chem. Soc.* 121, 8133-8143.
11. Ofran, Y., and Rost, B. (2007) Protein-Protein Interaction Hotspots Carved into Sequences, *PLoS Comput Biol* 3, e119.
12. Tsai, C.-J., Lin, S. L., Wolfson, H. J., and Nussinov, R. (1996) A Dataset of Protein-Protein Interfaces Generated with a Sequence-order-independent Comparison Technique, *Journal of Molecular Biology* 260, 604-620.

**Table S1.** Dataset of HIPP interactions with hotspots on one helical face

## Description of Entries:

- A. PDB code of predicted target.
- B. Chains in the complex featuring a helix at the interface.
- C. Candidate helix to be mimicked is part of the indicated chain.
- D. Title of PDB entry.
- E. Function of protein complex.
- F.  $\Delta\Delta G_{\text{avg}}/\text{helix}$  is derived from Rosetta computational alanine mutagenesis studies and indicates the average free energy penalty for mutating two or more key residues in the helix at the interface to alanine.
- G.  $\Delta\Delta G_{\text{sum}}/\text{helix}$  is derived from Rosetta computational alanine mutagenesis studies and indicates the average free energy penalty for mutating two or more key residues at the interface to alanine.
- H.  $\Delta\Delta G_{\text{sum}}/\text{chain}$  is derived from Rosetta computational alanine mutagenesis studies and indicates the sum free energy penalty for mutating two or more key residues in the helix at the interface to alanine.
- I. Helix contribution refers to the proportion of key contact residues positioned on the candidate helix as compared to the chain (see text for a detailed explanation).
- J. Number of hot spot residues in helix.
- K. Relative positioning of the hot spot residues on a helix.
- L. Hot spot residues derived from Rosetta computational alanine scanning mutagenesis.
- M. Number of residues separating end hot spot residues (see Methods for more details).
- N. Length of candidate helix to be mimicked.
- O. First residue of the candidate helix segment.
- P. Last residue of the candidate helix segment.
- Q. Sequence of candidate helix to be mimicked.
- R. Resolution of PDB structure (NOT APP indicates NMR structure).

| A. PDB CODE | B. INTERFACE CHAINS | C. CHAIN | D. TITLE                                                                             |
|-------------|---------------------|----------|--------------------------------------------------------------------------------------|
| 1A00        | A B                 | A        | CHEY-BINDING DOMAIN OF CHEA IN COMPLEX WITH CHEY                                     |
| 1A00        | C D                 | D        | CHEY-BINDING DOMAIN OF CHEA IN COMPLEX WITH CHEY                                     |
| 1A4Y        | D E                 | E        | RIBONUCLEASE INHIBITOR-ANGIOGENIN COMPLEX                                            |
| 1A9N        | A B                 | B        | CRYSTAL STRUCTURE OF THE SPLICEOSOMAL U2B''-U2A' PROTEIN COMPLEX BOUND TO A FRAGM    |
| 1AY7        | A B                 | B        | RIBONUCLEASE SA COMPLEX WITH BARSTAR                                                 |
| 1B0N        | A B                 | B        | SINR PROTEIN/SINI PROTEIN COMPLEX                                                    |
| 1B27        | B E                 | E        | STRUCTURAL RESPONSE TO MUTATION AT A PROTEIN-PROTEIN INTERFACE                       |
| 1B9X        | A B                 | B        | STRUCTURAL ANALYSIS OF PHOSDUCIN AND ITS PHOSPHORYLATION- REGULATED INTERACTIO       |
| 1BDJ        | A B                 | B        | COMPLEX STRUCTURE OF HPT DOMAIN AND CHEY                                             |
| 1BXL        | A B                 | B        | STRUCTURE OF BCL-XL/BAK PEPTIDE COMPLEX, NMR, MINIMIZED AVERAGE STRUCTURE            |
| 1D2Z        | C B                 | C        | THREE-DIMENSIONAL STRUCTURE OF A COMPLEX BETWEEN THE DEATH DOMAINS OF PELLE AN       |
| 1DE4        | G I                 | G        | HEMOCHROMATOSIS PROTEIN HFE COMPLEXED WITH TRANSFERRIN RECEPTOR                      |
| 1DML        | C D                 | D        | CRYSTAL STRUCTURE OF HERPES SIMPLEX UL42 BOUND TO THE C- TERMINUS OF HSV POL         |
| 1DOA        | A B                 | B        | STRUCTURE OF THE RHO FAMILY GTP-BINDING PROTEIN CDC42 IN COMPLEX WITH THE MULTIFI    |
| 1DS6        | A B                 | A        | CRYSTAL STRUCTURE OF A RAC-RHO GDI COMPLEX                                           |
| 1E44        | B A                 | B        | RIBONUCLEASE DOMAIN OF COLICIN E3 IN COMPLEX WITH ITS IMMUNITY PROTEIN               |
| 1EM8        | A B                 | B        | CRYSTAL STRUCTURE OF CHI AND PSI SUBUNIT HETERODIMER FROM DNA POL III                |
| 1ES7        | A D                 | D        | COMPLEX BETWEEN BMP-2 AND TWO BMP RECEPTOR IA ECTODOMAINS                            |
| 1ES7        | C B                 | B        | COMPLEX BETWEEN BMP-2 AND TWO BMP RECEPTOR IA ECTODOMAINS                            |
| 1EUV        | A B                 | A        | X-RAY STRUCTURE OF THE C-TERMINAL ULP1 PROTEASE DOMAIN IN COMPLEX WITH SMT3, THE     |
| 1EUV        | A B                 | A        | X-RAY STRUCTURE OF THE C-TERMINAL ULP1 PROTEASE DOMAIN IN COMPLEX WITH SMT3, THE     |
| 1F47        | B A                 | A        | THE BACTERIAL CELL-DIVISION PROTEIN ZIPA AND ITS INTERACTION WITH AN FTSZ FRAGMENT I |
| 1FM6        | U X                 | U        | THE 2.1 ANGSTROM RESOLUTION CRYSTAL STRUCTURE OF THE HETERODIMER OF THE HUMAN I      |
| 1FOE        | C D                 | C        | CRYSTAL STRUCTURE OF RAC1 IN COMPLEX WITH THE GUANINE NUCLEOTIDE EXCHANGE REGI       |
| 1FOE        | C D                 | C        | CRYSTAL STRUCTURE OF RAC1 IN COMPLEX WITH THE GUANINE NUCLEOTIDE EXCHANGE REGI       |
| 1FOE        | C D                 | C        | CRYSTAL STRUCTURE OF RAC1 IN COMPLEX WITH THE GUANINE NUCLEOTIDE EXCHANGE REGI       |
| 1FOE        | C D                 | D        | CRYSTAL STRUCTURE OF RAC1 IN COMPLEX WITH THE GUANINE NUCLEOTIDE EXCHANGE REGI       |
| 1H2M        | A S                 | S        | FACTOR INHIBITING HIF-1 ALPHA IN COMPLEX WITH HIF-1 ALPHA FRAGMENT PEPTIDE           |
| 1H3O        | A B                 | B        | CRYSTAL STRUCTURE OF THE HUMAN TAF4-TAF12 (TAFII135-TAFII20) COMPLEX                 |
| 1H59        | A B                 | B        | COMPLEX OF IGF1BP3 WITH IGF-1                                                        |
| 1H6K        | A X                 | X        | NUCLEAR CAP BINDING COMPLEX                                                          |
| 1HE1        | A C                 | A        | CRYSTAL STRUCTURE OF THE COMPLEX BETWEEN THE GAP DOMAIN OF THE PSEUDOMONAS AE        |
| 1HH4        | A D                 | A        | RAC1-RHO GDI COMPLEX INVOLVED IN NADPH OXIDASE ACTIVATION                            |
| 1HH4        | B E                 | B        | RAC1-RHO GDI COMPLEX INVOLVED IN NADPH OXIDASE ACTIVATION                            |
| 1HH4        | B E                 | E        | RAC1-RHO GDI COMPLEX INVOLVED IN NADPH OXIDASE ACTIVATION                            |
| 1HV2        | A B                 | B        | SOLUTION STRUCTURE OF YEAST ELONGIN C IN COMPLEX WITH A VON HIPPEL-LINDAU PEPTIDI    |
| 1HWM        | A B                 | A        | EBULIN, ORTHORHOMBIC CRYSTAL FORM MODEL                                              |
| 1I7W        | C D                 | D        | BETA-CATENIN/PHOSPHORYLATED E-CADHERIN COMPLEX                                       |
| 1IWQ        | A B                 | A        | CRYSTAL STRUCTURE OF MARCKS CALMODULIN BINDING DOMAIN PEPTIDE COMPLEXED WITH         |
| 1J1D        | B C                 | C        | CRYSTAL STRUCTURE OF THE 46KDA DOMAIN OF HUMAN CARDIAC TROPONIN IN THE CA2+ SAT      |
| 1J2J        | A B                 | A        | CRYSTAL STRUCTURE OF GGA1 GAT N-TERMINAL REGION IN COMPLEX WITH ARF1 GTP FORM        |
| 1JPW        | B E                 | E        | CRYSTAL STRUCTURE OF A HUMAN TCF-4 / BETA-CATENIN COMPLEX                            |
| 1KBH        | A B                 | A        | MUTUAL SYNERGISTIC FOLDING IN THE INTERACTION BETWEEN NUCLEAR RECEPTOR COACTIV       |
| 1KI1        | A B                 | A        | GUANINE NUCLEOTIDE EXCHANGE REGION OF INTERSECTIN IN COMPLEX WITH CDC42              |
| 1L2W        | A I                 | I        | CRYSTAL STRUCTURE OF THE YERSINIA VIRULENCE EFFECTOR YOPE CHAPERONE-BINDING DO       |
| 1L8C        | A B                 | B        | STRUCTURAL BASIS FOR HIF-1ALPHA/CBP RECOGNITION IN THE CELLULAR HYPOXIC RESPONSE     |
| 1LB1        | C D                 | D        | CRYSTAL STRUCTURE OF THE DBL AND PLECKSTRIN HOMOMOLOGY DOMAINS OF DBS IN COMPLE      |
| 1LB1        | E F                 | F        | CRYSTAL STRUCTURE OF THE DBL AND PLECKSTRIN HOMOMOLOGY DOMAINS OF DBS IN COMPLE      |
| 1LQB        | B C                 | B        | CRYSTAL STRUCTURE OF A HYDROXYLATED HIF-1 ALPHA PEPTIDE BOUND TO THE PVHL/ELONG      |
| 1LTX        | A R                 | A        | STRUCTURE OF RAB ESCORT PROTEIN-1 IN COMPLEX WITH RAB GERANYLGERANYL TRANSFER        |
| 1LTX        | A R                 | R        | STRUCTURE OF RAB ESCORT PROTEIN-1 IN COMPLEX WITH RAB GERANYLGERANYL TRANSFER        |
| 1MZN        | C D                 | D        | CRYSTAL STRUCTURE AT 1.9 ANGSTROMS RESOLUTION OF THE HOMODIMER OF HUMAN RXR A        |
| 1N1J        | A B                 | B        | CRYSTAL STRUCTURE OF THE NF-YB/NF-YC HISTONE PAIR                                    |
| 1NRL        | B D                 | D        | CRYSTAL STRUCTURE OF THE HUMAN PXR-LBD IN COMPLEX WITH AN SRC-1 COACTIVATOR PEP      |
| 1NU7        | E F                 | E        | STAPHYLOCOAGULASE-THROMBIN COMPLEX                                                   |
| 1OL5        | A B                 | B        | STRUCTURE OF AURORA-A 122-403, PHOSPHORYLATED ON THR287, THR288 AND BOUND TO TPX2    |



TABLE S1

Bullock, et. al

| A. PDB<br>CODE | E. FUNCTION                                | F. $\Delta\Delta G_{\text{AVG,HELIX}}$<br>(KCAL/MOL) | G. $\Delta\Delta G_{\text{SUM,HELIX}}$<br>(KCAL/MOL) | H. $\Delta\Delta G_{\text{SUM,CHAIN}}$<br>(KCAL/MOL) |
|----------------|--------------------------------------------|------------------------------------------------------|------------------------------------------------------|------------------------------------------------------|
| 1A0O           | CHEMOTAXIS                                 | 2.0                                                  | 4.1                                                  | 4.1                                                  |
| 1A0O           | CHEMOTAXIS                                 | 2.2                                                  | 4.4                                                  | 4.4                                                  |
| 1A4Y           | COMPLEX (INHIBITOR/NUCLEASE)               | 2.0                                                  | 3.9                                                  | 5.1                                                  |
| 1A9N           | RNA BINDING PROTEIN/RNA                    | 2.0                                                  | 3.9                                                  | 3.9                                                  |
| 1AY7           | COMPLEX (ENZYME/INHIBITOR)                 | 2.2                                                  | 4.4                                                  | 7.7                                                  |
| 1B0N           | TRANSCRIPTION REGULATOR                    | 2.0                                                  | 5.9                                                  | 27.4                                                 |
| 1B27           | HYDROLASE/HYDROLASE INHIBITOR              | 3.2                                                  | 6.3                                                  | 11.2                                                 |
| 1B9X           | SIGNALING PROTEIN                          | 2.4                                                  | 7.2                                                  | 18.4                                                 |
| 1BDJ           | COMPLEX (CHEMOTAXIS/TRANSFERASE)           | 2.1                                                  | 4.1                                                  | 8.0                                                  |
| 1BXL           | COMPLEX (APOPTOSIS/PEPTIDE)                | 2.4                                                  | 4.8                                                  | 7.1                                                  |
| 1D2Z           | APOPTOSIS                                  | 2.0                                                  | 4.0                                                  | 5.7                                                  |
| 1DE4           | METAL TRANSPORT INHIBITOR/RECEPTOR         | 2.0                                                  | 3.9                                                  | 14.5                                                 |
| 1DML           | DNA BINDING PROTEIN/TRANSFERASE            | 3.8                                                  | 7.6                                                  | 14.4                                                 |
| 1DOA           | CELL CYCLE                                 | 2.3                                                  | 4.5                                                  | 10.4                                                 |
| 1DS6           | SIGNALING PROTEIN                          | 2.5                                                  | 4.9                                                  | 13.4                                                 |
| 1E44           | RIBONUCLEASE                               | 4.0                                                  | 8.0                                                  | 11.4                                                 |
| 1EM8           | GENE REGULATION                            | 3.5                                                  | 7.0                                                  | 11.5                                                 |
| 1ES7           | CYTOKINE                                   | 2.5                                                  | 4.9                                                  | 4.9                                                  |
| 1ES7           | CYTOKINE                                   | 2.1                                                  | 4.2                                                  | 4.2                                                  |
| 1EUV           | HYDROLASE                                  | 3.5                                                  | 6.9                                                  | 23.4                                                 |
| 1EUV           | HYDROLASE                                  | 2.6                                                  | 5.1                                                  | 23.4                                                 |
| 1F47           | CELL CYCLE                                 | 2.3                                                  | 4.5                                                  | 7.4                                                  |
| 1FM6           | TRANSCRIPTION                              | 2.1                                                  | 4.2                                                  | 5.6                                                  |
| 1FOE           | SIGNALING PROTEIN, IMMUNE SYSTEM/SIGNALING | 3.5                                                  | 10.6                                                 | 24.2                                                 |
| 1FOE           | SIGNALING PROTEIN, IMMUNE SYSTEM/SIGNALING | 2.9                                                  | 8.6                                                  | 24.2                                                 |
| 1FOE           | SIGNALING PROTEIN, IMMUNE SYSTEM/SIGNALING | 4.0                                                  | 7.8                                                  | 24.2                                                 |
| 1FOE           | SIGNALING PROTEIN, IMMUNE SYSTEM/SIGNALING | 2.0                                                  | 4.0                                                  | 32.8                                                 |
| 1H2M           | TRANSCRIPTION ACTIVATOR/INHIBITOR          | 2.3                                                  | 4.5                                                  | 5.5                                                  |
| 1H3O           | TRANSCRIPTION/TBP-ASSOCIATED FACTORS       | 2.1                                                  | 4.1                                                  | 14.3                                                 |
| 1H59           | INSULIN                                    | 2.2                                                  | 4.4                                                  | 6.1                                                  |
| 1H6K           | NUCLEAR PROTEIN                            | 2.2                                                  | 4.3                                                  | 9.4                                                  |
| 1HE1           | SIGNALING PROTEIN                          | 2.4                                                  | 4.7                                                  | 9.5                                                  |
| 1HH4           | SIGNALING PROTEIN/INHIBITOR                | 2.6                                                  | 5.1                                                  | 9.1                                                  |
| 1HH4           | SIGNALING PROTEIN/INHIBITOR                | 2.2                                                  | 4.3                                                  | 13.6                                                 |
| 1HH4           | SIGNALING PROTEIN/INHIBITOR                | 2.2                                                  | 4.3                                                  | 7.1                                                  |
| 1HV2           | SIGNALING PROTEIN                          | 2.2                                                  | 4.3                                                  | 4.3                                                  |
| 1HWM           | HYDROLASE                                  | 2.1                                                  | 4.1                                                  | 9.2                                                  |
| 1I7W           | CELL ADHESION                              | 2.1                                                  | 4.1                                                  | 22.7                                                 |
| 1IWQ           | METAL BINDING PROTEIN/PROTEIN BINDING      | 2.5                                                  | 4.9                                                  | 22.1                                                 |
| 1J1D           | CONTRACTILE PROTEIN                        | 2.0                                                  | 4.0                                                  | 19.6                                                 |
| 1J2J           | PROTEIN TRANSPORT                          | 2.4                                                  | 4.7                                                  | 8.3                                                  |
| 1JPW           | CELL ADHESION                              | 2.1                                                  | 4.1                                                  | 14.0                                                 |
| 1KBH           | TRANSCRIPTION                              | 2.2                                                  | 4.3                                                  | 7.8                                                  |
| 1KI1           | SIGNALING PROTEIN                          | 2.7                                                  | 5.3                                                  | 7.3                                                  |
| 1L2W           | CHAPERONE                                  | 2.1                                                  | 4.1                                                  | 8.3                                                  |
| 1L8C           | GENE REGULATION                            | 2.3                                                  | 4.6                                                  | 16.8                                                 |
| 1LB1           | SIGNALING PROTEIN                          | 2.1                                                  | 4.1                                                  | 16.3                                                 |
| 1LB1           | SIGNALING PROTEIN                          | 2.0                                                  | 3.9                                                  | 10.6                                                 |
| 1LQB           | GENE REGULATION                            | 2.3                                                  | 4.5                                                  | 13.8                                                 |
| 1LTX           | TRANSFERASE/PROTEIN BINDING                | 2.4                                                  | 4.7                                                  | 6.6                                                  |
| 1LTX           | TRANSFERASE/PROTEIN BINDING                | 3.2                                                  | 6.3                                                  | 9.7                                                  |
| 1MZN           | TRANSCRIPTION                              | 2.1                                                  | 6.2                                                  | 7.8                                                  |
| 1N1J           | DNA BINDING PROTEIN                        | 2.6                                                  | 5.1                                                  | 43.7                                                 |
| 1NRL           | TRANSCRIPTION                              | 2.0                                                  | 6.0                                                  | 6.0                                                  |
| 1NU7           | HYDROLASE/PROTEIN BINDING                  | 2.2                                                  | 4.3                                                  | 5.3                                                  |
| 1OL5           | TRANSFERASE/CELL CYCLE                     | 3.0                                                  | 6.0                                                  | 18.6                                                 |

TABLE S1

Bullock, et. al

| A. PDB<br>CODE | I. HELIX<br>CONTRIBUTION | J. # HOTSPOT<br>RESIDUES | K. HOTSPOT RESIDUES, RESIDUE #<br>$\Delta\Delta G_{(KCAL/MOL)}$ |
|----------------|--------------------------|--------------------------|-----------------------------------------------------------------|
| 1A0O           | 100%                     | 2                        | K122, 2.0; E125, 2.0;                                           |
| 1A0O           | 100%                     | 2                        | V211, 1.1; F214, 3.3;                                           |
| 1A4Y           | 76%                      | 2                        | R5, 1.9; H8, 2.0;                                               |
| 1A9N           | 100%                     | 2                        | R28, 1.8; Y31, 2.1;                                             |
| 1AY7           | 57%                      | 2                        | D35, 1.5; D39, 2.9;                                             |
| 1B0N           | 22%                      | 3                        | I32, 1.1; Y35, 2.6; L36, 2.2;                                   |
| 1B27           | 56%                      | 2                        | D36, 1.5; D40, 4.8;                                             |
| 1B9X           | 39%                      | 3                        | F540, 3.8; Y543, 2.4; V544, 1.0;                                |
| 1BDJ           | 51%                      | 2                        | E750, 1.3; E754, 2.8;                                           |
| 1BXL           | 68%                      | 2                        | L578, 2.7; I581, 2.1;                                           |
| 1D2Z           | 70%                      | 2                        | N112, 1.6; R115, 2.4;                                           |
| 1DE4           | 27%                      | 2                        | E146, 1.6; H150, 2.3;                                           |
| 1DML           | 53%                      | 2                        | F1231, 5.2; L1234, 2.4;                                         |
| 1DOA           | 43%                      | 2                        | Y51, 2.8; L55, 1.7;                                             |
| 1DS6           | 37%                      | 2                        | R66, 1.6; L67, 3.3;                                             |
| 1E44           | 70%                      | 2                        | F2, 5.4; Y5, 2.6;                                               |
| 1EM8           | 61%                      | 2                        | R118, 1.6; W122, 5.4;                                           |
| 1ES7           | 100%                     | 2                        | F785, 3.3; K788, 1.6;                                           |
| 1ES7           | 100%                     | 2                        | F285, 2.6; K288, 1.6;                                           |
| 1EUV           | 29%                      | 2                        | D451, 4.6; E455, 2.3;                                           |
| 1EUV           | 22%                      | 2                        | F474, 3.3; T477, 1.8;                                           |
| 1F47           | 61%                      | 2                        | F11, 2.1; I8, 2.4;                                              |
| 1FM6           | 75%                      | 2                        | E394, 1.2; Y397, 3.0;                                           |
| 1FOE           | 44%                      | 3                        | K1195, 4.4; L1198, 5.0; L1199, 1.2;                             |
| 1FOE           | 36%                      | 3                        | I1187, 1.2; I1190, 3.6; Q1191, 3.8;                             |
| 1FOE           | 32%                      | 2                        | I1231, 3.7; N1232, 4.1;                                         |
| 1FOE           | 12%                      | 2                        | R66, 2.1; L67, 1.9;                                             |
| 1H2M           | 82%                      | 2                        | L818, 2.1; L819, 2.4;                                           |
| 1H3O           | 29%                      | 2                        | L66, 2.6; V70, 1.5;                                             |
| 1H59           | 72%                      | 2                        | L70, 3.1; L74, 1.3;                                             |
| 1H6K           | 46%                      | 2                        | Y100, 2.6; R99, 1.7;                                            |
| 1HE1           | 49%                      | 2                        | Q182, 2.0; Q183, 2.7;                                           |
| 1HH4           | 56%                      | 2                        | H103, 3.1; H104, 2.0;                                           |
| 1HH4           | 32%                      | 2                        | R66, 2.4; L67, 1.9;                                             |
| 1HH4           | 61%                      | 2                        | Y351, 2.5; L355, 1.8;                                           |
| 1HV2           | 100%                     | 2                        | L158, 3.2; R161, 1.1;                                           |
| 1HWM           | 45%                      | 2                        | E235, 2.8; I239, 1.3;                                           |
| 1I7W           | 18%                      | 2                        | K717, 1.1; L718, 3.0;                                           |
| 1IWQ           | 22%                      | 2                        | L105, 1.2; M109, 3.7;                                           |
| 1J1D           | 20%                      | 2                        | K72, 2.9; L76, 1.1;                                             |
| 1J2J           | 57%                      | 2                        | L77, 2.7; H80, 2.0;                                             |
| 1JPW           | 29%                      | 2                        | V44, 2.0; K45, 2.1;                                             |
| 1KBH           | 55%                      | 2                        | I34, 3.0; V38, 1.3;                                             |
| 1KI1           | 73%                      | 2                        | L67, 3.0; L70, 2.3;                                             |
| 1L2W           | 49%                      | 2                        | Y39, 1.9; L43, 2.2;                                             |
| 1L8C           | 27%                      | 2                        | L141, 2.4; L145, 2.2;                                           |
| 1LB1           | 25%                      | 2                        | L69, 1.9; L72, 2.2;                                             |
| 1LB1           | 37%                      | 2                        | H105, 2.0; F106, 1.9;                                           |
| 1LQB           | 33%                      | 2                        | L101, 1.4; L104, 3.1;                                           |
| 1LTX           | 71%                      | 2                        | Q216, 2.4; F220, 2.3;                                           |
| 1LTX           | 65%                      | 2                        | R275, 3.5; F279, 2.8;                                           |
| 1MZN           | 79%                      | 3                        | L1475, 2.2; L1478, 1.4; L1479, 2.6;                             |
| 1N1J           | 12%                      | 2                        | R47, 1.5; I51, 3.6;                                             |
| 1NRL           | 100%                     | 3                        | L690, 2.6; H691, 1.0; L694, 2.4;                                |
| 1NU7           | 81%                      | 2                        | E14, 2.6; L14, 1.7;                                             |
| 1OL5           | 32%                      | 2                        | W34, 2.8; F35, 3.2;                                             |

TABLE S1

| A. PDB CODE | L. HOTSPOT RESIDUE HELIX POSITIONS | M. HOTSPOT RESIDUE END TO END LENGTH | N. HELIX LENGTH | O. HELIX START RESIDUE # | P. HELIX END RESIDUE # |
|-------------|------------------------------------|--------------------------------------|-----------------|--------------------------|------------------------|
| 1A00        | i; i+3;                            | 4                                    | 14              | 113                      | 126                    |
| 1A00        | i; i+3;                            | 4                                    | 12              | 205                      | 216                    |
| 1A4Y        | i; i+3;                            | 4                                    | 9               | 5                        | 13                     |
| 1A9N        | i; i+3;                            | 4                                    | 12              | 23                       | 34                     |
| 1AY7        | i; i+4;                            | 5                                    | 9               | 34                       | 42                     |
| 1B0N        | i; i+3; i+4;                       | 5                                    | 11              | 29                       | 39                     |
| 1B27        | i; i+4;                            | 5                                    | 9               | 35                       | 43                     |
| 1B9X        | i; i+3; i+4;                       | 5                                    | 14              | 533                      | 546                    |
| 1BDJ        | i; i+4;                            | 5                                    | 15              | 744                      | 758                    |
| 1BXL        | i; i+3;                            | 4                                    | 9               | 576                      | 584                    |
| 1D2Z        | i; i+3;                            | 4                                    | 7               | 111                      | 117                    |
| 1DE4        | i; i+4;                            | 5                                    | 12              | 140                      | 151                    |
| 1DML        | i; i+3;                            | 4                                    | 16              | 1220                     | 1235                   |
| 1DOA        | i; i+4;                            | 3                                    | 12              | 46                       | 57                     |
| 1DS6        | i; i+1;                            | 5                                    | 5               | 65                       | 69                     |
| 1E44        | i; i+3;                            | 2                                    | 6               | 2                        | 7                      |
| 1EM8        | i; i+4;                            | 4                                    | 14              | 115                      | 128                    |
| 1ES7        | i; i+3;                            | 5                                    | 7               | 783                      | 789                    |
| 1ES7        | i; i+3;                            | 4                                    | 7               | 283                      | 289                    |
| 1EUV        | i; i+4;                            | 4                                    | 14              | 451                      | 464                    |
| 1EUV        | i; i+3;                            | 5                                    | 10              | 473                      | 482                    |
| 1F47        | i; i+3;                            | 4                                    | 9               | 8                        | 16                     |
| 1FM6        | i; i+3;                            | 4                                    | 23              | 386                      | 408                    |
| 1FOE        | i; i+3; i+4;                       | 4                                    | 12              | 1195                     | 1206                   |
| 1FOE        | i; i+3; i+4;                       | 5                                    | 8               | 1187                     | 1194                   |
| 1FOE        | i; i+1;                            | 5                                    | 8               | 1226                     | 1233                   |
| 1FOE        | i; i+1;                            | 2                                    | 5               | 65                       | 69                     |
| 1H2M        | i; i+1;                            | 2                                    | 7               | 816                      | 822                    |
| 1H3O        | i; i+4;                            | 4                                    | 12              | 60                       | 71                     |
| 1H59        | i; i+4;                            | 2                                    | 7               | 69                       | 75                     |
| 1H6K        | i; i+1;                            | 5                                    | 12              | 91                       | 102                    |
| 1HE1        | i; i+1;                            | 5                                    | 5               | 181                      | 185                    |
| 1HH4        | i; i+1;                            | 5                                    | 13              | 93                       | 105                    |
| 1HH4        | i; i+1;                            | 2                                    | 5               | 65                       | 69                     |
| 1HH4        | i; i+4;                            | 2                                    | 12              | 346                      | 357                    |
| 1HV2        | i; i+3;                            | 2                                    | 14              | 158                      | 171                    |
| 1HWM        | i; i+4;                            | 2                                    | 9               | 233                      | 241                    |
| 1I7W        | i; i+1;                            | 5                                    | 7               | 716                      | 722                    |
| 1IWQ        | i; i+4;                            | 4                                    | 11              | 102                      | 112                    |
| 1J1D        | i; i+4;                            | 5                                    | 18              | 63                       | 80                     |
| 1J2J        | i; i+3;                            | 2                                    | 7               | 75                       | 81                     |
| 1JPW        | i; i+1;                            | 5                                    | 6               | 42                       | 47                     |
| 1KBH        | i; i+4;                            | 5                                    | 8               | 34                       | 41                     |
| 1KI1        | i; i+3;                            | 4                                    | 7               | 67                       | 73                     |
| 1L2W        | i; i+4;                            | 2                                    | 8               | 38                       | 45                     |
| 1L8C        | i; i+4;                            | 5                                    | 11              | 139                      | 149                    |
| 1LB1        | i; i+3;                            | 4                                    | 7               | 69                       | 75                     |
| 1LB1        | i; i+1;                            | 5                                    | 19              | 89                       | 107                    |
| 1LQB        | i; i+3;                            | 5                                    | 11              | 100                      | 110                    |
| 1LTX        | i; i+4;                            | 4                                    | 18              | 205                      | 222                    |
| 1LTX        | i; i+4;                            | 2                                    | 7               | 275                      | 281                    |
| 1MZN        | i; i+3; i+4;                       | 4                                    | 9               | 1473                     | 1481                   |
| 1N1J        | i; i+4;                            | 4                                    | 9               | 45                       | 53                     |
| 1NRL        | i; i+1; i+4;                       | 5                                    | 9               | 688                      | 696                    |
| 1NU7        | i; i+1;                            | 5                                    | 8               | 14                       | 14                     |
| 1OL5        | i; i+1;                            | 4                                    | 9               | 33                       | 41                     |

| A. PDB<br>CODE | Q. HELIX SEQUENCE       | R. RESOLUTION |
|----------------|-------------------------|---------------|
| 1A00           | AATLEEKLNKIFEK          | 2.95          |
| 1A00           | EDDITAVLCFVI            | 2.95          |
| 1A4Y           | RYTHFLTQH               | 2.00          |
| 1A9N           | KEELKRSLYALF            | 2.38          |
| 1AY7           | LDALWDCLT               | 1.70          |
| 1B0N           | PEEIRKYLLLN             | 1.90          |
| 1B27           | LDALWDALT               | 2.10          |
| 1B9X           | VSKCCEEFRDYVEE          | 3.00          |
| 1BDJ           | WEDNVGEWIEEMKEE         | 2.68          |
| 1BXL           | RQLAIIIGDD              | NOT APP       |
| 1D2Z           | HNAMRLI                 | 2.00          |
| 1DE4           | AWPTKLEWERHK            | 2.80          |
| 1DML           | AEETRRMLHRAFDTLA        | 2.70          |
| 1DOA           | ESLRKYKEALLG            | 2.60          |
| 1DS6           | DRLRP                   | 2.35          |
| 1E44           | FKDYGH                  | 2.40          |
| 1EM8           | PTARAALWQQICTY          | 2.10          |
| 1ES7           | SDFQCKD                 | 2.90          |
| 1ES7           | SDFQCKD                 | 2.90          |
| 1EUV           | DTIIIEFFMKYIEKS         | 1.60          |
| 1EUV           | SFFYTNLSER              | 1.60          |
| 1F47           | IPAFLRKQA               | 1.95          |
| 1FM6           | PAEVEALREKVYASLEAYCKHKY | 2.10          |
| 1FOE           | KYPLLLRELFAL            | 2.80          |
| 1FOE           | IKPIQRVL                | 2.80          |
| 1FOE           | KVASHINE                | 2.80          |
| 1FOE           | DRLRP                   | 2.80          |
| 1H2M           | EELLRAL                 | 2.50          |
| 1H30           | KKKLQDLVREVD            | 2.30          |
| 1H59           | PLHALLH                 | 2.10          |
| 1H6K           | RADAENAMRYIN            | 2.00          |
| 1HE1           | LQQWG                   | 2.00          |
| 1HH4           | VRAKWYPEVRHHC           | 2.70          |
| 1HH4           | DRLRP                   | 2.70          |
| 1HH4           | ESLRKYKEALLG            | 2.70          |
| 1HV2           | LKERCLQVVRSLVK          | NOT APP       |
| 1HWM           | FEELYKITG               | 2.80          |
| 1I7W           | KKLADMY                 | 2.00          |
| 1IWQ           | AAELRHVMTNL             | 2.00          |
| 1J1D           | REAEERRGEKGRALSTRA      | 2.61          |
| 1J2J           | RPLWRHY                 | 1.60          |
| 1JPW           | ADVKSS                  | 2.50          |
| 1KBH           | IPELVNQG                | NOT APP       |
| 1KI1           | LRPLSYP                 | 2.30          |
| 1L2W           | QYANNLAG                | 2.00          |
| 1L8C           | EELLRALDQVN             | NOT APP       |
| 1LB1           | LRPLSYP                 | 2.81          |
| 1LB1           | PDSLENIPEKWTPEVKHFC     | 2.81          |
| 1LQB           | ALELLMAANFL             | 2.00          |
| 1LTX           | ENVLLKELELVQNAFFTD      | 2.70          |
| 1LTX           | RADVFNS                 | 2.70          |
| 1MZN           | KILHRLQD                | 1.90          |
| 1N1J           | LARIKKIMK               | 1.67          |
| 1NRL           | KILHRLQE                | 2.00          |
| 1NU7           | ERELLESY                | 2.20          |
| 1OL5           | SWFEEKANL               | 2.50          |

| A. PDB CODE | B. INTERFACE CHAINS | C. CHAIN | D. TITLE                                                                           |
|-------------|---------------------|----------|------------------------------------------------------------------------------------|
| 1OOK        | A B                 | A        | CRYSTAL STRUCTURE OF THE COMPLEX OF PLATELET RECEPTOR GPIB- ALPHA AND HUMAN ALF    |
| 1OR7        | A C                 | A        | CRYSTAL STRUCTURE OF ESCHERICHIA COLI SIGMAE WITH THE CYTOPLASMIC DOMAIN OF ITS .  |
| 1OR7        | A C                 | A        | CRYSTAL STRUCTURE OF ESCHERICHIA COLI SIGMAE WITH THE CYTOPLASMIC DOMAIN OF ITS .  |
| 1OSV        | B D                 | D        | STRUCTURAL BASIS FOR BILE ACID BINDING AND ACTIVATION OF THE NUCLEAR RECEPTOR FXI  |
| 1QLS        | A D                 | D        | S100C (S100A11),OR CALGIZZARIN, IN COMPLEX WITH ANNEXIN I N-TERMINUS               |
| 1R4A        | A E                 | E        | CRYSTAL STRUCTURE OF GTP-BOUND ADP-RIBOSYLATION FACTOR LIKE PROTEIN 1 (ARL1) AND   |
| 1R8Q        | A E                 | A        | FULL-LENGTH ARF1-GDP-MG IN COMPLEX WITH BREFELDIN A AND A SEC7 DOMAIN              |
| 1RP3        | A B                 | B        | COCRYSTAL STRUCTURE OF THE FLAGELLAR SIGMA/ANTI-SIGMA COMPLEX, SIGMA-28/FLGM       |
| 1T0F        | B D                 | D        | CRYSTAL STRUCTURE OF THE TNSA/TNSC(504-555) COMPLEX                                |
| 1TTW        | A B                 | B        | CRYSTAL STRUCTURE OF THE YERSINIA PESTIS TYPE III SECRETION CHAPERONE SYCH IN COMP |
| 1TUE        | A B                 | B        | THE X-RAY STRUCTURE OF THE PAPILLOMAVIRUS HELICASE IN COMPLEX WITH ITS MOLECULA    |
| 1TUE        | H J                 | H        | THE X-RAY STRUCTURE OF THE PAPILLOMAVIRUS HELICASE IN COMPLEX WITH ITS MOLECULA    |
| 1U0S        | Y A                 | Y        | CHEMOTAXIS KINASE CHEA P2 DOMAIN IN COMPLEX WITH RESPONSE REGULATOR CHEY FROM      |
| 1U7B        | A B                 | B        | CRYSTAL STRUCTURE OF HPCNA BOUND TO RESIDUES 331-350 OF THE FLAP ENDONUCLEASE-1 (I |
| 1U8T        | B F                 | F        | CRYSTAL STRUCTURE OF CHEY D13K Y106W ALONE AND IN COMPLEX WITH A FLIM PEPTIDE      |
| 1VCB        | B C                 | B        | THE VHL-ELONGINC-ELONGINB STRUCTURE                                                |
| 1X86        | G H                 | H        | CRYSTAL STRUCTURE OF THE DH/PH DOMAINS OF LEUKEMIA- ASSOCIATED RHOGEF IN COMPLE    |
| 1XCG        | A B                 | B        | CRYSTAL STRUCTURE OF HUMAN RHOA IN COMPLEX WITH DH/PH FRAGMENT OF PDZRHOGEF        |
| 1XL3        | A C                 | A        | COMPLEX STRUCTURE OF Y.PESTIS VIRULENCE FACTORS YOPN AND TYEA                      |
| 1XLS        | A E                 | A        | CRYSTAL STRUCTURE OF THE MOUSE CAR/RXR LBD HETERODIMER BOUND TO TCPOBOP AND 9C     |
| 1XV9        | C G                 | G        | CRYSTAL STRUCTURE OF CAR/RXR HETERODIMER BOUND WITH SRC1 PEPTIDE, FATTY ACID, AN   |
| 1Y3A        | A E                 | E        | STRUCTURE OF G-ALPHA-I1 BOUND TO A GDP-SELECTIVE PEPTIDE PROVIDES INSIGHT INTO GUA |
| 1YCR        | A B                 | B        | MDM2 BOUND TO THE TRANSACTIVATION DOMAIN OF P53                                    |
| 1YOK        | A B                 | B        | CRYSTAL STRUCTURE OF HUMAN LRH-1 BOUND WITH TIF-2 PEPTIDE AND PHOSPHATIDYLGLYCE    |
| 1Z2C        | A B                 | A        | CRYSTAL STRUCTURE OF MDIA1 GBD-FH3 IN COMPLEX WITH RHOC- GMPPNP                    |
| 1ZNV        | C D                 | C        | HOW A HIS-METAL FINGER ENDONUCLEASE COLE7 BINDS AND CLEAVES DNA WITH A TRANSITIC   |
| 1ZOQ        | A C                 | C        | IRF3-CBP COMPLEX                                                                   |
| 1ZOQ        | B D                 | D        | IRF3-CBP COMPLEX                                                                   |
| 1ZVV        | B P                 | P        | CRYSTAL STRUCTURE OF A CCPA-CRH-DNA COMPLEX                                        |
| 2A19        | A B                 | B        | PKR KINASE DOMAIN- EIF2ALPHA- AMP-PNP COMPLEX.                                     |
| 2A45        | A B                 | A        | CRYSTAL STRUCTURE OF THE COMPLEX BETWEEN THROMBIN AND THE CENTRAL "E" REGION O     |
| 2A4J        | A B                 | B        | SOLUTION STRUCTURE OF THE C-TERMINAL DOMAIN (T94-Y172) OF THE HUMAN CENTRIN 2 IN C |
| 2AGH        | B C                 | C        | STRUCTURAL BASIS FOR COOPERATIVE TRANSCRIPTION FACTOR BINDING TO THE CBP COACTIV   |
| 2B5L        | A C                 | C        | CRYSTAL STRUCTURE OF DDB1 IN COMPLEX WITH SIMIAN VIRUS 5 V PROTEIN                 |
| 2CCL        | C D                 | D        | THE S45A, T46A MUTANT OF THE TYPE I COHESIN-DOCKERIN COMPLEX FROM THE CELLULOSOM   |
| 2DWZ        | A B                 | B        | STRUCTURE OF THE ONCOPROTEIN GANKYRIN IN COMPLEX WITH S6 ATPASE OF THE 26S PROTE   |
| 2EKV        | A B                 | A        | THE CRYSTAL STRUCTURE OF RIGOR LIKE SQUID MYOSIN S1 IN THE ABSENCE OF NUCLEOTIDE   |
| 2EKV        | A B                 | A        | THE CRYSTAL STRUCTURE OF RIGOR LIKE SQUID MYOSIN S1 IN THE ABSENCE OF NUCLEOTIDE   |
| 2ERJ        | F H                 | H        | CRYSTAL STRUCTURE OF THE HETEROTRIMERIC INTERLEUKIN-2 RECEPTOR IN COMPLEX WITH     |
| 2F93        | A B                 | B        | K INTERMEDIATE STRUCTURE OF SENSORY RHODOPSIN II/TRANSDUCER COMPLEX IN COMBINA     |
| 2FM8        | B C                 | C        | CRYSTAL STRUCTURE OF THE SALMONELLA SECRETION CHAPERONE INVB IN COMPLEX WITH S     |
| 2FNJ        | A C                 | A        | CRYSTAL STRUCTURE OF A B30.2/SPRY DOMAIN-CONTAINING PROTEIN GUSTAVUS IN COMPLEX    |
| 2FO1        | D E                 | D        | CRYSTAL STRUCTURE OF THE CSL-NOTCH-MASTERMIND TERNARY COMPLEX BOUND TO DNA         |
| 2FO1        | B D                 | D        | SYNTHESIS, BIOLOGICAL ACTIVITY, AND X-RAY CRYSTAL STRUCTURAL ANALYSIS OF DIARYL E7 |
| 2G30        | A P                 | P        | BETA APPENDAGE OF AP2 COMPLEXED WITH ARH PEPTIDE                                   |
| 2G4D        | A B                 | A        | CRYSTAL STRUCTURE OF HUMAN SENP1 MUTANT (C603S) IN COMPLEX WITH SUMO-1             |
| 2GPV        | A G                 | G        | ESTROGEN RELATED RECEPTOR-GAMMA LIGAND BINDING DOMAIN COMPLEXED WITH 4-HYDR        |
| 2HRK        | A B                 | B        | STRUCTURAL BASIS OF YEAST AMINOACYL-TRNA SYNTHETASE COMPLEX FORMATION REVEAL       |
| 2HUE        | A B                 | B        | STRUCTURE OF THE H3-H4 CHAPERONE ASF1 BOUND TO HISTONES H3 AND H4                  |
| 2HUE        | B C                 | C        | STRUCTURE OF THE H3-H4 CHAPERONE ASF1 BOUND TO HISTONES H3 AND H4                  |
| 2HWN        | A E                 | E        | CRYSTAL STRUCTURE OF RII ALPHA DIMERIZATION/DOCKING DOMAIN OF PKA BOUND TO THE E   |
| 2I2R        | A E                 | E        | CRYSTAL STRUCTURE OF THE KCHIP1/KV4.3 T1 COMPLEX                                   |
| 2I2R        | B F                 | B        | CRYSTAL STRUCTURE OF THE KCHIP1/KV4.3 T1 COMPLEX                                   |
| 2IV8        | A P                 | P        | BETA APPENDAGE IN COMPLEX WITH B-ARRESTIN PEPTIDE                                  |
| 2J59        | A M                 | M        | CRYSTAL STRUCTURE OF THE ARF1:ARHGAP21-ARFBD COMPLEX                               |
| 2JTT        | A C                 | C        | SOLUTION STRUCTURE OF CALCIUM LOADED S100A6 BOUND TO C- TERMINAL SIAH-1 INTERACT   |

TABLE S1

Bullock, et. al

| A. PDB<br>CODE | E. FUNCTION                              | F. $\Delta\Delta G_{\text{AVG,HELIX}}$<br>(KCAL/MOL) | G. $\Delta\Delta G_{\text{SUM,HELIX}}$<br>(KCAL/MOL) | H. $\Delta\Delta G_{\text{SUM,CHAIN}}$<br>(KCAL/MOL) |
|----------------|------------------------------------------|------------------------------------------------------|------------------------------------------------------|------------------------------------------------------|
| 1OOK           | HYDROLASE                                | 2.1                                                  | 6.2                                                  | 15.3                                                 |
| 1OR7           | TRANSCRIPTION                            | 2.2                                                  | 4.4                                                  | 31.9                                                 |
| 1OR7           | TRANSCRIPTION                            | 2.0                                                  | 4.0                                                  | 31.9                                                 |
| 1OSV           | DNA BINDING PROTEIN                      | 2.3                                                  | 4.6                                                  | 4.6                                                  |
| 1QLS           | METAL-BINDING PROTEIN/INHIBITOR          | 7.8                                                  | 15.5                                                 | 15.5                                                 |
| 1R4A           | PROTEIN TRANSPORT                        | 2.1                                                  | 4.2                                                  | 10.5                                                 |
| 1R8Q           | PROTEIN TRANSPORT/EXCHANGE FACTOR        | 2.5                                                  | 4.9                                                  | 14.3                                                 |
| 1RP3           | TRANSCRIPTION                            | 2.2                                                  | 4.4                                                  | 31.0                                                 |
| 1T0F           | DNA BINDING PROTEIN                      | 2.2                                                  | 4.4                                                  | 18.9                                                 |
| 1TTW           | CHAPERONE                                | 2.2                                                  | 4.3                                                  | 11.4                                                 |
| 1TUE           | REPLICATION                              | 2.7                                                  | 8.1                                                  | 13.8                                                 |
| 1TUE           | REPLICATION                              | 2.5                                                  | 5.0                                                  | 16.6                                                 |
| 1U0S           | SIGNALING PROTEIN                        | 2.1                                                  | 4.1                                                  | 13.7                                                 |
| 1U7B           | REPLICATION                              | 3.0                                                  | 6.0                                                  | 6.0                                                  |
| 1U8T           | SIGNALING PROTEIN                        | 2.0                                                  | 5.9                                                  | 7.6                                                  |
| 1VCB           | TRANSCRIPTION                            | 2.1                                                  | 4.1                                                  | 10.1                                                 |
| 1X86           | SIGNALING PROTEIN/MEMBRANE PROTEIN       | 3.1                                                  | 6.1                                                  | 14.8                                                 |
| 1XCG           | SIGNALING PROTEIN ACTIVATOR/SIGNALING PR | 2.9                                                  | 5.8                                                  | 18.5                                                 |
| 1XL3           | CELL INVASION                            | 4.0                                                  | 12.0                                                 | 16.6                                                 |
| 1XLS           | TRANSCRIPTION                            | 3.3                                                  | 6.6                                                  | 9.5                                                  |
| 1XV9           | DNA BINDING PROTEIN                      | 2.7                                                  | 5.4                                                  | 6.4                                                  |
| 1Y3A           | SIGNALING PROTEIN                        | 3.1                                                  | 9.3                                                  | 9.3                                                  |
| 1YCR           | COMPLEX (ONCOGENE PROTEIN/PEPTIDE)       | 3.7                                                  | 11.1                                                 | 12.9                                                 |
| 1YOK           | TRANSCRIPTION                            | 2.8                                                  | 8.3                                                  | 8.3                                                  |
| 1Z2C           | SIGNALING PROTEIN                        | 2.6                                                  | 5.1                                                  | 15.1                                                 |
| 1ZNV           | HYDROLASE/PROTEIN BINDING                | 2.5                                                  | 4.9                                                  | 9.5                                                  |
| 1ZOQ           | TRANSCRIPTION/TRANSFERASE                | 2.1                                                  | 4.2                                                  | 7.6                                                  |
| 1ZOQ           | TRANSCRIPTION/TRANSFERASE                | 2.0                                                  | 4.0                                                  | 8.2                                                  |
| 1ZVV           | TRANSCRIPTION/DNA                        | 2.2                                                  | 4.4                                                  | 4.4                                                  |
| 2A19           | PROTEIN SYNTHESIS/TRANSFERASE            | 3.4                                                  | 6.7                                                  | 6.7                                                  |
| 2A45           | BLOOD CLOTTING                           | 2.1                                                  | 4.1                                                  | 4.1                                                  |
| 2A4J           | STRUCTURAL PROTEIN                       | 3.1                                                  | 6.2                                                  | 14.7                                                 |
| 2AGH           | TRANSCRIPTION                            | 2.3                                                  | 6.9                                                  | 8.2                                                  |
| 2B5L           | PROTEIN BINDING/VIRAL PROTEIN            | 2.4                                                  | 4.7                                                  | 8.4                                                  |
| 2CCL           | CELL ADHESION                            | 2.8                                                  | 5.6                                                  | 8.3                                                  |
| 2DWZ           | ONCOPROTEIN                              | 2.4                                                  | 7.2                                                  | 12.5                                                 |
| 2EKV           | CONTRACTILE PROTEIN                      | 2.9                                                  | 8.6                                                  | 16.3                                                 |
| 2EKV           | CONTRACTILE PROTEIN                      | 3.0                                                  | 5.9                                                  | 16.3                                                 |
| 2ERJ           | IMMUNE SYSTEM/CYTOKINE                   | 2.0                                                  | 3.9                                                  | 9.7                                                  |
| 2F93           | MEMBRANE PROTEIN                         | 2.2                                                  | 4.3                                                  | 7.2                                                  |
| 2FM8           | CHAPERONE/CELL INVASION                  | 2.2                                                  | 4.3                                                  | 4.3                                                  |
| 2FNJ           | PROTEIN TRANSPORT/SIGNALING PROTEIN      | 3.1                                                  | 6.1                                                  | 6.1                                                  |
| 2FO1           | GENE REGULATION/SIGNALING PROTEIN/DNA    | 2.2                                                  | 4.3                                                  | 5.3                                                  |
| 2FO1           | OXIDOREDUCTASE                           | 2.9                                                  | 5.7                                                  | 8.9                                                  |
| 2G30           | ENDOCYTOSIS/EXOCYTOSIS                   | 3.3                                                  | 6.6                                                  | 11.1                                                 |
| 2G4D           | HYDROLASE/PROTEIN BINDING                | 3.6                                                  | 10.8                                                 | 17.9                                                 |
| 2GPV           | TRANSCRIPTION                            | 2.1                                                  | 4.2                                                  | 4.2                                                  |
| 2HRK           | LIGASE/RNA BINDING PROTEIN               | 2.7                                                  | 5.3                                                  | 8.9                                                  |
| 2HUE           | DNA BINDING PROTEIN                      | 2.1                                                  | 4.2                                                  | 7.2                                                  |
| 2HUE           | DNA BINDING PROTEIN                      | 2.3                                                  | 4.5                                                  | 22.5                                                 |
| 2HWN           | TRANSFERASE                              | 2.1                                                  | 4.1                                                  | 4.1                                                  |
| 2I2R           | TRANSPORT PROTEIN                        | 2.0                                                  | 3.9                                                  | 8.3                                                  |
| 2I2R           | TRANSPORT PROTEIN                        | 3.4                                                  | 6.7                                                  | 19.2                                                 |
| 2IV8           | ENDOCYTOSIS/REGULATOR                    | 2.7                                                  | 5.4                                                  | 9.1                                                  |
| 2J59           | HYDROLASE                                | 2.1                                                  | 4.2                                                  | 4.2                                                  |
| 2JTT           | CALCIUM BINDING PROTEIN/ANTITUMOR PROTEI | 2.5                                                  | 5.0                                                  | 5.0                                                  |

TABLE S1

| A. PDB<br>CODE | I. HELIX<br>CONTRIBUTION | J. # HOTSPOT<br>RESIDUES | K. HOTSPOT RESIDUES, RESIDUE #<br>$\Delta\Delta G$ (KCAL/MOL) |
|----------------|--------------------------|--------------------------|---------------------------------------------------------------|
| 1OOK           | 41%                      | 3                        | E14, 1.9; E14, 2.3; L14, 2.0;                                 |
| 1OR7           | 14%                      | 2                        | R171, 1.3; F175, 3.1;                                         |
| 1OR7           | 13%                      | 2                        | F22, 1.3; L24, 2.7;                                           |
| 1OSV           | 100%                     | 2                        | L5, 3.3; R6, 1.3;                                             |
| 1QLS           | 100%                     | 2                        | F6, 1.0; L7, 14.5;                                            |
| 1R4A           | 40%                      | 2                        | E2174, 1.3; Y2177, 2.9;                                       |
| 1R8Q           | 34%                      | 2                        | L77, 3.0; Y81, 1.9;                                           |
| 1RP3           | 14%                      | 2                        | V60, 1.6; K64, 2.8;                                           |
| 1T0F           | 23%                      | 2                        | L521, 1.5; R522, 2.9;                                         |
| 1TTW           | 38%                      | 2                        | F45, 1.9; V49, 2.4;                                           |
| 1TUE           | 59%                      | 3                        | I20, 1.7; Y23, 4.9; E24, 1.5;                                 |
| 1TUE           | 30%                      | 2                        | F460, 2.8; I461, 2.2;                                         |
| 1U0S           | 30%                      | 2                        | I91, 2.2; I94, 1.9;                                           |
| 1U7B           | 100%                     | 2                        | L340, 2.8; F343, 3.2;                                         |
| 1U8T           | 78%                      | 3                        | I11, 2.0; D12, 1.5; Q8, 2.4;                                  |
| 1VCB           | 41%                      | 2                        | L101, 1.5; L104, 2.6;                                         |
| 1X86           | 41%                      | 2                        | D67, 3.5; L69, 2.6;                                           |
| 1XCG           | 31%                      | 2                        | L69, 3.7; L72, 2.1;                                           |
| 1XL3           | 72%                      | 3                        | F278, 4.7; W279, 4.4; F282, 2.9;                              |
| 1XLS           | 69%                      | 2                        | R426, 2.0; S427, 4.6;                                         |
| 1XV9           | 84%                      | 2                        | I632, 4.3; L633, 1.1;                                         |
| 1Y3A           | 100%                     | 3                        | W5, 4.2; F8, 3.3; L9, 1.8;                                    |
| 1YCR           | 86%                      | 3                        | F19, 2.5; L22, 2.5; W23, 6.1;                                 |
| 1YOK           | 100%                     | 3                        | L745, 2.9; L748, 2.7; L749, 2.7;                              |
| 1Z2C           | 34%                      | 2                        | R68, 4.0; L69, 1.1;                                           |
| 1ZNV           | 52%                      | 2                        | D52, 1.3; Y55, 3.6;                                           |
| 1ZOQ           | 55%                      | 2                        | Q2085, 2.2; I2089, 2.0;                                       |
| 1ZOQ           | 49%                      | 2                        | L2096, 1.6; F2100, 2.4;                                       |
| 1ZVV           | 100%                     | 2                        | I47, 2.4; M51, 2.0;                                           |
| 2A19           | 100%                     | 2                        | F489, 5.3; E490, 1.4;                                         |
| 2A45           | 100%                     | 2                        | E14, 1.6; L14, 2.5;                                           |
| 2A4J           | 42%                      | 2                        | 2, 4.2; 5, 2.0;                                               |
| 2AGH           | 84%                      | 3                        | I849, 2.0; F852, 3.8; V853, 1.1;                              |
| 2B5L           | 56%                      | 2                        | V24, 2.1; F27, 2.6;                                           |
| 2CCL           | 67%                      | 2                        | K18, 1.9; R19, 3.7;                                           |
| 2DWZ           | 58%                      | 3                        | R338, 2.1; R339, 1.4; R342, 3.7;                              |
| 2EKV           | 53%                      | 3                        | W828, 6.2; W829, 1.1; L831, 1.3;                              |
| 2EKV           | 36%                      | 2                        | K819, 2.5; L821, 3.4;                                         |
| 2ERJ           | 40%                      | 2                        | H16, 2.9; L19, 1.0;                                           |
| 2F93           | 60%                      | 2                        | I69, 2.1; I73, 2.2;                                           |
| 2FM8           | 100%                     | 2                        | F54, 3.0; I58, 1.3;                                           |
| 2FNJ           | 100%                     | 2                        | L241, 4.7; C245, 1.4;                                         |
| 2FO1           | 81%                      | 2                        | L69, 3.1; H70, 1.2;                                           |
| 2FOI           | 64%                      | 2                        | F368, 3.9; I369, 1.8;                                         |
| 2G30           | 59%                      | 2                        | L11, 1.5; F8, 5.1;                                            |
| 2G4D           | 60%                      | 3                        | D468, 3.2; E469, 1.2; N472, 6.4;                              |
| 2GPV           | 100%                     | 2                        | I1324, 2.0; L1328, 2.2;                                       |
| 2HRK           | 60%                      | 2                        | R102, 2.2; Y106, 3.1;                                         |
| 2HUE           | 58%                      | 2                        | L126, 2.5; I130, 1.7;                                         |
| 2HUE           | 20%                      | 2                        | R36, 1.8; L37, 2.7;                                           |
| 2HWN           | 100%                     | 2                        | V13, 2.8; M17, 1.3;                                           |
| 2I2R           | 47%                      | 2                        | I77, 1.5; Y78, 2.4;                                           |
| 2I2R           | 35%                      | 2                        | F11, 1.7; W8, 5.0;                                            |
| 2IV8           | 59%                      | 2                        | D3, 1.5; F6, 3.9;                                             |
| 2J59           | 100%                     | 2                        | I1053, 2.0; I1057, 2.2;                                       |
| 2JTT           | 100%                     | 2                        | I211, 1.8; W215, 3.2;                                         |

TABLE S1

| A. PDB CODE | L. HOTSPOT RESIDUE HELIX POSITIONS | M. HOTSPOT RESIDUE END TO END LENGTH | N. HELIX LENGTH | O. HELIX START RESIDUE # | P. HELIX END RESIDUE # |
|-------------|------------------------------------|--------------------------------------|-----------------|--------------------------|------------------------|
| 1OOK        | i; 1; 1;                           | 5                                    | 7               | 14                       | 14                     |
| 1OR7        | i; i+4;                            | 5                                    | 20              | 167                      | 186                    |
| 1OR7        | i; i+2;                            | 5                                    | 11              | 19                       | 29                     |
| 1OSV        | i; i+1;                            | 5                                    | 8               | 3                        | 10                     |
| 1QLS        | i; i+1;                            | 2                                    | 9               | 2                        | 10                     |
| 1R4A        | i; i+3;                            | 2                                    | 15              | 2173                     | 2187                   |
| 1R8Q        | i; i+4;                            | 4                                    | 8               | 75                       | 82                     |
| 1RP3        | i; i+4;                            | 5                                    | 14              | 56                       | 69                     |
| 1T0F        | i; i+1;                            | 3                                    | 7               | 521                      | 527                    |
| 1TTW        | i; i+4;                            | 2                                    | 7               | 44                       | 50                     |
| 1TUE        | i; i+3; i+4;                       | 2                                    | 23              | 4                        | 26                     |
| 1TUE        | i; i+1;                            | 4                                    | 14              | 460                      | 473                    |
| 1U0S        | i; i+3;                            | 5                                    | 10              | 87                       | 96                     |
| 1U7B        | i; i+3;                            | 5                                    | 5               | 340                      | 344                    |
| 1U8T        | i; i+3; i+4;                       | 2                                    | 7               | 8                        | 14                     |
| 1VCB        | i; i+3;                            | 5                                    | 15              | 97                       | 111                    |
| 1X86        | i; i+2;                            | 5                                    | 5               | 67                       | 71                     |
| 1XCG        | i; i+3;                            | 2                                    | 7               | 69                       | 75                     |
| 1XL3        | i; i+1; i+4;                       | 4                                    | 6               | 278                      | 283                    |
| 1XLS        | i; i+1;                            | 4                                    | 29              | 414                      | 442                    |
| 1XV9        | i; i+1;                            | 4                                    | 7               | 631                      | 637                    |
| 1Y3A        | i; i+3; i+4;                       | 4                                    | 6               | 5                        | 10                     |
| 1YCR        | i; i+3; i+4;                       | 5                                    | 6               | 19                       | 24                     |
| 1YOK        | i; i+3; i+4;                       | 4                                    | 9               | 743                      | 751                    |
| 1Z2C        | i; i+1;                            | 3                                    | 5               | 67                       | 71                     |
| 1ZNV        | i; i+3;                            | 4                                    | 6               | 51                       | 56                     |
| 1ZOQ        | i; i+4;                            | 5                                    | 13              | 2080                     | 2092                   |
| 1ZOQ        | i; i+4;                            | 5                                    | 12              | 2094                     | 2105                   |
| 1ZVV        | i; i+4;                            | 2                                    | 8               | 47                       | 54                     |
| 2A19        | i; i+1;                            | 2                                    | 12              | 488                      | 499                    |
| 2A45        | i; 1;                              | 5                                    | 8               | 14                       | 14                     |
| 2A4J        | i; i+3;                            | 5                                    | 8               | 2                        | 9                      |
| 2AGH        | i; i+3; i+4;                       | 5                                    | 12              | 847                      | 858                    |
| 2B5L        | i; i+3;                            | 2                                    | 11              | 23                       | 33                     |
| 2CCL        | i; i+1;                            | 3                                    | 12              | 11                       | 22                     |
| 2DWZ        | i; i+1; i+4;                       | 4                                    | 14              | 338                      | 351                    |
| 2EKV        | i; i+1; i+3;                       | 5                                    | 5               | 828                      | 832                    |
| 2EKV        | i; i+3;                            | 5                                    | 11              | 815                      | 825                    |
| 2ERJ        | i; i+3;                            | 5                                    | 26              | 4                        | 29                     |
| 2F93        | i; i+4;                            | 2                                    | 27              | 53                       | 79                     |
| 2FM8        | i; i+4;                            | 2                                    | 17              | 54                       | 70                     |
| 2FNJ        | i; i+4;                            | 4                                    | 10              | 241                      | 250                    |
| 2FO1        | i; i+1;                            | 5                                    | 17              | 68                       | 84                     |
| 2FO1        | i; i+1;                            | 4                                    | 12              | 368                      | 379                    |
| 2G30        | i; i+3;                            | 4                                    | 11              | 5                        | 15                     |
| 2G4D        | i; i+1; i+4;                       | 2                                    | 17              | 468                      | 484                    |
| 2GPV        | i; i+4;                            | 5                                    | 10              | 1321                     | 1330                   |
| 2HRK        | i; i+4;                            | 4                                    | 14              | 98                       | 111                    |
| 2HUE        | i; i+4;                            | 4                                    | 11              | 121                      | 131                    |
| 2HUE        | i; i+1;                            | 3                                    | 11              | 31                       | 41                     |
| 2HWN        | i; i+4;                            | 4                                    | 17              | 4                        | 20                     |
| 2I2R        | i; i+1;                            | 5                                    | 12              | 71                       | 82                     |
| 2I2R        | i; i+3;                            | 5                                    | 8               | 8                        | 15                     |
| 2IV8        | i; i+3;                            | 5                                    | 12              | 2                        | 13                     |
| 2J59        | i; i+4;                            | 2                                    | 22              | 1042                     | 1063                   |
| 2JTT        | i; i+4;                            | 2                                    | 14              | 205                      | 218                    |



TABLE S1

Bullock, et. al

| A. PDB<br>CODE | Q. HELIX SEQUENCE            | R. RESOLUTION |
|----------------|------------------------------|---------------|
| 1OOK           | ERELLES                      | 2.30          |
| 1OR7           | VGTVRSRIFRAREAIDNKVQ         | 2.00          |
| 1OR7           | QKAFNLLVVRY                  | 2.00          |
| 1OSV           | ALLRYLLD                     | 2.50          |
| 1QLS           | MVSAFLKQA                    | 2.30          |
| 1R4A           | TEFEYLRKVLFEYMM              | 2.30          |
| 1R8Q           | RPLWRHYF                     | 1.86          |
| 1RP3           | LEKKVKELKEKIEK               | 2.30          |
| 1T0F           | LRVIYSQ                      | 1.85          |
| 1TTW           | RFAYAVL                      | 2.38          |
| 1TUE           | PKETLSERLSALQDKIIDHYEND      | 2.10          |
| 1TUE           | FITFLGALKSFLKG               | 2.10          |
| 1U0S           | QAMVIEAIKA                   | 1.90          |
| 1U7B           | LDDFF                        | 1.88          |
| 1U8T           | QAEIDAL                      | 1.50          |
| 1VCB           | PEIALELLMAANFLD              | 2.70          |
| 1X86           | DRLRP                        | 3.22          |
| 1XCG           | LRPLSYP                      | 2.50          |
| 1XL3           | FWQFFS                       | 2.20          |
| 1XLS           | RFAKLLLRPALRSIGLKCLEHLFFFKLI | 2.96          |
| 1XV9           | KILHRLD                      | 2.70          |
| 1Y3A           | WYDFLM                       | 2.50          |
| 1YCR           | FSDLWK                       | 2.60          |
| 1YOK           | ALLRYLLDK                    | 2.50          |
| 1Z2C           | DRLRP                        | 3.00          |
| 1ZNV           | TDLIYY                       | 2.00          |
| 1ZOQ           | PQQQQQVLNILKS                | 2.37          |
| 1ZOQ           | PQLMAAFIKQRT                 | 2.37          |
| 1ZVV           | IMGLMSLA                     | 2.98          |
| 2A19           | AFETSKFFTDLR                 | 2.50          |
| 2A45           | ERELLESY                     | 3.65          |
| 2A4J           | WKLLAKGL                     | NOT APP       |
| 2AGH           | SDIMDFVLKNTF                 | NOT APP       |
| 2B5L           | TVEYFTSQQVT                  | 2.85          |
| 2CCL           | STDLTMLKRSVL                 | 2.03          |
| 2DWZ           | RRQKRLIFSTITSK               | 2.40          |
| 2EKV           | WWRLF                        | 3.40          |
| 2EKV           | RNVKRWLVLRN                  | 3.40          |
| 2ERJ           | SSSTKKTQLQLEHLLLDLQMILNGIN   | 3.00          |
| 2F93           | AAAVQEAAVSAILGLIILLGINLGLVA  | 2.00          |
| 2FM8           | FPALIKQASLDALFKCG            | 2.20          |
| 2FNJ           | LMDLCRRIR                    | 1.80          |
| 2FO1           | ELHRQRSELARANYEKA            | 3.12          |
| 2FO1           | FIDYAIIEYSEKY                | 2.50          |
| 2G30           | DEAFSRLAQSR                  | 1.60          |
| 2G4D           | DEIINFYMNMLMERSKE            | 2.80          |
| 2GPV           | EAIIRKALMG                   | 2.85          |
| 2HRK           | RHILRWIDYMQNLL               | 2.05          |
| 2HUE           | PKDIQLARRIR                  | 1.70          |
| 2HUE           | KPAIRRLARRG                  | 1.70          |
| 2HWN           | LAWKIAKMIVSDVMQQC            | 1.60          |
| 2I2R           | EDTFKQIYAQFF                 | 3.35          |
| 2I2R           | WLPFARAA                     | 3.35          |
| 2IV8           | DDIVFEDFARQR                 | 2.80          |
| 2J59           | EEDTGVNTNRDLISRIKEYNNL       | 2.10          |
| 2JTT           | DDMKRTINKAWVES               | NOT APP       |

| A. PDB CODE | B. INTERFACE CHAINS | C. CHAIN | D. TITLE                                                                           |
|-------------|---------------------|----------|------------------------------------------------------------------------------------|
| 2K8B        | A B                 | B        | SOLUTION STRUCTURE OF PLAA FAMILY UBIQUITIN BINDING DOMAIN (PFUC) CIS ISOMER IN CO |
| 2OCF        | A D                 | D        | HUMAN ESTROGEN RECEPTOR ALPHA LIGAND-BINDING DOMAIN IN COMPLEX WITH ESTRADIOL      |
| 2OF5        | C J                 | J        | OLIGOMERIC DEATH DOMAIN COMPLEX                                                    |
| 2OZN        | A B                 | B        | THE COHESIN-DOCKERIN COMPLEX OF NAGJ AND NAGH FROM CLOSTRIDIUM PERFRINGENS         |
| 2P5T        | E F                 | E        | MOLECULAR AND STRUCTURAL CHARACTERIZATION OF THE PEZAT CHROMOSOMAL TOXIN-AN        |
| 2PHE        | A C                 | C        | MODEL FOR VP16 BINDING TO PC4                                                      |
| 2PMS        | A C                 | C        | CRYSTAL STRUCTURE OF THE COMPLEX OF HUMAN LACTOFERRIN N- LOBE AND LACTOFERRIN-     |
| 2POP        | C D                 | C        | THE CRYSTAL STRUCTURE OF TAB1 AND BIR1 COMPLEX                                     |
| 2PQR        | B D                 | D        | CRYSTAL STRUCTURE OF YEAST FIS1 COMPLEXED WITH A FRAGMENT OF YEAST CAF4            |
| 2PV9        | A B                 | A        | CRYSTAL STRUCTURE OF MURINE THROMBIN IN COMPLEX WITH THE EXTRACELLULAR FRAGM       |
| 2QB0        | A D                 | D        | STRUCTURE OF THE 2TEL CRYSTALLIZATION MODULE FUSED TO T4 LYSOZYME WITH AN ALA-GI   |
| 2RHK        | A C                 | C        | CRYSTAL STRUCTURE OF INFLUENZA A NS1A PROTEIN IN COMPLEX WITH F2F3 FRAGMENT OF HI  |
| 2UZ6        | E O                 | O        | ACHBP-TARGETED A-CONOTOXIN CORRELATES DISTINCT BINDING ORIENTATIONS WITH NACHR     |
| 2V1S        | E L                 | L        | CRYSTAL STRUCTURE OF RAT TOM20-ALDH PRESEQUENCE COMPLEX                            |
| 2V52        | B M                 | M        | STRUCTURE OF MAL-RPEL2 COMPLEXED TO G-ACTIN                                        |
| 2VGO        | A D                 | D        | CRYSTAL STRUCTURE OF AURORA B KINASE IN COMPLEX WITH REVERSINE INHIBITOR           |
| 2VZD        | B D                 | D        | CRYSTAL STRUCTURE OF THE C-TERMINAL CALPONIN HOMOLOGY DOMAIN OF ALPHA PARVIN I     |
| 2W2X        | B C                 | B        | COMPLEX OF RAC2 AND PLCG2 SPPH DOMAIN                                              |
| 2W2X        | B C                 | C        | COMPLEX OF RAC2 AND PLCG2 SPPH DOMAIN                                              |
| 2W84        | A B                 | B        | STRUCTURE OF PEX14 IN COMPLEX WITH PEX5                                            |
| 2WAX        | A B                 | B        | STRUCTURE OF THE HUMAN DDX6 C-TERMINAL DOMAIN IN COMPLEX WITH AN EDC3-FDF PEPTI    |
| 2Z2S        | G H                 | H        | CRYSTAL STRUCTURE OF RHODOBACTER SPHAEROIDES SIGE IN COMPLEX WITH THE ANTI-SIGM    |
| 2ZNV        | A B                 | A        | CRYSTAL STRUCTURE OF HUMAN AMSH-LP DUB DOMAIN IN COMPLEX WITH LYS63-LINKED UBI     |
| 2ZSH        | A B                 | B        | STRUCTURAL BASIS OF GIBBERELLIN(GA3)-INDUCED DELLA RECOGNITION BY THE GIBBERELLI   |
| 3A1G        | A B                 | B        | HIGH-RESOLUTION CRYSTAL STRUCTURE OF RNA POLYMERASE PB1-PB2 SUBUNITS FROM INFLU    |
| 3BLH        | A B                 | B        | CRYSTAL STRUCTURE OF HUMAN CDK9/CYCLINT1                                           |
| 3BS5        | A B                 | A        | CRYSTAL STRUCTURE OF HCNK2-SAM/DHYP-SAM COMPLEX                                    |
| 3CJT        | A B                 | A        | RIBOSOMAL PROTEIN L11 METHYLTRANSFERASE (PRMA) IN COMPLEX WITH DIMETHYLATED RI     |
| 3CPH        | G A                 | G        | CRYSTAL STRUCTURE OF SEC4 IN COMPLEX WITH RAB-GDI                                  |
| 3CQX        | B C                 | C        | CHAPERONE COMPLEX                                                                  |
| 3D24        | A B                 | B        | CRYSTAL STRUCTURE OF LIGAND-BINDING DOMAIN OF ESTROGEN- RELATED RECEPTOR ALPHA     |
| 3D48        | P R                 | P        | CRYSTAL STRUCTURE OF A PROLACTIN RECEPTOR ANTAGONIST BOUND TO THE EXTRACELLUL      |
| 3DA7        | A D                 | D        | A CONFORMATIONALLY STRAINED, CIRCULAR PERMUTANT OF BARNASE                         |
| 3DAB        | E F                 | F        | STRUCTURE OF THE HUMAN MDMX PROTEIN BOUND TO THE P53 TUMOR SUPPRESSOR TRANSAC      |
| 3EBA        | A B                 | B        | CABHUL6 FGLW MUTANT (HUMANIZED) IN COMPLEX WITH HUMAN LYSOZYME                     |
| 3ECH        | A C                 | C        | THE MARR-FAMILY REPRESSOR MEXR IN COMPLEX WITH ITS ANTIREPRESSOR ARM               |
| 3EG5        | A B                 | A        | CRYSTAL STRUCTURE OF MDIA1-TSH GBD-FH3 IN COMPLEX WITH CDC42-GMPPNP                |
| 3F75        | A P                 | P        | ACTIVATED TOXOPLASMA GONDII CATHEPSIN L (TG CPL) IN COMPLEX WITH ITS PROPEPTIDE    |
| 3F9K        | B C                 | B        | TWO DOMAIN FRAGMENT OF HIV-2 INTEGRASE IN COMPLEX WITH LEDGF IBD                   |
| 3FMP        | A B                 | B        | CRYSTAL STRUCTURE OF THE NUCLEOPORIN NUP214 IN COMPLEX WITH THE DEAD-BOX HELICA    |
| 3FUB        | C D                 | C        | CRYSTAL STRUCTURE OF GDNF-GFRALPHA1 COMPLEX                                        |
| 3GCG        | A B                 | B        | CRYSTAL STRUCTURE OF MAP AND CDC42 COMPLEX                                         |
| 3H2U        | A B                 | A        | HUMAN RAVR1 RRM1, RRM2, AND RRM3 DOMAINS IN COMPLEX WITH HUMAN VINCULIN TAIL I     |
| 3H9R        | A B                 | A        | CRYSTAL STRUCTURE OF THE KINASE DOMAIN OF TYPE I ACTIVIN RECEPTOR (ACVR1) IN COMPI |
| 1A93        | A B                 | B        | NMR SOLUTION STRUCTURE OF THE C-MYC-MAX HETERODIMERIC LEUCINE ZIPPER, NMR, MINI    |
| 1AVO        | C D                 | D        | PROTEASOME ACTIVATOR REG(ALPHA)                                                    |
| 1BCC        | D H                 | H        | CYTOCHROME BC1 COMPLEX FROM CHICKEN                                                |
| 1BIQ        | A B                 | A        | RIBONUCLEOSIDE-DIPHOSPHATE REDUCTASE 1 BETA CHAIN MUTANT E238A                     |
| 1BIQ        | A B                 | B        | RIBONUCLEOSIDE-DIPHOSPHATE REDUCTASE 1 BETA CHAIN MUTANT E238A                     |
| 1BP3        | A B                 | A        | THE XRAY STRUCTURE OF A GROWTH HORMONE-PROLACTIN RECEPTOR COMPLEX                  |
| 1CKK        | A B                 | B        | CALMODULIN/RAT CA2+/CALMODULIN DEPENDENT PROTEIN KINASE FRAGMENT                   |
| 1CP9        | A B                 | A        | CRYSTAL STRUCTURE OF PENICILLIN G ACYLASE FROM THE BRO1 MUTANT STRAIN OF PROVIDE   |
| 1CUL        | A B                 | A        | COMPLEX OF GS-ALPHA WITH THE CATALYTIC DOMAINS OF MAMMALIAN ADENYLYL CYCLASE:      |
| 1DE4        | G I                 | G        | HEMOCHROMATOSIS PROTEIN HFE COMPLEXED WITH TRANSFERRIN RECEPTOR                    |
| 1DKF        | A B                 | A        | CRYSTAL STRUCTURE OF A HETERODIMERIC COMPLEX OF RAR AND RXR LIGAND-BINDING DOM     |
| 1DML        | A B                 | B        | CRYSTAL STRUCTURE OF HERPES SIMPLEX UL42 BOUND TO THE C- TERMINUS OF HSV POL       |

TABLE S1

Bullock, et. al

| A. PDB<br>CODE | E. FUNCTION                             | F. $\Delta\Delta G_{\text{AVG,HELIX}}$<br>(KCAL/MOL) | G. $\Delta\Delta G_{\text{SUM,HELIX}}$<br>(KCAL/MOL) | H. $\Delta\Delta G_{\text{SUM,CHAIN}}$<br>(KCAL/MOL) |
|----------------|-----------------------------------------|------------------------------------------------------|------------------------------------------------------|------------------------------------------------------|
| 2K8B           | PROTEIN BINDING                         | 2.1                                                  | 6.4                                                  | 6.4                                                  |
| 2OCF           | HORMONE/GROWTH FACTOR                   | 2.2                                                  | 4.4                                                  | 4.4                                                  |
| 2OF5           | APOPTOSIS                               | 3.5                                                  | 7.0                                                  | 7.0                                                  |
| 2OZN           | TOXIN                                   | 2.3                                                  | 4.5                                                  | 7.0                                                  |
| 2P5T           | TRANSCRIPTION REGULATOR                 | 2.1                                                  | 4.2                                                  | 17.9                                                 |
| 2PHE           | TRANSCRIPTION                           | 2.5                                                  | 7.6                                                  | 7.6                                                  |
| 2PMS           | METAL TRANSPORT, HYDROLASE              | 2.0                                                  | 4.0                                                  | 8.1                                                  |
| 2POP           | SIGNALING PROTEIN/APOPTOSIS             | 2.3                                                  | 7.0                                                  | 7.0                                                  |
| 2PQR           | APOPTOSIS                               | 2.9                                                  | 5.7                                                  | 22.6                                                 |
| 2PV9           | HYDROLASE                               | 2.2                                                  | 4.4                                                  | 8.5                                                  |
| 2QB0           | HYDROLASE REGULATOR                     | 2.1                                                  | 4.2                                                  | 10.6                                                 |
| 2RHK           | VIRAL PROTEIN/NUCLEAR PROTEIN           | 2.0                                                  | 4.0                                                  | 13.8                                                 |
| 2UZ6           | RECEPTOR                                | 4.2                                                  | 8.4                                                  | 10.6                                                 |
| 2V1S           | OXIDOREDUCTASE                          | 2.8                                                  | 5.5                                                  | 5.5                                                  |
| 2V52           | STRUCTURAL PROTEIN/CONTRACTILE PROTEIN  | 2.0                                                  | 6.0                                                  | 13.8                                                 |
| 2VGO           | TRANSFERASE                             | 2.0                                                  | 3.9                                                  | 20.1                                                 |
| 2VZD           | CELL ADHESION                           | 2.6                                                  | 5.1                                                  | 7.6                                                  |
| 2W2X           | SIGNALING PROTEIN/HYDROLASE             | 2.1                                                  | 4.1                                                  | 4.1                                                  |
| 2W2X           | SIGNALING PROTEIN/HYDROLASE             | 2.9                                                  | 5.8                                                  | 5.8                                                  |
| 2W84           | PROTEIN TRANSPORT                       | 4.1                                                  | 8.1                                                  | 8.1                                                  |
| 2WAX           | HYDROLASE                               | 2.0                                                  | 3.9                                                  | 18.7                                                 |
| 2Z2S           | TRANSCRIPTION                           | 2.0                                                  | 3.9                                                  | 9.5                                                  |
| 2ZNV           | HYDROLASE/SIGNALING PROTEIN             | 2.2                                                  | 4.4                                                  | 9.0                                                  |
| 2ZSH           | HORMONE RECEPTOR                        | 2.4                                                  | 4.8                                                  | 12.3                                                 |
| 3A1G           | TRANSFERASE                             | 2.1                                                  | 6.4                                                  | 9.1                                                  |
| 3BLH           | TRANSCRIPTION                           | 2.7                                                  | 5.3                                                  | 11.8                                                 |
| 3BS5           | SIGNALING PROTEIN/MEMBRANE PROTEIN      | 2.2                                                  | 4.4                                                  | 8.3                                                  |
| 3CJT           | TRANSFERASE/RIBOSOMAL PROTEIN           | 4.0                                                  | 8.0                                                  | 24.6                                                 |
| 3CPH           | PROTEIN TRANSPORT                       | 2.4                                                  | 4.8                                                  | 8.8                                                  |
| 3CQX           | CHAPERONE                               | 2.2                                                  | 4.4                                                  | 7.4                                                  |
| 3D24           | TRANSCRIPTION                           | 2.1                                                  | 6.4                                                  | 7.5                                                  |
| 3D48           | HORMONE/HORMONE RECEPTOR                | 2.4                                                  | 7.2                                                  | 16.3                                                 |
| 3DA7           | PROTEIN BINDING                         | 3.6                                                  | 7.1                                                  | 14.6                                                 |
| 3DAB           | CELL CYCLE                              | 3.5                                                  | 6.9                                                  | 8.2                                                  |
| 3EBA           | IMMUNE SYSTEM/HYDROLASE                 | 3.6                                                  | 7.2                                                  | 11.4                                                 |
| 3ECH           | TRANSCRIPTION, TRANSCRIPTION REGULATION | 5.7                                                  | 11.3                                                 | 12.4                                                 |
| 3EG5           | SIGNALING PROTEIN                       | 2.6                                                  | 7.8                                                  | 17.2                                                 |
| 3F75           | HYDROLASE                               | 2.6                                                  | 5.1                                                  | 19.6                                                 |
| 3F9K           | VIRAL PROTEIN, RECOMBINATION            | 2.0                                                  | 3.9                                                  | 5.4                                                  |
| 3FMP           | ONCOPROTEIN/HYDROLASE                   | 2.1                                                  | 6.2                                                  | 8.7                                                  |
| 3FUB           | HORMONE                                 | 2.1                                                  | 4.2                                                  | 5.3                                                  |
| 3GCG           | SIGNALING PROTEIN/TRANSCRIPTION         | 2.2                                                  | 4.4                                                  | 13.7                                                 |
| 3H2U           | CELL ADHESION                           | 2.6                                                  | 5.1                                                  | 7.2                                                  |
| 3H9R           | ISOMERASE/PROTEIN KINASE                | 2.0                                                  | 3.9                                                  | 6.6                                                  |
| 1A93           | LEUCINE ZIPPER                          | 2.0                                                  | 7.9                                                  | 7.9                                                  |
| 1AVO           | PROTEASOME ACTIVATOR                    | 2.0                                                  | 7.8                                                  | 18.5                                                 |
| 1BCC           | OXIDOREDUCTASE                          | 5.5                                                  | 11.0                                                 | 15.5                                                 |
| 1BIQ           | OXIDOREDUCTASE                          | 2.4                                                  | 7.2                                                  | 37.3                                                 |
| 1BIQ           | OXIDOREDUCTASE                          | 2.2                                                  | 6.7                                                  | 33.2                                                 |
| 1BP3           | HORMONE/GROWTH FACTOR                   | 2.0                                                  | 3.9                                                  | 14.4                                                 |
| 1CKK           | CALMODULIN-PEPTIDE COMPLEX              | 2.6                                                  | 5.1                                                  | 11.6                                                 |
| 1CP9           | HYDROLASE                               | 2.9                                                  | 11.5                                                 | 68.9                                                 |
| 1CUL           | LYASE/LYASE/SIGNALING PROTEIN           | 2.3                                                  | 4.5                                                  | 9.3                                                  |
| 1DE4           | METAL TRANSPORT INHIBITOR/RECEPTOR      | 2.7                                                  | 10.6                                                 | 14.5                                                 |
| 1DKF           | HORMONE/GROWTH FACTOR RECEPTOR          | 2.6                                                  | 5.2                                                  | 8.1                                                  |
| 1DML           | DNA BINDING PROTEIN/TRANSFERASE         | 3.1                                                  | 9.2                                                  | 12.1                                                 |

TABLE S1

Bullock, et. al

| A. PDB<br>CODE | I. HELIX<br>CONTRIBUTION | J. # HOTSPOT<br>RESIDUES | K. HOTSPOT RESIDUES, RESIDUE #<br>$\Delta\Delta G_{(KCAL/MOL)}$ |
|----------------|--------------------------|--------------------------|-----------------------------------------------------------------|
| 2K8B           | 100%                     | 3                        | M105, 1.4; F106, 2.3; Q109, 2.7;                                |
| 2OCF           | 100%                     | 2                        | L78, 2.3; L82, 2.1;                                             |
| 2OF5           | 100%                     | 2                        | D864, 5.2; E867, 1.8;                                           |
| 2OZN           | 64%                      | 2                        | I1588, 3.1; L1591, 1.4;                                         |
| 2P5T           | 23%                      | 2                        | H123, 2.1; Y127, 2.1;                                           |
| 2PHE           | 100%                     | 3                        | F475, 3.0; E476, 1.1; F479, 3.5;                                |
| 2PMS           | 49%                      | 2                        | E182, 2.8; N183, 1.2;                                           |
| 2POP           | 100%                     | 3                        | E2212, 2.4; D2213, 1.4; F2216, 3.2;                             |
| 2PQR           | 25%                      | 2                        | F101, 3.8; R102, 1.9;                                           |
| 2PV9           | 52%                      | 2                        | E14(E), 2.5; L14(F), 1.9;                                       |
| 2QB0           | 40%                      | 2                        | D79, 2.4; V80, 1.8;                                             |
| 2RHK           | 29%                      | 2                        | Y97, 1.7; F98, 2.3;                                             |
| 2UZ6           | 79%                      | 2                        | C8, 7.0; N11, 1.4;                                              |
| 2V1S           | 100%                     | 2                        | R17, 2.0; Y21, 3.5;                                             |
| 2V52           | 43%                      | 3                        | L118, 2.7; K119, 1.6; I122, 1.7;                                |
| 2VGO           | 19%                      | 2                        | L833, 1.4; L836, 2.5;                                           |
| 2VZD           | 67%                      | 2                        | L7, 3.1; L8, 2.0;                                               |
| 2W2X           | 100%                     | 2                        | L67, 2.5; L70, 1.6;                                             |
| 2W2X           | 100%                     | 2                        | F102, 3.5; V98, 2.3;                                            |
| 2W84           | 100%                     | 2                        | W103, 4.9; F107, 3.2;                                           |
| 2WAX           | 21%                      | 2                        | F206, 2.3; L210, 1.6;                                           |
| 2Z2S           | 41%                      | 2                        | S65, 1.0; L66, 2.9;                                             |
| 2ZNV           | 49%                      | 2                        | E329, 1.4; F332, 3.0;                                           |
| 2ZSH           | 39%                      | 2                        | L50, 2.1; E51, 2.7;                                             |
| 3A1G           | 70%                      | 3                        | R3, 2.8; I4, 2.2; L7, 1.4;                                      |
| 3BLH           | 45%                      | 2                        | F89, 2.2; K93, 3.1;                                             |
| 3BS5           | 53%                      | 2                        | R57, 2.4; R61, 2.0;                                             |
| 3CJT           | 33%                      | 2                        | W59, 4.5; W63, 3.5;                                             |
| 3CPH           | 55%                      | 2                        | R248, 3.5; I252, 1.3;                                           |
| 3CQX           | 59%                      | 2                        | Q156, 1.6; I160, 2.8;                                           |
| 3D24           | 85%                      | 3                        | L210, 2.6; Y213, 2.1; L214, 1.7;                                |
| 3D48           | 44%                      | 3                        | R177, 4.6; H180, 1.1; K181, 1.5;                                |
| 3DA7           | 49%                      | 2                        | D36, 1.3; D40, 5.8;                                             |
| 3DAB           | 84%                      | 2                        | F19, 3.3; W23, 3.6;                                             |
| 3EBA           | 63%                      | 2                        | D91, 2.0; C95, 5.2;                                             |
| 3ECH           | 91%                      | 2                        | W45, 7.0; Y48, 4.3;                                             |
| 3EG5           | 45%                      | 3                        | R66, 4.7; L67, 1.3; L70, 1.8;                                   |
| 3F75           | 26%                      | 2                        | R170, 2.6; F173, 2.5;                                           |
| 3F9K           | 72%                      | 2                        | M128, 1.3; W131, 2.6;                                           |
| 3FMP           | 71%                      | 3                        | D255, 1.7; Q256, 1.2; R259, 3.3;                                |
| 3FUB           | 79%                      | 2                        | R171, 2.5; I175, 1.7;                                           |
| 3GCG           | 32%                      | 2                        | I156, 1.3; F159, 3.1;                                           |
| 3H2U           | 71%                      | 2                        | L928, 1.2; E932, 3.9;                                           |
| 3H9R           | 59%                      | 2                        | W245, 2.1; F246, 1.8;                                           |
| 1A93           | 100%                     | 4                        | N10, 2.3; H13, 1.9; I17, 1.7; L20, 2.0;                         |
| 1AVO           | 42%                      | 4                        | H202, 1.4; Y209, 2.7; V216, 1.3; R220, 2.4;                     |
| 1BCC           | 71%                      | 2                        | F59, 3.8; F74, 7.2;                                             |
| 1BIQ           | 19%                      | 3                        | D158, 3.2; Y166, 1.4; L169, 2.6;                                |
| 1BIQ           | 20%                      | 3                        | L82, 1.3; I86, 1.0; R89, 4.4;                                   |
| 1BP3           | 27%                      | 2                        | H18, 1.0; F25, 2.9;                                             |
| 1CKK           | 44%                      | 2                        | W7, 3.5; K14, 1.6;                                              |
| 1CP9           | 17%                      | 4                        | L25, 2.4; F26, 2.3; Y29, 5.0; D36, 1.8;                         |
| 1CUL           | 48%                      | 2                        | V413, 1.9; D424, 2.6;                                           |
| 1DE4           | 73%                      | 4                        | H74, 1.9; T77, 2.8; V78, 4.2; W81, 1.7;                         |
| 1DKF           | 64%                      | 2                        | E395, 1.7; Y402, 3.5;                                           |
| 1DML           | 76%                      | 3                        | L1227, 1.2; F1231, 5.3; L1234, 2.7;                             |

TABLE S1

Bullock, et. al

| A. PDB CODE | L. HOTSPOT RESIDUE HELIX POSITIONS | M. HOTSPOT RESIDUE END TO END LENGTH | N. HELIX LENGTH | O. HELIX START RESIDUE # | P. HELIX END RESIDUE # |
|-------------|------------------------------------|--------------------------------------|-----------------|--------------------------|------------------------|
| 2K8B        | i; i+1; i+4;                       | 4                                    | 17              | 104                      | 120                    |
| 2OCF        | i; i+4;                            | 5                                    | 7               | 78                       | 84                     |
| 2OF5        | i; i+3;                            | 5                                    | 12              | 863                      | 874                    |
| 2OZN        | i; i+3;                            | 5                                    | 10              | 1588                     | 1597                   |
| 2P5T        | i; i+4;                            | 5                                    | 19              | 110                      | 128                    |
| 2PHE        | i; i+1; i+4;                       | 2                                    | 6               | 475                      | 480                    |
| 2PMS        | i; i+1;                            | 5                                    | 19              | 174                      | 192                    |
| 2POP        | i; i+1; i+4;                       | 2                                    | 11              | 2212                     | 2222                   |
| 2PQR        | i; i+1;                            | 4                                    | 9               | 97                       | 105                    |
| 2PV9        | i; i+1;                            | 3                                    | 6               | 14E                      | 14F                    |
| 2QB0        | i; i+1;                            | 4                                    | 14              | 78                       | 91                     |
| 2RHK        | i; i+1;                            | 5                                    | 6               | 97                       | 102                    |
| 2UZ6        | i; i+3;                            | 5                                    | 7               | 6                        | 12                     |
| 2V1S        | i; i+4;                            | 5                                    | 9               | 15                       | 23                     |
| 2V52        | i; i+1; i+4;                       | 5                                    | 9               | 116                      | 124                    |
| 2VGO        | i; i+3;                            | 5                                    | 5               | 833                      | 837                    |
| 2VZD        | i; i+1;                            | 4                                    | 10              | 2                        | 11                     |
| 2W2X        | i; i+3;                            | 4                                    | 9               | 65                       | 73                     |
| 2W2X        | i; i+4;                            | 5                                    | 16              | 98                       | 113                    |
| 2W84        | i; i+4;                            | 5                                    | 17              | 94                       | 110                    |
| 2WAX        | i; i+4;                            | 2                                    | 7               | 206                      | 212                    |
| 2Z2S        | i; i+1;                            | 5                                    | 5               | 65                       | 69                     |
| 2ZNV        | i; i+3;                            | 2                                    | 10              | 329                      | 338                    |
| 2ZSH        | i; i+1;                            | 4                                    | 16              | 43                       | 58                     |
| 3A1G        | i; i+1; i+4;                       | 2                                    | 8               | 3                        | 10                     |
| 3BLH        | i; i+4;                            | 2                                    | 16              | 80                       | 95                     |
| 3BS5        | i; i+4;                            | 2                                    | 7               | 56                       | 62                     |
| 3CJT        | i; i+4;                            | 4                                    | 8               | 59                       | 66                     |
| 3CPH        | i; i+4;                            | 5                                    | 15              | 239                      | 253                    |
| 3CQX        | i; i+4;                            | 3                                    | 10              | 153                      | 162                    |
| 3D24        | i; i+3; i+4;                       | 5                                    | 8               | 208                      | 215                    |
| 3D48        | i; i+3; i+4;                       | 4                                    | 34              | 161                      | 194                    |
| 3DA7        | i; i+4;                            | 2                                    | 9               | 35                       | 43                     |
| 3DAB        | i; i+4;                            | 5                                    | 8               | 19                       | 26                     |
| 3EBA        | i; i+4;                            | 5                                    | 11              | 90                       | 100                    |
| 3ECH        | i; i+3;                            | 2                                    | 7               | 44                       | 50                     |
| 3EG5        | i; i+1; i+4;                       | 4                                    | 9               | 65                       | 73                     |
| 3F75        | i; i+3;                            | 2                                    | 8               | 170                      | 177                    |
| 3F9K        | i; i+3;                            | 5                                    | 11              | 124                      | 134                    |
| 3FMP        | i; i+1; i+4;                       | 5                                    | 11              | 253                      | 263                    |
| 3FUB        | i; i+4;                            | 5                                    | 15              | 165                      | 179                    |
| 3GCG        | i; i+3;                            | 5                                    | 24              | 155                      | 178                    |
| 3H2U        | i; i+4;                            | 5                                    | 21              | 918                      | 938                    |
| 3H9R        | i; i+1;                            | 5                                    | 14              | 242                      | 255                    |
| 1A93        | i; i+3; i+7; i+10;                 | 11                                   | 29              | 6                        | 34                     |
| 1AVO        | i; i+7; i+14; i+18;                | 19                                   | 39              | 195                      | 233                    |
| 1BCC        | i; i+15;                           | 16                                   | 23              | 55                       | 77                     |
| 1BIQ        | i; i+8; i+11;                      | 16                                   | 19              | 153                      | 171                    |
| 1BIQ        | i; i+4; i+7;                       | 13                                   | 32              | 67                       | 98                     |
| 1BP3        | i; i+7;                            | 12                                   | 30              | 6                        | 35                     |
| 1CKK        | i; i+7;                            | 8                                    | 11              | 7                        | 17                     |
| 1CP9        | i; i+1; i+4; i+11;                 | 8                                    | 16              | 22                       | 37                     |
| 1CUL        | i; i+11;                           | 12                                   | 22              | 409                      | 430                    |
| 1DE4        | i; i+3; i+4; i+7;                  | 16                                   | 28              | 59                       | 86                     |
| 1DKF        | i; i+7;                            | 8                                    | 23              | 391                      | 413                    |
| 1DML        | i; i+4; i+7;                       | 12                                   | 16              | 1220                     | 1235                   |

| A. PDB<br>CODE | Q. HELIX SEQUENCE                       | R. RESOLUTION |
|----------------|-----------------------------------------|---------------|
| 2K8B           | PMFLDQVAKFIIDNTKG                       | NOT APP       |
| 2OCF           | LRLMLAG                                 | 2.95          |
| 2OF5           | QDVAAEEVRVAVLE                          | 3.20          |
| 2OZN           | IGDLAMVSKN                              | 1.60          |
| 2P5T           | PWILMSDDLSDLIHTNIYL                     | 3.20          |
| 2PHE           | FEQMFT                                  | NOT APP       |
| 2PMS           | PQAKIAELENQVHRLEQEL                     | 2.91          |
| 2POP           | EDELFRLSQLG                             | 3.10          |
| 2PQR           | SATTFRILA                               | 1.88          |
| 2PV9           | EKELLD                                  | 3.50          |
| 2QB0           | GDVLYELLQHILKQ                          | 2.56          |
| 2RHK           | YFYSKF                                  | 1.95          |
| 2UZ6           | PPCILNN                                 | 2.40          |
| 2V1S           | LSRLSYAG                                | 2.05          |
| 2V52           | DYLKRRKIRS                              | 1.45          |
| 2VGO           | LEELF                                   | 1.70          |
| 2VZD           | DDLALLADL                               | 2.10          |
| 2W2X           | DRLRPLSYP                               | 2.30          |
| 2W2X           | VEELFEWFQSIREITW                        | 2.30          |
| 2W84           | VADLALSENWAQEFLAA                       | NOT APP       |
| 2WAX           | FEGNLAL                                 | 2.30          |
| 2Z2S           | SLASV                                   | 2.70          |
| 2ZNV           | EELFNVQDQH                              | 1.60          |
| 2ZSH           | MADVAQKLEQLEVMMS                        | 1.80          |
| 3A1G           | RIKELRNL                                | 1.70          |
| 3BLH           | GNSVAPAALFLAAKVE                        | 2.48          |
| 3BS5           | GRALLRI                                 | 2.00          |
| 3CJT           | WLEAWRRD                                | 2.30          |
| 3CPH           | LGELPQGFARLSAIY                         | 2.90          |
| 3CQX           | QKFQSIVIGC                              | 2.30          |
| 3D24           | SELLKYLT                                | 2.11          |
| 3D48           | EESRLSAYYNLLHCLRRDSHKIDNYLKLLKCRII      | 2.50          |
| 3DA7           | LDALWDCLT                               | 2.25          |
| 3DAB           | FSDLWKLL                                | 1.90          |
| 3EBA           | ADAVACAKRVV                             | 1.85          |
| 3ECH           | AWDLYGE                                 | 1.80          |
| 3EG5           | DRLRPLSYP                               | 2.70          |
| 3F75           | RDEFRRKY                                | 1.99          |
| 3F9K           | QEVKMVAWWIG                             | 3.20          |
| 3FMP           | HQDQSIRIQRM                             | 3.19          |
| 3FUB           | DTCKKYRSAYITPCT                         | 2.35          |
| 3GCG           | PITRFNTQTKMIEQVSQEIFERNF                | 2.30          |
| 3H2U           | DIIAAAKRMALLMAEMSRLVR                   | 2.75          |
| 3H9R           | EKSWFRETelyNTV                          | 2.35          |
| 1A93           | MRRKNDTHQQDIDDLKRQNALLEQQVRAL           | NOT APP       |
| 1AVO           | GDYRQLVHELDEAEYRDIRLMVMEIRNAYAVLYDIILKN | 2.80          |
| 1BCC           | TEELFDLHARDHCVAHKLFNSL                  | 3.16          |
| 1BIQ           | ISSYYDELIEMTSYWHLLG                     | 2.05          |
| 1BIQ           | EHEKHIFISNLKYQTLLDSIQGRSPNVALLPL        | 2.05          |
| 1BP3           | LSRLFDNAMLRAHRLHQLAFDITYQEFEEAY         | 2.90          |
| 1CKK           | WTTVILVKSML                             | NOT APP       |
| 1CP9           | TYSLFYGYGYAVAQDR                        | 2.50          |
| 1CUL           | AQELVMTLNELFARFDKLAEN                   | 2.40          |
| 1DE4           | SQMWLQLSQSLKGDHMFVDFWTFIMEN             | 2.80          |
| 1DKF           | PAEVEALREKVYASLEAYCKHKY                 | 2.50          |
| 1DML           | AEETRRMLHRAFDTLA                        | 2.70          |

| A. PDB CODE | B. INTERFACE CHAINS | C. CHAIN | D. TITLE                                                                            |
|-------------|---------------------|----------|-------------------------------------------------------------------------------------|
| 1E7P        | E F                 | E        | QUINOL:FUMARATE REDUCTASE FROM WOLINELLA SUCCINOGENES                               |
| 1EFU        | C D                 | D        | ELONGATION FACTOR COMPLEX EF-TU/EF-TS FROM ESCHERICHIA COLI                         |
| 1F80        | A E                 | A        | HOLO-(ACYL CARRIER PROTEIN) SYNTHASE IN COMPLEX WITH HOLO- (ACYL CARRIER PROTEIN    |
| 1FM6        | A D                 | A        | THE 2.1 ANGSTROM RESOLUTION CRYSTAL STRUCTURE OF THE HETERODIMER OF THE HUMAN I     |
| 1G73        | A C                 | A        | CRYSTAL STRUCTURE OF SMAC BOUND TO XIAP-BIR3 DOMAIN                                 |
| 1GX7        | A D                 | A        | BEST MODEL OF THE ELECTRON TRANSFER COMPLEX BETWEEN CYTOCHROME C3 AND [FE]-HY       |
| 1H4L        | B E                 | E        | STRUCTURE AND REGULATION OF THE CDK5-P25(NCK5A) COMPLEX                             |
| 1HX1        | A B                 | B        | CRYSTAL STRUCTURE OF A BAG DOMAIN IN COMPLEX WITH THE HSC70 ATPASE DOMAIN           |
| 1I1R        | A B                 | B        | CRYSTAL STRUCTURE OF A CYTOKINE/RECEPTOR COMPLEX                                    |
| 1I2M        | C D                 | C        | RAN-RCC1-SO4 COMPLEX                                                                |
| 1I5K        | A C                 | C        | STRUCTURE AND BINDING DETERMINANTS OF THE RECOMBINANT KRINGLE-2 DOMAIN OF HUM       |
| 1IBR        | A B                 | B        | COMPLEX OF RAN WITH IMPORTIN BETA                                                   |
| 1J7D        | A B                 | A        | CRYSTAL STRUCTURE OF HMMS2-HUBC13                                                   |
| 1JEK        | A B                 | B        | VISNA TM CORE STRUCTURE                                                             |
| 1JYO        | A F                 | A        | STRUCTURE OF THE SALMONELLA VIRULENCE EFFECTOR SPTP IN COMPLEX WITH ITS SECRETIC    |
| 1LDK        | A D                 | A        | STRUCTURE OF THE CUL1-RBX1-SKP1-F BOXSKP2 SCF UBIQUITIN LIGASE COMPLEX              |
| 1LQB        | A B                 | B        | CRYSTAL STRUCTURE OF A HYDROXYLATED HIF-1 ALPHA PEPTIDE BOUND TO THE PVHL/ELONG     |
| 1M1E        | A B                 | A        | BETA-CATENIN ARMADILLO REPEAT DOMAIN BOUND TO ICAT                                  |
| 1N1J        | A B                 | A        | CRYSTAL STRUCTURE OF THE NF-YB/NF-YC HISTONE PAIR                                   |
| 1N1J        | A B                 | A        | CRYSTAL STRUCTURE OF THE NF-YB/NF-YC HISTONE PAIR                                   |
| 1NGM        | E F                 | F        | CRYSTAL STRUCTURE OF A YEAST BRF1-TBP-DNA TERNARY COMPLEX                           |
| 1NH2        | B D                 | B        | CRYSTAL STRUCTURE OF A YEAST TFIIA/TBP/DNA COMPLEX                                  |
| 1NH2        | B D                 | B        | CRYSTAL STRUCTURE OF A YEAST TFIIA/TBP/DNA COMPLEX                                  |
| 1NH2        | B D                 | D        | CRYSTAL STRUCTURE OF A YEAST TFIIA/TBP/DNA COMPLEX                                  |
| 1NU7        | B D                 | D        | STAPHYLOCOAGULASE-THROMBIN COMPLEX                                                  |
| 1NU9        | D F                 | F        | STAPHYLOCOAGULASE-PRETHROMBIN-2 COMPLEX                                             |
| 1NVM        | G H                 | G        | CRYSTAL STRUCTURE OF A BIFUNCTIONAL ALDOLASE-DEHYDROGENASE : SEQUESTERING A RE      |
| 1OR0        | A B                 | A        | CRYSTAL STRUCTURES OF GLUTARYL 7-AMINOCEPHALOSPORANIC ACID ACYLASE: INSIGHT INI     |
| 1OR7        | A C                 | C        | CRYSTAL STRUCTURE OF ESCHERICHIA COLI SIGMAE WITH THE CYTOPLASMIC DOMAIN OF ITS .   |
| 1OXK        | A B                 | B        | COMPLEX BETWEEN YPD1 AND SLN1 RESPONSE REGULATOR DOMAIN IN SPACE GROUP P3(2)        |
| 1R4M        | A B                 | A        | APPBP1-UBA3-NEDD8, AN E1-UBIQUITIN-LIKE PROTEIN COMPLEX                             |
| 1TI2        | A B                 | B        | CRYSTAL STRUCTURE OF PYROGALLOL-PHLOROGLUCINOL TRANSHYDROXYLASE FROM PELOB          |
| 1TQY        | A B                 | B        | THE ACTINORHODIN KETOSYNTHASE/CHAIN LENGTH FACTOR                                   |
| 1TY4        | A C                 | C        | CRYSTAL STRUCTURE OF A CED-9/EGL-1 COMPLEX                                          |
| 1UKV        | G Y                 | G        | STRUCTURE OF RABGDP-DISSOCIATION INHIBITOR IN COMPLEX WITH PRENYLATED YPT1 GTPAS    |
| 1VF6        | A C                 | C        | 2.1 ANGSTROM CRYSTAL STRUCTURE OF THE PALS-1-L27N AND PATJ L27 HETERODIMER COMPLE   |
| 1VG9        | G H                 | G        | THE CRYSTAL STRUCTURES OF THE REP-1 PROTEIN IN COMPLEX WITH C-TERMINALLY TRUNCAI    |
| 1WA8        | A B                 | A        | SOLUTION STRUCTURE OF THE CFP-10.ESAT-6 COMPLEX. MAJOR VIRULENCE DETERMINANTS OF    |
| 1WPX        | A B                 | A        | CRYSTAL STRUCTURE OF CARBOXYPEPTIDASE Y INHIBITOR COMPLEXED WITH THE COGNATE P      |
| 1WPX        | A B                 | B        | CRYSTAL STRUCTURE OF CARBOXYPEPTIDASE Y INHIBITOR COMPLEXED WITH THE COGNATE P      |
| 1XB2        | A B                 | A        | CRYSTAL STRUCTURE OF BOS TAURUS MITOCHONDRIAL ELONGATION FACTOR TU/TS COMPLEX       |
| 1XKP        | B C                 | C        | CRYSTAL STRUCTURE OF THE VIRULENCE FACTOR YOPN IN COMPLEX WITH ITS HETERODIMERI     |
| 1Y76        | C B                 | C        | SOLUTION STRUCTURE OF PATJ/PALS1 L27 DOMAIN COMPLEX                                 |
| 1YDI        | A B                 | B        | HUMAN VINCULIN HEAD DOMAIN (VH1, 1-258) IN COMPLEX WITH HUMAN ALPHA-ACTININ'S VIN   |
| 1YKE        | C D                 | D        | STRUCTURE OF THE MEDIATOR MED7/MED21 SUBCOMPLEX                                     |
| 1ZL8        | A B                 | A        | NMR STRUCTURE OF L27 HETERODIMER FROM C. ELEGANS LIN-7 AND H. SAPIENS LIN-2 SCAFFO  |
| 2A6Q        | A E                 | A        | CRYSTAL STRUCTURE OF YEFM-YOEB COMPLEX                                              |
| 2AFF        | A B                 | B        | THE SOLUTION STRUCTURE OF THE KI67FHA/HNIFK(226-269)3P COMPLEX                      |
| 2AVU        | B E                 | E        | STRUCTURE OF THE ESCHERICHIA COLI FLHDC COMPLEX, A PROKARYOTIC HETEROMERIC REGI     |
| 2BGN        | B E                 | E        | HIV-1 TAT PROTEIN DERIVED N-TERMINAL NONAPEPTIDE TRP2-TAT (1-9) BOUND TO THE ACTIVE |
| 2BNQ        | A E                 | A        | STRUCTURAL AND KINETIC BASIS FOR HEIGHTENED IMMUNOGENICITY OF T CELL VACCINES       |
| 2BYK        | D C                 | D        | HISTONE FOLD HETERODIMER OF THE CHROMATIN ACCESSIBILITY COMPLEX                     |
| 2BYK        | D C                 | D        | HISTONE FOLD HETERODIMER OF THE CHROMATIN ACCESSIBILITY COMPLEX                     |
| 2C5I        | T P                 | P        | N-TERMINAL DOMAIN OF TLG1 COMPLEXED WITH N-TERMINUS OF VPS51 IN DISTORTED CONFO     |
| 2C9W        | B C                 | C        | CRYSTAL STRUCTURE OF SOCS-2 IN COMPLEX WITH ELONGIN-B AND ELONGIN-C AT 1.9A RESOLI  |
| 2CJS        | A C                 | A        | STRUCTURAL BASIS FOR A MUNC13-1 DIMERIC - MUNC13-1 - RIM HETERODIMER SWITCH: C2-DO  |

TABLE S1

Bullock, et. al

| A. PDB<br>CODE | E. FUNCTION                       | F. $\Delta\Delta G_{\text{AVG,HELIX}}$<br>(KCAL/MOL) | G. $\Delta\Delta G_{\text{SUM,HELIX}}$<br>(KCAL/MOL) | H. $\Delta\Delta G_{\text{SUM,CHAIN}}$<br>(KCAL/MOL) |
|----------------|-----------------------------------|------------------------------------------------------|------------------------------------------------------|------------------------------------------------------|
| 1E7P           | OXIDOREDUCTASE                    | 2.5                                                  | 5.0                                                  | 14.7                                                 |
| 1EFU           | COMPLEX (TWO ELONGATION FACTORS)  | 2.9                                                  | 8.8                                                  | 19.5                                                 |
| 1F80           | TRANSFERASE                       | 2.3                                                  | 9.2                                                  | 12.3                                                 |
| 1FM6           | TRANSCRIPTION                     | 2.0                                                  | 6.1                                                  | 7.6                                                  |
| 1G73           | APOPTOSIS/APOPTOSIS INHIBITOR     | 3.3                                                  | 13.2                                                 | 13.2                                                 |
| 1GX7           | OXIDOREDUCTASE                    | 2.8                                                  | 8.5                                                  | 40.2                                                 |
| 1H4L           | KINASE/KINASE ACTIVATOR           | 2.3                                                  | 6.9                                                  | 9.1                                                  |
| 1HX1           | CHAPERONE/CHAPERONE INHIBITOR     | 2.5                                                  | 4.9                                                  | 11.1                                                 |
| 1I1R           | CYTOKINE                          | 2.3                                                  | 7.0                                                  | 8.2                                                  |
| 1I2M           | CELL CYCLE                        | 2.1                                                  | 8.2                                                  | 13.3                                                 |
| 1I5K           | BLOOD CLOTTING                    | 2.7                                                  | 8.0                                                  | 8.0                                                  |
| 1IBR           | CELL CYCLE,TRANSLATION            | 2.1                                                  | 4.1                                                  | 20.4                                                 |
| 1J7D           | UNKNOWN FUNCTION                  | 2.2                                                  | 6.6                                                  | 6.6                                                  |
| 1JEK           | VIRAL PROTEIN                     | 2.2                                                  | 8.6                                                  | 12.5                                                 |
| 1JYO           | CHAPERONE                         | 2.5                                                  | 5.0                                                  | 6.5                                                  |
| 1LDK           | LIGASE                            | 2.3                                                  | 6.9                                                  | 6.9                                                  |
| 1LQB           | GENE REGULATION                   | 2.3                                                  | 9.0                                                  | 12.1                                                 |
| 1M1E           | STRUCTURAL PROTEIN                | 2.4                                                  | 4.8                                                  | 15.4                                                 |
| 1N1J           | DNA BINDING PROTEIN               | 4.3                                                  | 17.3                                                 | 23.2                                                 |
| 1N1J           | DNA BINDING PROTEIN               | 2.0                                                  | 4.0                                                  | 23.2                                                 |
| 1NGM           | TRANSCRIPTION/DNA                 | 2.6                                                  | 5.2                                                  | 15.8                                                 |
| 1NH2           | TRANSCRIPTION/DNA                 | 2.2                                                  | 8.7                                                  | 20.3                                                 |
| 1NH2           | TRANSCRIPTION/DNA                 | 2.5                                                  | 10.0                                                 | 20.3                                                 |
| 1NH2           | TRANSCRIPTION/DNA                 | 2.3                                                  | 6.8                                                  | 9.3                                                  |
| 1NU7           | HYDROLASE/PROTEIN BINDING         | 2.0                                                  | 6.1                                                  | 15.2                                                 |
| 1NU9           | HYDROLASE/PROTEIN BINDING         | 3.2                                                  | 6.3                                                  | 7.4                                                  |
| 1NVM           | LYASE/OXIDOREDUCTASE              | 2.1                                                  | 6.3                                                  | 17.2                                                 |
| 1OR0           | HYDROLASE                         | 2.2                                                  | 10.8                                                 | 58.0                                                 |
| 1OR7           | TRANSCRIPTION                     | 2.0                                                  | 5.9                                                  | 33.3                                                 |
| 1OXK           | SIGNALING PROTEIN                 | 2.7                                                  | 8.2                                                  | 11.7                                                 |
| 1R4M           | CELL CYCLE                        | 2.1                                                  | 6.3                                                  | 24.4                                                 |
| 1TI2           | OXIDOREDUCTASE                    | 2.1                                                  | 6.3                                                  | 52.3                                                 |
| 1TQY           | TRANSFERASE                       | 2.2                                                  | 8.8                                                  | 30.6                                                 |
| 1TY4           | APOPTOSIS                         | 2.1                                                  | 8.4                                                  | 13.8                                                 |
| 1UKV           | PROTEIN TRANSPORT                 | 2.3                                                  | 9.0                                                  | 18.5                                                 |
| 1VF6           | PROTEIN BINDING/PROTEIN TRANSPORT | 2.0                                                  | 3.9                                                  | 21.9                                                 |
| 1VG9           | PROTEIN BINDING/PROTEIN TRANSPORT | 2.2                                                  | 6.6                                                  | 10.1                                                 |
| 1WA8           | TUBERCULOSIS                      | 4.2                                                  | 12.6                                                 | 29.6                                                 |
| 1WPX           | HYDROLASE                         | 2.4                                                  | 4.7                                                  | 16.8                                                 |
| 1WPX           | HYDROLASE                         | 2.6                                                  | 5.2                                                  | 20.3                                                 |
| 1XB2           | TRANSLATION                       | 2.2                                                  | 6.7                                                  | 10.7                                                 |
| 1XKP           | MEMBRANE PROTEIN/CHAPERON         | 2.1                                                  | 8.5                                                  | 12.2                                                 |
| 1Y76           | TRANSPORT PROTEIN                 | 5.9                                                  | 17.7                                                 | 24.0                                                 |
| 1YDI           | CELL ADHESION, STRUCTURAL PROTEIN | 2.4                                                  | 16.6                                                 | 16.6                                                 |
| 1YKE           | GENE REGULATION                   | 2.9                                                  | 8.7                                                  | 11.9                                                 |
| 1ZL8           | PROTEIN BINDING                   | 2.2                                                  | 4.3                                                  | 25.2                                                 |
| 2A6Q           | TOXIN INHIBITOR/TOXIN             | 2.1                                                  | 8.5                                                  | 15.0                                                 |
| 2AFF           | CELL CYCLE                        | 3.0                                                  | 11.9                                                 | 11.9                                                 |
| 2AVU           | TRANSCRIPTION ACTIVATOR           | 2.8                                                  | 5.5                                                  | 8.4                                                  |
| 2BGN           | HYDROLASE                         | 2.3                                                  | 6.8                                                  | 15.1                                                 |
| 2BNQ           | IMMUNE SYSTEM/RECEPTOR            | 2.2                                                  | 6.6                                                  | 6.6                                                  |
| 2BYK           | DNA-BINDING PROTEIN               | 2.5                                                  | 10.1                                                 | 26.1                                                 |
| 2BYK           | DNA-BINDING PROTEIN               | 2.7                                                  | 5.4                                                  | 26.1                                                 |
| 2C5I           | PROTEIN TRANSPORT                 | 2.1                                                  | 6.4                                                  | 9.4                                                  |
| 2C9W           | TRANSCRIPTION REGULATION          | 2.4                                                  | 4.7                                                  | 12.0                                                 |
| 2CJS           | EXOCYTOSIS                        | 2.1                                                  | 6.2                                                  | 11.6                                                 |



TABLE S1

| A. PDB<br>CODE | I. HELIX<br>CONTRIBUTION | J. # HOTSPOT<br>RESIDUES | K. HOTSPOT RESIDUES, RESIDUE #<br>$\Delta\Delta G$ (KCAL/MOL)                |
|----------------|--------------------------|--------------------------|------------------------------------------------------------------------------|
| 1E7P           | 34%                      | 2                        | Q225, 3.6; V236, 1.4;                                                        |
| 1EFU           | 45%                      | 3                        | F271, 4.4; V275, 3.4; M278, 1.0;                                             |
| 1F80           | 75%                      | 4                        | R21, 1.7; R24, 2.4; F25, 1.2; R28, 3.9;                                      |
| 1FM6           | 80%                      | 3                        | E394, 1.8; Y397, 3.1; E401, 1.2;                                             |
| 1G73           | 100%                     | 4                        | H92, 5.3; Y95, 2.8; L96, 1.3; E99, 3.8;                                      |
| 1GX7           | 21%                      | 3                        | F147, 2.5; W154, 4.1; E155, 1.9;                                             |
| 1H4L           | 76%                      | 3                        | W258, 3.6; L262, 1.8; I265, 1.5;                                             |
| 1HX1           | 44%                      | 2                        | R237, 2.8; D252, 2.1;                                                        |
| 1I1R           | 85%                      | 3                        | L11, 1.1; R15, 2.4; W18, 3.5;                                                |
| 1I2M           | 62%                      | 4                        | N103, 1.0; R106, 3.2; D107, 2.0; R110, 2.0;                                  |
| 1I5K           | 100%                     | 3                        | L310, 2.5; L313, 1.5; R317, 4.0;                                             |
| 1IBR           | 20%                      | 2                        | E281, 2.7; D288, 1.4;                                                        |
| 1J7D           | 100%                     | 3                        | F13, 4.6; E17, 1.0; E20, 1.0;                                                |
| 1JEK           | 69%                      | 4                        | W631, 1.7; I635, 1.3; H638, 3.1; L642, 2.5;                                  |
| 1JYO           | 77%                      | 2                        | E111, 2.2; E118, 2.8;                                                        |
| 1LDK           | 100%                     | 3                        | M43, 1.3; Y46, 1.0; Y50, 4.6;                                                |
| 1LQB           | 74%                      | 4                        | H68, 3.0; M75, 1.1; Y79, 1.4; R82, 3.5;                                      |
| 1MIE           | 31%                      | 2                        | T653, 1.1; F660, 3.7;                                                        |
| 1N1J           | 75%                      | 4                        | Y128, 2.4; L132, 1.5; Y135, 1.4; L136, 12.0;                                 |
| 1N1J           | 17%                      | 2                        | V84, 1.1; I92, 2.9;                                                          |
| 1NGM           | 33%                      | 2                        | S480, 1.5; W487, 3.7;                                                        |
| 1NH2           | 43%                      | 4                        | L38, 2.1; W42, 3.7; K45, 1.6; L46, 1.3;                                      |
| 1NH2           | 49%                      | 4                        | V9, 1.0; Y10, 5.0; I13, 2.4; V17, 1.6;                                       |
| 1NH2           | 73%                      | 3                        | I15, 3.3; L19, 2.0; L26, 1.5;                                                |
| 1NU7           | 40%                      | 3                        | L67, 3.0; Q71, 2.1; L74, 1.0;                                                |
| 1NU9           | 85%                      | 2                        | K59, 4.9; L67, 1.4;                                                          |
| 1NVM           | 37%                      | 3                        | M328, 1.6; D331, 3.6; D335, 1.1;                                             |
| 1OR0           | 19%                      | 5                        | F39, 1.7; Y40, 2.8; Y42, 2.5; Q46, 2.5;                                      |
| 1OR7           | 18%                      | 3                        | I55, 1.9; V59, 1.9; I63, 2.1;                                                |
| 1OXK           | 70%                      | 3                        | V1098, 1.7; R1105, 2.9; M1106, 3.6;                                          |
| 1R4M           | 26%                      | 3                        | T492, 1.3; F496, 1.5; Q503, 3.5;                                             |
| 1TI2           | 12%                      | 3                        | N18, 1.4; D25, 1.5; E26, 3.4;                                                |
| 1TQY           | 29%                      | 4                        | F109, 1.0; F116, 3.8; L119, 1.7; W120, 2.3;                                  |
| 1TY4           | 61%                      | 4                        | I50, 1.5; I54, 3.3; K57, 1.1; L58, 2.5;                                      |
| 1UKV           | 49%                      | 4                        | E241, 1.9; Q244, 2.2; R248, 3.9; I252, 1.0;                                  |
| 1VF6           | 18%                      | 2                        | F159, 1.4; H166, 2.5;                                                        |
| 1VG9           | 65%                      | 3                        | Q382, 1.0; R386, 3.0; V390, 2.6;                                             |
| 1WA8           | 43%                      | 3                        | F17, 1.9; D23, 1.0; L24, 9.7;                                                |
| 1WPX           | 28%                      | 2                        | W231, 3.5; Y239, 1.2;                                                        |
| 1WPX           | 26%                      | 2                        | F507, 4.0; S514, 1.2;                                                        |
| 1XB2           | 63%                      | 3                        | E193, 2.6; L194, 1.7; E198, 2.4;                                             |
| 1XKP           | 70%                      | 4                        | R66, 1.6; M69, 2.9; Q70, 1.3; L73, 2.7;                                      |
| 1Y76           | 74%                      | 3                        | L35, 3.7; F38, 11.8; L42, 2.2;                                               |
| 1YDI           | 100%                     | 7                        | W743, 5.8; L746, 1.5; L747, 2.6; I750, 1.8; I754, 1.7; E758, 1.2; I761, 2.0; |
| 1YKE           | 73%                      | 3                        | M15, 2.6; F19, 4.4; L23, 1.7;                                                |
| 1ZL8           | 17%                      | 2                        | L5, 1.6; L15, 2.7;                                                           |
| 2A6Q           | 57%                      | 4                        | E53, 1.0; E59, 2.9; Y62, 2.6; L63, 2.0;                                      |
| 2AFF           | 100%                     | 4                        | F241, 1.8; L242, 3.9; R245, 2.8; V249, 3.4;                                  |
| 2AVU           | 65%                      | 2                        | V71, 2.1; F82, 3.4;                                                          |
| 2BGN           | 45%                      | 3                        | L132, 2.1; Q135, 2.4; E139, 2.3;                                             |
| 2BNQ           | 100%                     | 3                        | R65, 1.7; Q72, 3.3; T73, 1.6;                                                |
| 2BYK           | 39%                      | 4                        | F81, 3.6; L85, 2.1; L89, 1.1; Y92, 3.3;                                      |
| 2BYK           | 21%                      | 2                        | I37, 1.9; F44, 3.5;                                                          |
| 2C5I           | 68%                      | 3                        | R20, 2.3; L23, 2.5; F27, 1.6;                                                |
| 2C9W           | 39%                      | 2                        | H68, 3.6; R82, 1.1;                                                          |
| 2CJS           | 53%                      | 3                        | E137, 2.1; W141, 2.4; L145, 1.7;                                             |

TABLE S1

Bullock, et. al

| A. PDB CODE | L. HOTSPOT RESIDUE HELIX POSITIONS  | M. HOTSPOT RESIDUE END TO END LENGTH | N. HELIX LENGTH | O. HELIX START RESIDUE # | P. HELIX END RESIDUE # |
|-------------|-------------------------------------|--------------------------------------|-----------------|--------------------------|------------------------|
| 1E7P        | i; i+11;                            | 12                                   | 14              | 224                      | 237                    |
| 1EFU        | i; i+4; i+7;                        | 8                                    | 9               | 271                      | 279                    |
| 1F80        | i; i+3; i+4; i+7;                   | 8                                    | 10              | 21                       | 30                     |
| 1FM6        | i; i+3; i+7;                        | 8                                    | 23              | 386                      | 408                    |
| 1G73        | i; i+3; i+4; i+7;                   | 8                                    | 48              | 72                       | 119                    |
| 1GX7        | i; i+7; i+8;                        | 19                                   | 20              | 146                      | 165                    |
| 1H4L        | i; i+4; i+7;                        | 8                                    | 15              | 254                      | 268                    |
| 1HX1        | i; i+15;                            | 6                                    | 27              | 231                      | 257                    |
| 1I1R        | i; i+4; i+7;                        | 7                                    | 27              | 9                        | 35                     |
| 1I2M        | i; i+3; i+4; i+7;                   | 14                                   | 13              | 101                      | 113                    |
| 1I5K        | i; i+3; i+7;                        | 12                                   | 22              | 306                      | 327                    |
| 1IBR        | i; i+7;                             | 6                                    | 26              | 273                      | 298                    |
| 1J7D        | i; i+4; i+7;                        | 8                                    | 15              | 11                       | 25                     |
| 1JEK        | i; i+4; i+7; i+11;                  | 11                                   | 33              | 629                      | 661                    |
| 1JYO        | i; i+7;                             | 6                                    | 22              | 103                      | 124                    |
| 1LDK        | i; i+3; i+7;                        | 8                                    | 14              | 40                       | 53                     |
| 1LQB        | i; i+7; i+11; i+14;                 | 8                                    | 17              | 67                       | 83                     |
| 1MIE        | i; i+7;                             | 6                                    | 15              | 649                      | 663                    |
| 1N1J        | i; i+4; i+7; i+8;                   | 7                                    | 15              | 126                      | 140                    |
| 1N1J        | i; i+8;                             | 7                                    | 29              | 78                       | 106                    |
| 1NGM        | i; i+7;                             | 8                                    | 15              | 477                      | 491                    |
| 1NH2        | i; i+4; i+7; i+8;                   | 9                                    | 17              | 32                       | 48                     |
| 1NH2        | i; i+1; i+4; i+8;                   | 12                                   | 18              | 4                        | 21                     |
| 1NH2        | i; i+4; i+11;                       | 7                                    | 16              | 14                       | 29                     |
| 1NU7        | i; i+4; i+7;                        | 6                                    | 40              | 56                       | 95                     |
| 1NU9        | i; i+8;                             | 6                                    | 40              | 56                       | 95                     |
| 1NVM        | i; i+3; i+7;                        | 8                                    | 15              | 326                      | 340                    |
| 1OR0        | i; i+1; i+3; i+7;                   | 6                                    | 16              | 35                       | 50                     |
| 1OR7        | i; i+4; i+8;                        | 17                                   | 11              | 55                       | 65                     |
| 1OXK        | i; i+7; i+8;                        | 16                                   | 14              | 1097                     | 1110                   |
| 1R4M        | i; i+4; i+11;                       | 8                                    | 21              | 491                      | 511                    |
| 1TI2        | i; i+7; i+8;                        | 8                                    | 12              | 18                       | 29                     |
| 1TQY        | i; i+7; i+10; i+11;                 | 8                                    | 15              | 109                      | 123                    |
| 1TY4        | i; i+4; i+7; i+8;                   | 8                                    | 11              | 50                       | 60                     |
| 1UKV        | i; i+3; i+7; i+11;                  | 8                                    | 15              | 239                      | 253                    |
| 1VF6        | i; i+7;                             | 18                                   | 13              | 157                      | 169                    |
| 1VG9        | i; i+4; i+8;                        | 6                                    | 15              | 377                      | 391                    |
| 1WA8        | i; i+6; i+7;                        | 8                                    | 34              | 7                        | 40                     |
| 1WPX        | i; i+8;                             | 12                                   | 22              | 230                      | 251                    |
| 1WPX        | i; i+7;                             | 11                                   | 12              | 507                      | 518                    |
| 1XB2        | i; i+1; i+5;                        | 7                                    | 14              | 193                      | 206                    |
| 1XKP        | i; i+3; i+4; i+7;                   | 16                                   | 14              | 62                       | 75                     |
| 1Y76        | i; i+3; i+7;                        | 8                                    | 15              | 30                       | 44                     |
| 1YDI        | i; i+3; i+4; i+7; i+11; i+15; i+18; | 8                                    | 22              | 743                      | 764                    |
| 1YKE        | i; i+4; i+8;                        | 8                                    | 22              | 4                        | 25                     |
| 1ZL8        | i; i+10;                            | 15                                   | 17              | 4                        | 20                     |
| 2A6Q        | i; i+6; i+9; i+10;                  | 9                                    | 16              | 51                       | 66                     |
| 2AFF        | i; i+1; i+4; i+8;                   | 8                                    | 14              | 239                      | 252                    |
| 2AVU        | i; i+11;                            | 12                                   | 20              | 67                       | 86                     |
| 2BGN        | i; i+3; i+7;                        | 9                                    | 19              | 126                      | 144                    |
| 2BNQ        | i; i+7; i+8;                        | 19                                   | 29              | 57                       | 85                     |
| 2BYK        | i; i+4; i+8; i+11;                  | 9                                    | 19              | 79                       | 97                     |
| 2BYK        | i; i+7;                             | 9                                    | 29              | 31                       | 59                     |
| 2C5I        | i; i+3; i+7;                        | 19                                   | 14              | 16                       | 29                     |
| 2C9W        | i; i+14;                            | 12                                   | 17              | 67                       | 83                     |
| 2CJS        | i; i+4; i+8;                        | 11                                   | 20              | 135                      | 154                    |

| A. PDB<br>CODE | Q. HELIX SEQUENCE                                 | R. RESOLUTION |
|----------------|---------------------------------------------------|---------------|
| 1E7P           | LQSKIAYLRRKMVS                                    | 3.10          |
| 1EFU           | FAAEVAAMS                                         | 2.50          |
| 1F80           | RQKRFAERIL                                        | 2.30          |
| 1FM6           | PAEVEALREKVYASLEAYCKHKY                           | 2.10          |
| 1G73           | EEEDVWQVIIGARAEMTSKHQEYLLKLETTWMTAVGLSEMAAEEAAYQT | 2.00          |
| 1GX7           | EFTADVTIWEEGSEFVERLT                              | NOT APP       |
| 1H4L           | KEAFWDRCLSVINLM                                   | 2.65          |
| 1HX1           | KDSRLKRRKGLVKKVQAFLAECDTVEQN                      | 1.90          |
| 1I1R           | KDLLIQRLNWMLWVIDEFCRDLCYRTG                       | 2.40          |
| 1I2M           | VPNWHRDLVRVCE                                     | 1.76          |
| 1I5K           | ADAELQRLKNERHEEAELERLK                            | 2.70          |
| 1IBR           | DEVALQGIEFWSNVCDEEMDLAIEAS                        | 2.30          |
| 1J7D           | RNFRLLLEELEGQKG                                   | 1.85          |
| 1JEK           | QQWEEIEIQHEGNLSLLLREAALQVHIAQRDAR                 | 1.50          |
| 1JYO           | TYHISQLESFVNQEQEALKNIL                            | 1.90          |
| 1LDK           | SRYMELYTHVYNYC                                    | 3.10          |
| 1LQB           | SHVLSKVCMYFTYKVRVY                                | 2.00          |
| 1M1E           | EGVATYAAAVLFRMS                                   | 2.10          |
| 1N1J           | DSYVEPLKLYLQKFR                                   | 1.67          |
| 1N1J           | KDAKECVQECVSEFISFITSEASERCHQE                     | 1.67          |
| 1NGM           | EEASKLKERIWIGLN                                   | 2.95          |
| 1NH2           | EQTLQDLKNIWQKKLTE                                 | 1.90          |
| 1NH2           | AEASRVYEIIVESVVNEV                                | 1.90          |
| 1NH2           | TIGNSLVDALDTLISD                                  | 1.90          |
| 1NU7           | KDAKDKLMTRILGEDQYLLERKKVQYEEYKKLYKKYKEEN          | 2.20          |
| 1NU9           | KDAKDKLMTRILGEDQYLLERKKVQYEEYKKLYKKYKEEN          | 2.20          |
| 1NVM           | EDMIVDVALDLAAH                                    | 1.70          |
| 1OR0           | APSAFYGYGWAQARSH                                  | 2.00          |
| 1OR7           | ISSRVMAAIEE                                       | 2.00          |
| 1OXK           | HVNQEVIKRMLNLE                                    | 2.10          |
| 1R4M           | HTIAAFLGGAAAQEVIKIITK                             | 3.00          |
| 1TI2           | NCFMGCMDHEEL                                      | 2.35          |
| 1TQY           | FDFTHREFRKLWSEG                                   | 2.00          |
| 1TY4           | IGYEIGSKLAA                                       | 2.20          |
| 1UKV           | LGELPQGFARLSAIY                                   | 1.50          |
| 1VF6           | RDFQNAFKIHNAV                                     | 2.10          |
| 1VG9           | QGELPQCFCRMCAVF                                   | 2.50          |
| 1WA8           | AATLAQEAGNFERISGDLKTQIDQVESTAGSLQG                | NOT APP       |
| 1WPX           | VWSCVPATIIYCENNAQLAPYQRT                          | 2.70          |
| 1WPX           | FAQASIDSYKKH                                      | 2.70          |
| 1XB2           | ELVELEIRELLTEF                                    | 2.20          |
| 1XKP           | VTLLRSLMQQALAW                                    | 1.70          |
| 1Y76           | TQNEKLSAFYETLKS                                   | NOT APP       |
| 1YDI           | WEQLTTIARTINEVENQILTR                             | 1.80          |
| 1YKE           | RLTQLQICLDQMTEQFCATLNY                            | 3.30          |
| 1ZL8           | NLERDVQRILELMEHVQ                                 | NOT APP       |
| 2A6Q           | LEEYNSLEETAYLLRS                                  | 2.05          |
| 2AFF           | PTFLERRKSQVAEL                                    | NOT APP       |
| 2AVU           | WEQNVHASMFCAWQFLLKT                               | 3.00          |
| 2BGN           | PDEVVSLVNQGLQEGERDF                               | 3.15          |
| 2BNQ           | PEYWDGETRKKVKAHSQTHRVDLGTLRGYY                    | 1.70          |
| 2BYK           | ESFVPSLTQDLEVYRKVVK                               | 2.40          |
| 2BYK           | KEARAAIARAASVFAIFVTSSTALAHKQ                      | 2.40          |
| 2C5I           | LNKDRRLLREFYN                                     | 2.30          |
| 2C9W           | SHVLSKVCMYFTYKVRVY                                | 1.90          |
| 2CJS           | EEEARVWAKKLEQLNAKLNS                              | 1.78          |

| A. PDB CODE | B. INTERFACE CHAINS | C. CHAIN | D. TITLE                                                                            |
|-------------|---------------------|----------|-------------------------------------------------------------------------------------|
| 2D10        | A E                 | E        | CRYSTAL STRUCTURE OF THE RADIXIN FERM DOMAIN COMPLEXED WITH THE NHERF-1 C-TERM      |
| 2DOI        | X C                 | C        | THE X-RAY CRYSTALLOGRAPHIC STRUCTURE OF THE ANGIOGENESIS INHIBITOR, ANGIOSTATIN,    |
| 2DSR        | B I                 | I        | STRUCTURAL BASIS FOR THE INHIBITION OF INSULIN-LIKE GROWTH FACTORS BY IGF BINDING 1 |
| 2E9X        | A C                 | A        | THE CRYSTAL STRUCTURE OF HUMAN GINS CORE COMPLEX                                    |
| 2E9X        | A D                 | A        | THE CRYSTAL STRUCTURE OF HUMAN GINS CORE COMPLEX                                    |
| 2E9X        | A D                 | D        | THE CRYSTAL STRUCTURE OF HUMAN GINS CORE COMPLEX                                    |
| 2E9X        | A D                 | D        | THE CRYSTAL STRUCTURE OF HUMAN GINS CORE COMPLEX                                    |
| 2E9X        | B C                 | B        | THE CRYSTAL STRUCTURE OF HUMAN GINS CORE COMPLEX                                    |
| 2E9X        | B C                 | C        | THE CRYSTAL STRUCTURE OF HUMAN GINS CORE COMPLEX                                    |
| 2EFC        | A B                 | A        | ARA7-GDP/ATVPS9A                                                                    |
| 2EHB        | A D                 | A        | THE STRUCTURE OF THE C-TERMINAL DOMAIN OF THE PROTEIN KINASE ATOS2 BOUND TO THE     |
| 2EHO        | B D                 | B        | CRYSTAL STRUCTURE OF HUMAN GINS COMPLEX                                             |
| 2EHO        | E F                 | E        | CRYSTAL STRUCTURE OF HUMAN GINS COMPLEX                                             |
| 2EQB        | A B                 | B        | CRYSTAL STRUCTURE OF THE RAB GTPASE SEC4P, THE SEC2P GEF DOMAIN, AND PHOSPHATE CO   |
| 2ES4        | A D                 | D        | CRYSTAL STRUCTURE OF THE BURKHOLDERIA GLUMAE LIPASE- SPECIFIC FOLDASE IN COMPLE     |
| 2FK0        | Q R                 | R        | CRYSTAL STRUCTURE OF A H5N1 INFLUENZA VIRUS HEMAGGLUTININ.                          |
| 2FO1        | A D                 | D        | CRYSTAL STRUCTURE OF THE CSL-NOTCH-MASTERMIND TERNARY COMPLEX BOUND TO DNA          |
| 2G38        | A B                 | B        | A PE/PPE PROTEIN COMPLEX FROM MYCOBACTERIUM TUBERCULOSIS                            |
| 2GMI        | A B                 | B        | MMS2/UBC13~UBIQUITIN                                                                |
| 2GOX        | C D                 | D        | CRYSTAL STRUCTURE OF EFB-C / C3D COMPLEX                                            |
| 2HQW        | A B                 | B        | CRYSTAL STRUCTURE OF CA2+/CALMODULIN BOUND TO NMDA RECEPTOR NR1C1 PEPTIDE           |
| 2HUE        | B C                 | B        | STRUCTURE OF THE H3-H4 CHAPERONE ASF1 BOUND TO HISTONES H3 AND H4                   |
| 2HV8        | A D                 | D        | CRYSTAL STRUCTURE OF GTP-BOUND RAB11 IN COMPLEX WITH FIP3                           |
| 2I2R        | B F                 | F        | CRYSTAL STRUCTURE OF THE KCHIP1/KV4.3 T1 COMPLEX                                    |
| 2IZV        | B C                 | C        | CRYSTAL STRUCTURE OF SOCS-4 IN COMPLEX WITH ELONGIN-B AND ELONGIN-C AT 2.55A RESOI  |
| 2JFA        | A P                 | P        | ESTROGEN RECEPTOR ALPHA LBD IN COMPLEX WITH AN AFFINITY- SELECTED COREPRESSOR PE    |
| 2JRI        | A C                 | A        | SOLUTION STRUCTURE OF THE JOSEPHIN DOMAIN OF ATAXIN-3 IN COMPLEX WITH UBIQUITIN M   |
| 2K2I        | A B                 | B        | NMR SOLUTION STRUCTURE OF THE C-TERMINAL DOMAIN (T94-Y172) OF THE HUMAN CENTRIN     |
| 2NNU        | A B                 | B        | CRYSTAL STRUCTURE OF THE PAPILLOMAVIRUS DNA TETHERING COMPLEX E2:BRD4               |
| 2NOJ        | A B                 | B        | CRYSTAL STRUCTURE OF EHP / C3D COMPLEX                                              |
| 2O8A        | B J                 | J        | RAT PP1CGAMMA COMPLEXED WITH MOUSE INHIBITOR-2                                      |
| 2OF5        | E K                 | E        | OLIGOMERIC DEATH DOMAIN COMPLEX                                                     |
| 2OT3        | A B                 | A        | CRYSTAL STRUCTURE OF RABEX-5 VPS9 DOMAIN IN COMPLEX WITH NUCLEOTIDE FREE RAB21      |
| 2PBI        | A B                 | A        | THE MULTIFUNCTIONAL NATURE OF GBETA5/RGS9 REVEALED FROM ITS CRYSTAL STRUCTURE       |
| 2PJW        | H V                 | H        | THE VPS27/HSE1 COMPLEX IS A GAT DOMAIN-BASED SCAFFOLD FOR UBIQUITIN-DEPENDENT SOI   |
| 2PQN        | A B                 | B        | CRYSTAL STRUCTURE OF YEAST FIS1 COMPLEXED WITH A FRAGMENT OF YEAST MDV1             |
| 2PQR        | A C                 | C        | CRYSTAL STRUCTURE OF YEAST FIS1 COMPLEXED WITH A FRAGMENT OF YEAST CAF4             |
| 2QIY        | A C                 | C        | YEAST DEUBIQUITINASE UBP3 AND BRE5 COFACTOR COMPLEX                                 |
| 2QLV        | A B                 | A        | CRYSTAL STRUCTURE OF THE HETEROTRIMER CORE OF THE S. CEREVISIAE AMPK HOMOLOG SN     |
| 2R17        | A C                 | C        | FUNCTIONAL ARCHITECTURE OF THE RETROMER CARGO-RECOGNITION COMPLEX                   |
| 2SIV        | C D                 | C        | SIV GP41 CORE STRUCTURE                                                             |
| 2V1D        | A B                 | A        | STRUCTURAL BASIS OF LSD1-COREST SELECTIVITY IN HISTONE H3 RECOGNITION               |
| 2VE7        | A C                 | A        | CRYSTAL STRUCTURE OF A BONSAI VERSION OF THE HUMAN NDC80 COMPLEX                    |
| 2VE7        | A C                 | A        | CRYSTAL STRUCTURE OF A BONSAI VERSION OF THE HUMAN NDC80 COMPLEX                    |
| 2VE7        | A C                 | C        | CRYSTAL STRUCTURE OF A BONSAI VERSION OF THE HUMAN NDC80 COMPLEX                    |
| 2VGO        | A D                 | D        | CRYSTAL STRUCTURE OF AURORA B KINASE IN COMPLEX WITH REVERSINE INHIBITOR            |
| 2WAX        | A B                 | B        | STRUCTURE OF THE HUMAN DDX6 C-TERMINAL DOMAIN IN COMPLEX WITH AN EDC3-FDF PEPTI     |
| 2WIN        | H N                 | N        | C3 CONVERTASE (C3BBB) STABILIZED BY SCIN                                            |
| 2WME        | D C                 | D        | CRYSTALLOGRAPHIC STRUCTURE OF BETAINE ALDEHYDE DEHYDROGENASE FROM PSEUDOMO          |
| 2Z2T        | A D                 | A        | CRYSTAL STRUCTURE OF THE COMPLEX BETWEEN GP41 FRAGMENT N36 AND FUSION INHIBITOF     |
| 2Z3R        | C D                 | C        | CRYSTAL STRUCTURE OF THE IL-15/IL-15RA COMPLEX                                      |
| 2ZL1        | A B                 | B        | MP1-P14 SCAFFOLDING COMPLEX                                                         |
| 3BEG        | A B                 | A        | CRYSTAL STRUCTURE OF SR PROTEIN KINASE 1 COMPLEXED TO ITS SUBSTRATE ASF/SF2         |
| 3BOW        | B C                 | B        | STRUCTURE OF M-CALPAIN IN COMPLEX WITH CALPASTATIN                                  |
| 3BRT        | A B                 | B        | NEMO/IKK ASSOCIATION DOMAIN STRUCTURE                                               |
| 3BRV        | A B                 | B        | NEMO/IKKB ASSOCIATION DOMAIN STRUCTURE                                              |

TABLE S1

Bullock, et. al

| A. PDB<br>CODE | E. FUNCTION                            | F. $\Delta\Delta G_{\text{AVG,HELIX}}$<br>(KCAL/MOL) | G. $\Delta\Delta G_{\text{SUM,HELIX}}$<br>(KCAL/MOL) | H. $\Delta\Delta G_{\text{SUM,CHAIN}}$<br>(KCAL/MOL) |
|----------------|----------------------------------------|------------------------------------------------------|------------------------------------------------------|------------------------------------------------------|
| 2D10           | CELL ADHESION                          | 2.9                                                  | 8.6                                                  | 9.9                                                  |
| 2DOI           | HYDROLASE                              | 2.0                                                  | 6.1                                                  | 6.1                                                  |
| 2DSR           | PROTEIN BINDING/HORMONE/GROWTH FACTOR  | 2.4                                                  | 4.7                                                  | 8.0                                                  |
| 2E9X           | REPLICATION                            | 2.0                                                  | 8.0                                                  | 13.1                                                 |
| 2E9X           | REPLICATION                            | 2.2                                                  | 4.3                                                  | 15.1                                                 |
| 2E9X           | REPLICATION                            | 2.6                                                  | 10.4                                                 | 21.8                                                 |
| 2E9X           | REPLICATION                            | 2.5                                                  | 7.4                                                  | 21.8                                                 |
| 2E9X           | REPLICATION                            | 2.1                                                  | 4.1                                                  | 27.3                                                 |
| 2E9X           | REPLICATION                            | 2.4                                                  | 14.2                                                 | 32.0                                                 |
| 2EFC           | TRANSPORT PROTEIN                      | 2.7                                                  | 8.0                                                  | 15.5                                                 |
| 2EHB           | SIGNALLING PROTEIN/TRANSFERASE         | 2.0                                                  | 5.9                                                  | 17.9                                                 |
| 2EHO           | REPLICATION                            | 3.6                                                  | 10.7                                                 | 14.4                                                 |
| 2EHO           | REPLICATION                            | 2.4                                                  | 4.7                                                  | 15.7                                                 |
| 2EQB           | ENDOCYTOSIS/EXOCYTOSIS                 | 2.3                                                  | 6.9                                                  | 6.9                                                  |
| 2ES4           | HYDROLASE                              | 2.0                                                  | 4.0                                                  | 9.5                                                  |
| 2FK0           | VIRAL PROTEIN                          | 2.0                                                  | 3.9                                                  | 10.6                                                 |
| 2FO1           | GENE REGULATION/SIGNALLING PROTEIN/DNA | 2.2                                                  | 4.4                                                  | 5.4                                                  |
| 2G38           | STRUCTURAL GENOMICS, UNKNOWN FUNCTION  | 2.4                                                  | 7.2                                                  | 22.9                                                 |
| 2GMI           | LIGASE, HUMAN PROTEIN                  | 2.6                                                  | 7.9                                                  | 9.5                                                  |
| 2GOX           | CELL ADHESION/TOXIN                    | 2.3                                                  | 6.8                                                  | 8.0                                                  |
| 2HQW           | METAL BINDING PROTEIN                  | 3.2                                                  | 12.6                                                 | 14.5                                                 |
| 2HUE           | DNA BINDING PROTEIN                    | 3.1                                                  | 9.3                                                  | 24.8                                                 |
| 2HV8           | PROTEIN TRANSPORT                      | 2.4                                                  | 7.2                                                  | 7.2                                                  |
| 2I2R           | TRANSPORT PROTEIN                      | 3.7                                                  | 7.3                                                  | 46.4                                                 |
| 2IZV           | TRANSCRIPTION                          | 2.0                                                  | 6.1                                                  | 10.3                                                 |
| 2JFA           | TRANSCRIPTION                          | 2.3                                                  | 6.8                                                  | 6.8                                                  |
| 2JRI           | HYDROLASE/SIGNALING PROTEIN            | 2.0                                                  | 6.0                                                  | 17.9                                                 |
| 2K2I           | CELL CYCLE                             | 4.6                                                  | 9.2                                                  | 9.2                                                  |
| 2NNU           | TRANSCRIPTION                          | 2.6                                                  | 10.2                                                 | 14.3                                                 |
| 2NOJ           | IMMUNE SYSTEM                          | 2.0                                                  | 6.1                                                  | 6.1                                                  |
| 2O8A           | HYDROLASE/INHIBITOR                    | 2.1                                                  | 6.4                                                  | 25.3                                                 |
| 2OF5           | APOPTOSIS                              | 2.8                                                  | 5.5                                                  | 9.3                                                  |
| 2OT3           | PROTEIN TRANSPORT                      | 2.7                                                  | 5.4                                                  | 11.2                                                 |
| 2PBI           | SIGNALING PROTEIN                      | 2.4                                                  | 7.1                                                  | 45.7                                                 |
| 2PJW           | ENDOCYTOSIS/EXOCYTOSIS                 | 2.2                                                  | 6.6                                                  | 28.3                                                 |
| 2PQN           | APOPTOSIS                              | 2.4                                                  | 12.2                                                 | 14.1                                                 |
| 2PQR           | APOPTOSIS                              | 3.2                                                  | 12.6                                                 | 12.6                                                 |
| 2QIY           | SIGNALING PROTEIN/HYDROLASE            | 2.4                                                  | 7.1                                                  | 14.8                                                 |
| 2QLV           | TRANSFERASE/PROTEIN BINDING            | 2.6                                                  | 5.1                                                  | 11.9                                                 |
| 2R17           | PROTEIN TRANSPORT                      | 2.3                                                  | 4.5                                                  | 9.5                                                  |
| 2SIV           | ENVELOPE GLYCOPROTEIN                  | 2.1                                                  | 8.2                                                  | 9.6                                                  |
| 2V1D           | OXIDOREDUCTASE/REPRESSOR               | 2.0                                                  | 5.9                                                  | 23.3                                                 |
| 2VE7           | CELL CYCLE                             | 2.4                                                  | 7.2                                                  | 30.1                                                 |
| 2VE7           | CELL CYCLE                             | 2.0                                                  | 4.0                                                  | 30.1                                                 |
| 2VE7           | CELL CYCLE                             | 2.6                                                  | 5.1                                                  | 28.9                                                 |
| 2VGO           | TRANSFERASE                            | 2.5                                                  | 4.9                                                  | 20.1                                                 |
| 2WAX           | HYDROLASE                              | 2.3                                                  | 6.8                                                  | 18.7                                                 |
| 2WIN           | IMMUNE SYSTEM                          | 2.0                                                  | 6.1                                                  | 10.8                                                 |
| 2WME           | OXIDOREDUCTASE                         | 2.3                                                  | 4.5                                                  | 18.4                                                 |
| 2Z2T           | VIRAL PROTEIN/INHIBITOR                | 2.4                                                  | 9.4                                                  | 9.4                                                  |
| 2Z3R           | CYTOKINE/CYTOKINE RECEPTOR             | 2.8                                                  | 8.3                                                  | 10.4                                                 |
| 2ZL1           | PROTEIN BINDING                        | 2.0                                                  | 6.1                                                  | 14.4                                                 |
| 3BEG           | TRANSFERASE/SPLICING                   | 3.5                                                  | 7.0                                                  | 12.4                                                 |
| 3BOW           | HYDROLASE/HYDROLASE INHIBITOR          | 2.0                                                  | 5.9                                                  | 13.7                                                 |
| 3BRT           | TRANSFERASE/TRANSCRIPTION              | 2.5                                                  | 4.9                                                  | 7.8                                                  |
| 3BRV           | TRANSFERASE/TRANSCRIPTION              | 2.0                                                  | 8.0                                                  | 12.7                                                 |

TABLE S1

| A. PDB<br>CODE | I. HELIX<br>CONTRIBUTION | J. # HOTSPOT<br>RESIDUES | K. HOTSPOT RESIDUES, RESIDUE #<br>$\Delta\Delta G_{(KCAL/MOL)}$         |
|----------------|--------------------------|--------------------------|-------------------------------------------------------------------------|
| 2D10           | 87%                      | 3                        | W348, 2.8; K351, 1.7; F355, 4.1;                                        |
| 2DOI           | 100%                     | 3                        | L310, 3.1; K314, 1.9; H318, 1.1;                                        |
| 2DSR           | 59%                      | 2                        | E9, 1.4; F16, 3.3;                                                      |
| 2E9X           | 61%                      | 4                        | R71, 3.3; R74, 1.9; Y81, 1.3; R86, 1.5;                                 |
| 2E9X           | 28%                      | 2                        | W113, 2.2; Y124, 2.1;                                                   |
| 2E9X           | 48%                      | 4                        | F129, 3.3; F133, 2.8; Y140, 3.1; L141, 1.2;                             |
| 2E9X           | 34%                      | 3                        | Y87, 3.4; R94, 2.5; L97, 1.5;                                           |
| 2E9X           | 15%                      | 2                        | W121, 1.9; R129, 2.2;                                                   |
| 2E9X           | 44%                      | 6                        | M1171, 1.3; L1175, 3.6; K1181, 1.2; D1185, 1.3; F1186, 2.8; W1189, 4.0; |
| 2EFC           | 52%                      | 3                        | Y225, 4.7; T228, 1.0; F236, 2.3;                                        |
| 2EHB           | 33%                      | 3                        | L132, 1.6; L139, 2.0; E142, 2.3;                                        |
| 2EHO           | 74%                      | 3                        | R74, 1.0; D82, 1.1;                                                     |
| 2EHO           | 30%                      | 2                        | Y87, 3.3; R94, 1.4;                                                     |
| 2EQB           | 100%                     | 3                        | E102, 2.4; D103, 1.3; F109, 3.2;                                        |
| 2ES4           | 42%                      | 2                        | R268, 1.0; D276, 3.0;                                                   |
| 2FK0           | 37%                      | 2                        | V100, 1.9; H111, 2.0;                                                   |
| 2FO1           | 81%                      | 2                        | R71, 2.3; Y81, 2.1;                                                     |
| 2G38           | 31%                      | 3                        | W31, 3.5; E37, 2.0; F45, 1.7;                                           |
| 2GMI           | 83%                      | 3                        | L11, 1.0; E18, 1.4; F8, 5.5;                                            |
| 2GOX           | 85%                      | 3                        | H130, 2.1; R131, 1.9; N138, 2.8;                                        |
| 2HQW           | 87%                      | 4                        | T879, 1.5; F880, 5.0; L887, 4.6; S890, 1.5;                             |
| 2HUE           | 38%                      | 3                        | F67, 4.9; I74, 1.4; F78, 3.0;                                           |
| 2HV8           | 100%                     | 3                        | Q735, 1.0; D739, 4.0; M746, 2.2;                                        |
| 2I2R           | 16%                      | 2                        | F111, 6.2; L118, 1.1;                                                   |
| 2IZV           | 59%                      | 3                        | S67, 1.3; H68, 3.6; R82, 1.2;                                           |
| 2JFA           | 100%                     | 3                        | L13, 2.1; L5, 1.2; I9, 3.5;                                             |
| 2JRI           | 34%                      | 3                        | V31, 1.4; S34, 1.5; H38, 3.1;                                           |
| 2K2I           | 100%                     | 2                        | L651, 2.2; W658, 7.0;                                                   |
| 2NNU           | 71%                      | 4                        | I1345, 2.2; F1349, 3.3; D1352, 2.3; L1353, 2.4;                         |
| 2NOJ           | 100%                     | 3                        | H74, 1.7; R75, 1.3; N82, 3.1;                                           |
| 2O8A           | 25%                      | 3                        | K137, 2.1; F141, 2.4; H148, 1.9;                                        |
| 2OF5           | 59%                      | 2                        | R118, 3.1; Q125, 2.4;                                                   |
| 2OT3           | 48%                      | 2                        | Y354, 3.6; F365, 1.8;                                                   |
| 2PBI           | 16%                      | 3                        | E69, 2.8; L73, 1.0; F76, 3.3;                                           |
| 2PJW           | 23%                      | 3                        | L359, 2.6; E363, 1.6; Y366, 2.4;                                        |
| 2PQN           | 87%                      | 5                        | L148, 1.6; F149, 4.0; F152, 3.9; Y155, 1.5; L156, 1.2;                  |
| 2PQR           | 100%                     | 4                        | L126, 2.3; F127, 4.6; F130, 4.0; I137, 1.7;                             |
| 2QIY           | 48%                      | 3                        | E216, 1.8; F217, 2.4; R224, 2.9;                                        |
| 2QLV           | 43%                      | 2                        | L516, 2.5; Y523, 2.6;                                                   |
| 2R17           | 47%                      | 2                        | F534, 3.4; F541, 1.1;                                                   |
| 2SIV           | 85%                      | 4                        | V558, 1.0; L565, 1.8; W571, 2.3; L576, 3.1;                             |
| 2V1D           | 25%                      | 3                        | F478, 2.8; R485, 1.9; D486, 1.2;                                        |
| 2VE7           | 24%                      | 3                        | L1128, 1.0; Y1138, 3.8; L1142, 2.4;                                     |
| 2VE7           | 13%                      | 2                        | W187, 2.1; I194, 1.9;                                                   |
| 2VE7           | 18%                      | 2                        | F82, 3.5; I98, 1.6;                                                     |
| 2VGO           | 24%                      | 2                        | L807, 1.2; Y815, 3.7;                                                   |
| 2WAX           | 36%                      | 3                        | K215, 1.9; F219, 3.4; I222, 1.5;                                        |
| 2WIN           | 56%                      | 3                        | F60, 2.7; K61, 1.5; Y68, 1.9;                                           |
| 2WME           | 24%                      | 2                        | R269, 2.8; M276, 1.7;                                                   |
| 2Z2T           | 100%                     | 4                        | Q1551, 1.0; L1565, 4.2; L1568, 2.2; W1571, 2.0;                         |
| 2Z3R           | 80%                      | 3                        | E46, 3.6; V49, 1.0; E53, 3.7;                                           |
| 2ZL1           | 42%                      | 3                        | I48, 1.5; I52, 1.8; Y56, 2.8;                                           |
| 3BEG           | 56%                      | 2                        | D564, 3.6; E571, 3.4;                                                   |
| 3BOW           | 43%                      | 3                        | F103, 1.4; L106, 2.7; L110, 1.8;                                        |
| 3BRT           | 63%                      | 2                        | R75, 2.0; L93, 2.9;                                                     |
| 3BRV           | 63%                      | 4                        | R75, 2.4; F82, 2.1; E89, 1.3; F92, 2.2;                                 |

TABLE S1

Bullock, et. al

| A. PDB<br>CODE | L. HOTSPOT RESIDUE<br>HELIX POSITIONS | M. HOTSPOT RESIDUE<br>END TO END LENGTH | N. HELIX<br>LENGTH | O. HELIX START<br>RESIDUE # | P. HELIX END<br>RESIDUE # |
|----------------|---------------------------------------|-----------------------------------------|--------------------|-----------------------------|---------------------------|
| 2D10           | i; i+3; i+7;                          | 8                                       | 10                 | 348                         | 357                       |
| 2DOI           | i; i+4; i+8;                          | 12                                      | 20                 | 307                         | 326                       |
| 2DSR           | i; i+7;                               | 8                                       | 12                 | 8                           | 19                        |
| 2E9X           | i; i+3; i+10; i+15;                   | 9                                       | 37                 | 58                          | 94                        |
| 2E9X           | i; i+11;                              | 8                                       | 22                 | 108                         | 129                       |
| 2E9X           | i; i+4; i+11; i+12;                   | 7                                       | 24                 | 124                         | 147                       |
| 2E9X           | i; i+7; i+10;                         | 17                                      | 32                 | 72                          | 103                       |
| 2E9X           | i; i+8;                               | 8                                       | 29                 | 110                         | 138                       |
| 2E9X           | i; i+4; 11; 15; 16; 19;               | 7                                       | 22                 | 1170                        | 1191                      |
| 2EFC           | i; i+3; i+11;                         | 8                                       | 18                 | 222                         | 239                       |
| 2EHB           | i; i+7; i+10;                         | 8                                       | 15                 | 129                         | 143                       |
| 2EHO           | i; i+8;                               | 6                                       | 35                 | 58                          | 92                        |
| 2EHO           | i; i+7;                               | 9                                       | 14                 | 84                          | 97                        |
| 2EQB           | i; i+1; i+7;                          | 11                                      | 54                 | 84                          | 137                       |
| 2ES4           | i; i+8;                               | 9                                       | 35                 | 263                         | 297                       |
| 2FK0           | i; i+11;                              | 17                                      | 24                 | 94                          | 117                       |
| 2FO1           | i; i+10;                              | 7                                       | 17                 | 68                          | 84                        |
| 2G38           | i; i+6; i+14;                         | 19                                      | 29                 | 22                          | 50                        |
| 2GMI           | i; i+3; i+10;                         | 6                                       | 14                 | 6                           | 19                        |
| 2GOX           | i; i+1; i+8;                          | 11                                      | 14                 | 127                         | 140                       |
| 2HQW           | i; i+1; i+8; i+11;                    | 12                                      | 16                 | 877                         | 892                       |
| 2HUE           | i; i+7; i+11;                         | 7                                       | 16                 | 64                          | 79                        |
| 2HV8           | i; i+4; i+11;                         | 8                                       | 31                 | 717                         | 747                       |
| 2I2R           | i; i+7;                               | 6                                       | 14                 | 108                         | 121                       |
| 2IZV           | i; i+1; i+15;                         | 9                                       | 17                 | 67                          | 83                        |
| 2JFA           | i; i+4; i+8;                          | 13                                      | 13                 | 2                           | 14                        |
| 2JRI           | i; i+3; i+7;                          | 17                                      | 22                 | 30                          | 51                        |
| 2K2I           | i; i+7;                               | 11                                      | 10                 | 651                         | 660                       |
| 2NNU           | i; i+4; i+7; i+8;                     | 9                                       | 11                 | 1345                        | 1355                      |
| 2NOJ           | i; i+1; i+8;                          | 6                                       | 14                 | 71                          | 84                        |
| 2O8A           | i; i+4; i+11;                         | 11                                      | 18                 | 132                         | 149                       |
| 2OF5           | i; i+7;                               | 17                                      | 11                 | 117                         | 127                       |
| 2OT3           | i; i+11;                              | 21                                      | 18                 | 351                         | 368                       |
| 2PBI           | i; i+4; i+7;                          | 9                                       | 14                 | 67                          | 80                        |
| 2PJW           | i; i+4; i+7;                          | 7                                       | 16                 | 354                         | 369                       |
| 2PQN           | i; i+1; i+4; i+7; i+8;                | 12                                      | 16                 | 148                         | 163                       |
| 2PQR           | i; i+1; i+4; i+11;                    | 6                                       | 15                 | 126                         | 140                       |
| 2QIY           | i; i+1; i+8;                          | 6                                       | 16                 | 214                         | 229                       |
| 2QLV           | i; i+7;                               | 6                                       | 14                 | 516                         | 529                       |
| 2R17           | i; i+7;                               | 9                                       | 22                 | 524                         | 545                       |
| 2SIV           | i; i+7; i+13; i+18;                   | 6                                       | 35                 | 547                         | 581                       |
| 2V1D           | i; i+7; i+8;                          | 12                                      | 34                 | 474                         | 507                       |
| 2VE7           | i; 11; 15;                            | 12                                      | 20                 | 1124                        | 1143                      |
| 2VE7           | i; i+7;                               | 8                                       | 22                 | 177                         | 198                       |
| 2VE7           | i; i+16;                              | 9                                       | 21                 | 79                          | 99                        |
| 2VGO           | i; i+8;                               | 12                                      | 13                 | 805                         | 817                       |
| 2WAX           | i; i+4; i+7;                          | 8                                       | 12                 | 215                         | 226                       |
| 2WIN           | i; i+1; i+8;                          | 12                                      | 24                 | 60                          | 83                        |
| 2WME           | i; i+7;                               | 9                                       | 11                 | 267                         | 277                       |
| 2Z2T           | i; i+14; i+17; i+20;                  | 8                                       | 35                 | 1547                        | 1581                      |
| 2Z3R           | i; i+3; i+7;                          | 6                                       | 20                 | 36                          | 55                        |
| 2ZL1           | i; i+4; i+8;                          | 8                                       | 20                 | 42                          | 61                        |
| 3BEG           | i; i+7;                               | 8                                       | 13                 | 561                         | 573                       |
| 3BOW           | i; i+3; i+7;                          | 6                                       | 14                 | 99                          | 112                       |
| 3BRT           | i; i+18;                              | 15                                      | 60                 | 50                          | 109                       |
| 3BRV           | i; i+7; i+14; i+17;                   | 8                                       | 60                 | 50                          | 109                       |

TABLE S1

| A. PDB<br>CODE | Q. HELIX SEQUENCE                                            | R. RESOLUTION |
|----------------|--------------------------------------------------------------|---------------|
| 2D10           | WSKKNELFSN                                                   | 2.50          |
| 2DOI           | DAELQRLKNERHEEAELERL                                         | 3.10          |
| 2DSR           | AELVDALQFVCG                                                 | 2.10          |
| 2E9X           | LIPTIKFRHCSSLRNRRCTVAYLYDRLLRIRALRWEY                        | 2.30          |
| 2E9X           | AEMEWFNNYKRSLATYMRLSG                                        | 2.30          |
| 2E9X           | PEELAFAREFMANTESYLKNVALK                                     | 2.30          |
| 2E9X           | DLKVSIIHQMEMERIRYVLSYLRCRLMKIEKF                             | 2.30          |
| 2E9X           | ADEIRTLVKDMWDTRIAKLRVSADSFVRQ                                | 2.30          |
| 2E9X           | EMERGLFQTGQKGLNDFQCWEK                                       | 2.30          |
| 2EFC           | EAAFFFTNILSAESFISN                                           | 2.09          |
| 2EHB           | REELKEMVVALHES                                               | 2.10          |
| 2EHO           | LIPTIKFRHCSSLRNRRCTVAYLYDRLLRIRALRW                          | 3.00          |
| 2EHO           | RIRYVLSYLRCRL                                                | 3.00          |
| 2EQB           | NELRTKAEEDKLNKEVEDLTASLFDEANNMVADARKEKYAIEILNKRLTEQL         | 2.70          |
| 2ES4           | PEAAARAAQMQQDDEAWQTRYQAYAAERDRIAAQG                          | 1.85          |
| 2FK0           | YNAELLVLMENERTLDFHDSNVKN                                     | 2.95          |
| 2FO1           | ELHRQRSELARANYEKA                                            | 3.12          |
| 2G38           | DSMLAAARAWRSLDVEMTAVQRSFNRTLL                                | 2.20          |
| 2GMI           | RNFRLLLEELEKGEK                                              | 2.50          |
| 2GOX           | VSAHRKAQKAVNLV                                               | 2.20          |
| 2HQW           | KATFRAITSTLASSFK                                             | 1.90          |
| 2HUE           | KLPFQRLVREIAQDFK                                             | 1.70          |
| 2HV8           | RDELMEAIQKQEEINFRLQDYIDRIIVAIME                              | 1.86          |
| 2I2R           | FEDFVTALSILLRG                                               | 3.35          |
| 2IZV           | SHVLSKVCMYFTYKVRVY                                           | 2.55          |
| 2JFA           | AFQLRQLILRGLQ                                                | 2.55          |
| 2JRI           | PVELSSIAHQLEEERMRMAEG                                        | NOT APP       |
| 2K2I           | LHRALQAWVT                                                   | NOT APP       |
| 2NNU           | IDMNFQSDLLS                                                  | 1.59          |
| 2NOJ           | VATHRKAQRAVNL                                                | 2.70          |
| 2O8A           | PEEREKKRQFEMKRKLHY                                           | 2.61          |
| 2OF5           | DRQINQLAQRL                                                  | 3.20          |
| 2OT3           | EDGYFYFTNLCCAVAFIEK                                          | 2.10          |
| 2PBI           | NLEAQNLGNFIVKY                                               | 1.95          |
| 2PJW           | SLRQVLANAERSYNQL                                             | 3.01          |
| 2PQN           | LFQGFKSYLPIAELAI                                             | 2.15          |
| 2PQR           | LFEGFKATVSIIQQR                                              | 1.88          |
| 2QIY           | EAEFAAASVQRYELNM                                             | 1.69          |
| 2QLV           | LDVMGEIYIALKNL                                               | 2.60          |
| 2R17           | RIRFTLPPLVFAAYQLAFRYKE                                       | 2.80          |
| 2SIV           | GIVQQQQQLLDVVKRQQELLRLTVWGTKNLQTRVT                          | 2.20          |
| 2V1D           | ITAFLVKSKHRDLTALCKEYDELAETQGKLEEK                            | 3.10          |
| 2VE7           | NAERLKRLQKSADLYKDRLG                                         | 2.88          |
| 2VE7           | TWPHIVAALVWLIDCIKIHTAM                                       | 2.88          |
| 2VE7           | MEGFLPFSNLVTHLDSFLPIC                                        | 2.88          |
| 2VGO           | NLLTQAIRQQYYK                                                | 1.70          |
| 2WAX           | KAASFEEIDTYE                                                 | 2.30          |
| 2WIN           | FKKMSEAKYQLQKIYNEIDEALKS                                     | 3.90          |
| 2WME           | LDRAADIAVMA                                                  | 2.10          |
| 2Z2T           | DIVQQQNNLLRAIEAQQHLLQLTVWGIKQLQARIL                          | 2.10          |
| 2Z3R           | KVTAMKCFLELQVISLESG                                          | 2.00          |
| 2ZL1           | ARVTAASNIWAAYDRNGN                                           | 2.00          |
| 3BEG           | RDEDHIALIELL                                                 | 2.90          |
| 3BOW           | EERQFRKLFVQLAG                                               | 2.40          |
| 3BRT           | TLQRCLEENQELRDAIRQSNQILRERCEELLHFQASQREEKEFLMCKFQEARKLVERLGL | 2.25          |
| 3BRV           | TLQRCLEENQELRDAIRQSNQILRERCEELLHFQASQREEKEFLMCKFQEARKLVERLGL | 2.20          |



| A. PDB<br>CODE | B. INTERFACE<br>CHAINS | C. CHAIN | D. TITLE                                                                        |
|----------------|------------------------|----------|---------------------------------------------------------------------------------|
| 3C59           | A B                    | A        | CRYSTAL STRUCTURE OF THE LIGAND-BOUND GLUCAGON-LIKE PEPTIDE- 1 RECEPTOR EXTRACI |
| 3DCG           | A B                    | B        | CRYSTAL STRUCTURE OF THE HIV VIF BC-BOX IN COMPLEX WITH HUMAN ELONGINB AND ELON |
| 3EAB           | B H                    | B        | CRYSTAL STRUCTURE OF SPASTIN MIT IN COMPLEX WITH ESCRT III                      |
| 3EX7           | A B                    | A        | THE CRYSTAL STRUCTURE OF EJC IN ITS TRANSITION STATE                            |
| 3EZQ           | K L                    | K        | CRYSTAL STRUCTURE OF THE FAS/FADD DEATH DOMAIN COMPLEX                          |
| 3G9V           | C D                    | D        | CRYSTAL STRUCTURE OF A SOLUBLE DECOY RECEPTOR IL-22BP BOUND TO INTERLEUKIN-22   |
| 3GJX           | B A                    | A        | CRYSTAL STRUCTURE OF THE NUCLEAR EXPORT COMPLEX CRM1- SNURPORTIN1-RANGTP        |
| 3GJX           | B A                    | B        | CRYSTAL STRUCTURE OF THE NUCLEAR EXPORT COMPLEX CRM1- SNURPORTIN1-RANGTP        |
| 3H6P           | A C                    | C        | CRYSTAL STRUCTURE OF RV3019C-RV3020C FROM MYCOBACTERIUM TUBERCULOSIS            |

TABLE S1

Bullock, et. al

| A. PDB<br>CODE | E. FUNCTION                           | F. $\Delta\Delta G_{\text{AVG,HELIX}}$<br>(KCAL/MOL) | G. $\Delta\Delta G_{\text{SUM,HELIX}}$<br>(KCAL/MOL) | H. $\Delta\Delta G_{\text{SUM,CHAIN}}$<br>(KCAL/MOL) |
|----------------|---------------------------------------|------------------------------------------------------|------------------------------------------------------|------------------------------------------------------|
| 3C59           | SIGNALING PROTEIN/SIGNALING PROTEIN   | 2.2                                                  | 4.3                                                  | 8.6                                                  |
| 3DCG           | LIGASE/VIRAL PROTEIN                  | 2.0                                                  | 3.9                                                  | 7.9                                                  |
| 3EAB           | CELL CYCLE                            | 2.8                                                  | 8.3                                                  | 9.6                                                  |
| 3EX7           | HYDROLASE/RNA BINDING PROTEIN/RNA     | 2.4                                                  | 12.1                                                 | 14.7                                                 |
| 3EZQ           | APOPTOSIS                             | 2.6                                                  | 7.7                                                  | 9.2                                                  |
| 3G9V           | CYTOKINE/CYTOKINE RECEPTOR            | 2.2                                                  | 4.3                                                  | 8.6                                                  |
| 3GJX           | PROTEIN TRANSPORT                     | 2.7                                                  | 5.3                                                  | 13.1                                                 |
| 3GJX           | PROTEIN TRANSPORT                     | 2.1                                                  | 8.3                                                  | 14.9                                                 |
| 3H6P           | STRUCTURAL GENOMICS, UNKNOWN FUNCTION | 2.1                                                  | 6.4                                                  | 7.5                                                  |

TABLE S1

Bullock, et. al

| A. PDB<br>CODE | I. HELIX<br>CONTRIBUTION | J. # HOTSPOT<br>RESIDUES | K. HOTSPOT RESIDUES, RESIDUE #<br>$\Delta\Delta G_{(KCAL/MOL)}$ |
|----------------|--------------------------|--------------------------|-----------------------------------------------------------------|
| 3C59           | 50%                      | 2                        | L32, 1.7; W39, 2.6;                                             |
| 3DCG           | 49%                      | 2                        | H68, 2.6; M75, 1.3;                                             |
| 3EAB           | 86%                      | 3                        | R117, 1.5; H120, 2.1; F124, 4.7;                                |
| 3EX7           | 82%                      | 5                        | Y124, 2.1; D128, 1.7; S135, 2.4; L139, 1.9; H140, 4.0;          |
| 3EZQ           | 84%                      | 3                        | Y291, 2.2; I295, 4.5; T305, 1.0;                                |
| 3G9V           | 50%                      | 2                        | P50, 1.4; F57, 2.9;                                             |
| 3GJX           | 40%                      | 2                        | F561, 2.4; K568, 2.9;                                           |
| 3GJX           | 56%                      | 4                        | M1, 1.5; E2, 1.1; L4, 2.9; L8, 2.8;                             |
| 3H6P           | 85%                      | 3                        | Y21, 3.0; L25, 1.2; I32, 2.2;                                   |

**TABLE S1**

Bullock, et. al

| A. PDB<br>CODE | L. HOTSPOT RESIDUE<br>HELIX POSITIONS | M. HOTSPOT RESIDUE<br>END TO END LENGTH | N. HELIX<br>LENGTH | O. HELIX START<br>RESIDUE # | P. HELIX END<br>RESIDUE # |
|----------------|---------------------------------------|-----------------------------------------|--------------------|-----------------------------|---------------------------|
| 3C59           | i; i+7;                               | 19                                      | 22                 | 32                          | 53                        |
| 3DCG           | i; i+7;                               | 6                                       | 17                 | 67                          | 83                        |
| 3EAB           | i; i+3; i+7;                          | 9                                       | 28                 | 110                         | 137                       |
| 3EX7           | i; i+4; i+11; i+15; i+16;             | 7                                       | 27                 | 116                         | 142                       |
| 3EZQ           | i; i+4; i+14;                         | 9                                       | 32                 | 287                         | 318                       |
| 3G9V           | i; i+7;                               | 6                                       | 17                 | 50                          | 66                        |
| 3GJX           | i; i+7;                               | 11                                      | 14                 | 559                         | 572                       |
| 3GJX           | i; i+1; i+3; i+7;                     | 14                                      | 11                 | 0                           | 10                        |
| 3H6P           | i; i+4; i+11;                         | 14                                      | 19                 | 21                          | 39                        |

| A. PDB<br>CODE | Q. HELIX SEQUENCE               | R. RESOLUTION |
|----------------|---------------------------------|---------------|
| 3C59           | LWETVQKWREYRRQCQRSLTED          | 2.30          |
| 3DCG           | SHVLSKVCMYFTYKVRY               | 2.40          |
| 3EAB           | SMEAERVRFHKQAFEYISIALRIDEDE     | 2.50          |
| 3EX7           | PEGLRVFYLVQDLKCLVFLIGLHFK       | 2.30          |
| 3EZQ           | KKEAYDTLIKDLKCANLCTLAEKIQTIIKDI | 2.73          |
| 3G9V           | PYITNRTFMLAKEASLA               | 2.76          |
| 3GJX           | WKFLKTVVNKLFEF                  | 2.50          |
| 3GJX           | SMEELSQUALAS                    | 2.50          |
| 3H6P           | YAGTLQSLGADIASEQAVL             | 1.91          |

**Table S2.** Dataset of HIP interactions with hotspots on two helical faces

## Description of Entries:

- A. PDB code of predicted target.
- B. Chains in the complex featuring a helix at the interface.
- C. Candidate helix to be mimicked is part of the indicated chain.
- D. Title of PDB entry.
- E. Function of protein complex.
- F.  $\Delta\Delta G_{\text{avg}}/\text{helix}$  is derived from Rosetta computational alanine mutagenesis studies and indicates the average free energy penalty for mutating two or more key residues in the helix at the interface to alanine.
- G.  $\Delta\Delta G_{\text{sum}}/\text{helix}$  is derived from Rosetta computational alanine mutagenesis studies and indicates the average free energy penalty for mutating two or more key residues at the interface to alanine.
- H.  $\Delta\Delta G_{\text{sum}}/\text{chain}$  is derived from Rosetta computational alanine mutagenesis studies and indicates the sum free energy penalty for mutating two or more key residues in the helix at the interface to alanine.
- I. Helix contribution refers to the proportion of key contact residues positioned on the candidate helix as compared to the chain (see text for a detailed explanation).
- J. Number of hot spot residues in helix.
- K. Relative positioning of the hot spot residues on a helix.
- L. Hot spot residues derived from Rosetta computational alanine scanning mutagenesis.
- M. Number of residues separating end hot spot residues (see Methods for more details).
- N. Length of candidate helix to be mimicked.
- O. First residue of the candidate helix segment.
- P. Last residue of the candidate helix segment.
- Q. Sequence of candidate helix to be mimicked.
- R. Resolution of PDB structure (NOT APP indicates NMR structure).

| A. PDB CODE | B. INTERFACE CHAINS | C. CHAIN | D. TITLE                                                                                  |
|-------------|---------------------|----------|-------------------------------------------------------------------------------------------|
| 1DOA        | A B                 | A        | STRUCTURE OF THE RHO FAMILY GTP-BINDING PROTEIN CDC42 IN COMPLEX WITH THE MULTIFUNCTIONAL |
| 1FQV        | E F                 | E        | INSIGHTS INTO SCF UBIQUITIN LIGASES FROM THE STRUCTURE OF THE SKP1-SKP2 COMPLEX           |
| 1LQB        | B C                 | C        | CRYSTAL STRUCTURE OF A HYDROXYLATED HIF-1 ALPHA PEPTIDE BOUND TO THE PVHL/ELONG           |
| 1MDU        | A B                 | A        | CRYSTAL STRUCTURE OF THE CHICKEN ACTIN TRIMER COMPLEXED WITH HUMAN GELSOLIN SE            |
| 1MF8        | A B                 | A        | CRYSTAL STRUCTURE OF HUMAN CALCINEURIN COMPLEXED WITH CYCLOSPORIN A AND HUMA              |
| 1TY4        | A C                 | C        | CRYSTAL STRUCTURE OF A CED-9/EGL-1 COMPLEX                                                |
| 1U0S        | Y A                 | A        | CHEMOTAXIS KINASE CHEA P2 DOMAIN IN COMPLEX WITH RESPONSE REGULATOR CHEY FROM             |
| 1XIU        | A E                 | E        | CRYSTAL STRUCTURE OF THE AGONIST-BOUND LIGAND-BINDING DOMAIN OF BIOMPHALARIA C            |
| 1Z56        | A C                 | A        | CO-CRYSTAL STRUCTURE OF LIFIP-LIG4P                                                       |
| 2C9W        | A C                 | C        | CRYSTAL STRUCTURE OF SOCS-2 IN COMPLEX WITH ELONGIN-B AND ELONGIN-C AT 1.9A RESOLU        |
| 2EHB        | A D                 | D        | THE STRUCTURE OF THE C-TERMINAL DOMAIN OF THE PROTEIN KINASE ATOS2 BOUND TO THE           |
| 2I3S        | C D                 | D        | BUB3 COMPLEX WITH BUB1 GLEBS MOTIF                                                        |
| 2I3T        | C D                 | D        | BUB3 COMPLEX WITH MAD3 (BUBR1) GLEBS MOTIF                                                |
| 2KA6        | A B                 | B        | NMR STRUCTURE OF THE CBP-TAZ2/STAT1-TAD COMPLEX                                           |
| 2V1Y        | A B                 | B        | STRUCTURE OF A PHOSPHOINOSITIDE 3-KINASE ALPHA ADAPTOR- BINDING DOMAIN (ABD) IN A         |
| 3DAW        | A B                 | B        | STRUCTURE OF THE ACTIN-DEPOLYMERIZING FACTOR HOMOLOGY DOMAIN IN COMPLEX WITH              |
| 3EJB        | G H                 | G        | CRYSTAL STRUCTURE OF P450BIOI IN COMPLEX WITH TETRADECANOIC ACID LIGATED ACYL CA          |
| 3G9V        | A B                 | A        | CRYSTAL STRUCTURE OF A SOLUBLE DECOY RECEPTOR IL-22BP BOUND TO INTERLEUKIN-22             |
| 1AVO        | E F                 | E        | PROTEASOME ACTIVATOR REG(ALPHA)                                                           |
| 1BH8        | A B                 | B        | HTAFII18/HTAFII28 HETERODIMER CRYSTAL STRUCTURE                                           |
| 1BPL        | A B                 | B        | GLYCOSYLTRANSFERASE                                                                       |
| 1D8D        | A B                 | A        | CO-CRYSTAL STRUCTURE OF RAT PROTEIN FARNESYLTRANSFERASE COMPLEXED WITH A K-RAS            |
| 1DP5        | A B                 | B        | THE STRUCTURE OF PROTEINASE A COMPLEXED WITH A IA3 MUTANT INHIBITOR                       |
| 1DX5        | A M                 | A        | CRYSTAL STRUCTURE OF THE THROMBIN-THROMBOMODULIN COMPLEX                                  |
| 1E0F        | A D                 | A        | CRYSTAL STRUCTURE OF THE HUMAN ALPHA-THROMBIN-HAEMADIN COMPLEX: AN EXOSITE II-            |
| 1EER        | A C                 | A        | CRYSTAL STRUCTURE OF HUMAN ERYTHROPOIETIN COMPLEXED TO ITS RECEPTOR AT 1.9 ANG'S          |
| 1F51        | D H                 | D        | A TRANSIENT INTERACTION BETWEEN TWO PHOSPHORELAY PROTEINS TRAPPED IN A CRYSTAL            |
| 1F6F        | A B                 | A        | CRYSTAL STRUCTURE OF THE TERNARY COMPLEX BETWEEN OVINE PLACENTAL LACTOGEN AN              |
| 1FM6        | U V                 | V        | THE 2.1 ANGSTROM RESOLUTION CRYSTAL STRUCTURE OF THE HETERODIMER OF THE HUMAN I           |
| 1FQJ        | A B                 | A        | CRYSTAL STRUCTURE OF THE HETEROTRIMERIC COMPLEX OF THE RGS DOMAIN OF RGS9, THE C          |
| 1G5J        | A B                 | B        | COMPLEX OF BCL-XL WITH PEPTIDE FROM BAD                                                   |
| 1GX7        | A D                 | D        | BEST MODEL OF THE ELECTRON TRANSFER COMPLEX BETWEEN CYTOCHROME C3 AND [FE]-HYDROXY        |
| 1GZL        | A C                 | A        | CRYSTAL STRUCTURE OF C14LINKMID/IQN17: A CROSS-LINKED INHIBITOR OF HIV-1 ENTRY BOUN       |
| 1H2S        | A B                 | A        | MOLECULAR BASIS OF TRANSMEMBRANE SIGNALLING BY SENSORY RHODOPSIN II-TRANSDUCE             |
| 1H3O        | A B                 | B        | CRYSTAL STRUCTURE OF THE HUMAN TAF4-TAF12 (TAFII135-TAFII20) COMPLEX                      |
| 1HIA        | A B                 | B        | KALLIKREIN COMPLEXED WITH HIRUSTASIN                                                      |
| 1HL6        | A B                 | B        | A NOVEL MODE OF RBD-PROTEIN RECOGNITION IN THE Y14-MAGO COMPLEX                           |
| 1ID5        | L H                 | L        | CRYSTAL STRUCTURE OF BOVINE THROMBIN COMPLEX WITH PROTEASE INHIBITOR ECOTIN               |
| 1IHF        | A B                 | A        | INTEGRATION HOST FACTOR/DNA COMPLEX                                                       |
| 1JF1        | A B                 | B        | CRYSTAL STRUCTURE OF THE NC2-TBP-DNA TERNARY COMPLEX                                      |
| 1JM7        | A B                 | A        | SOLUTION STRUCTURE OF THE BRCA1/BARD1 RING-DOMAIN HETERODIMER                             |
| 1JYO        | C F                 | F        | STRUCTURE OF THE SALMONELLA VIRULENCE EFFECTOR SPTP IN COMPLEX WITH ITS SECRETIC          |
| 1LUJ        | A B                 | A        | CRYSTAL STRUCTURE OF THE BETA-CATENIN/ICAT COMPLEX                                        |
| 1M63        | A B                 | A        | CRYSTAL STRUCTURE OF CALCINEURIN-CYCLOPHILIN-CYCLOSPORIN SHOWS COMMON BUT DIS             |
| 1MF8        | A B                 | A        | CRYSTAL STRUCTURE OF HUMAN CALCINEURIN COMPLEXED WITH CYCLOSPORIN A AND HUMA              |
| 1N4Q        | E F                 | F        | PROTEIN GERANYLGERANYLTRANSFERASE TYPE-I COMPLEXED WITH A GGPP ANALOG AND A K             |
| 1NX0        | A C                 | C        | STRUCTURE OF CALPAIN DOMAIN 6 IN COMPLEX WITH CALPASTATIN DIC                             |
| 1OOO        | A B                 | A        | CRYSTAL STRUCTURE OF THE DROSOPHILA MAGO NASHI-Y14 COMPLEX                                |
| 1OQP        | A B                 | B        | STRUCTURE OF THE CA2+/C-TERMINAL DOMAIN OF CALTRACTIN IN COMPLEX WITH THE CDC31           |
| 1OQS        | A B                 | A        | CRYSTAL STRUCTURE OF RV4/RV7 COMPLEX                                                      |
| 1OR0        | A B                 | A        | CRYSTAL STRUCTURES OF GLUTARYL 7-AMINOCEPHALOSPORANIC ACID ACYLASE: INSIGHT INT           |
| 1OR0        | C D                 | C        | CRYSTAL STRUCTURES OF GLUTARYL 7-AMINOCEPHALOSPORANIC ACID ACYLASE: INSIGHT INT           |
| 1P27        | A B                 | A        | CRYSTAL STRUCTURE OF THE HUMAN Y14/MAGOH COMPLEX                                          |
| 1PGR        | E F                 | E        | 2:2 COMPLEX OF G-CSF WITH ITS RECEPTOR                                                    |
| 1PZL        | A B                 | B        | CRYSTAL STRUCTURE OF HNF4A LBD IN COMPLEX WITH THE LIGAND AND THE COACTIVATOR S           |
| 1QZ7        | A B                 | B        | BETA-CATENIN BINDING DOMAIN OF AXIN IN COMPLEX WITH BETA- CATENIN                         |

TABLE S2

Bullock, et. al

| A. PDB<br>CODE | E. FUNCTION                              | F. $\Delta\Delta G_{AVG,HELIx}$<br>(KCAL/MOL) | G. $\Delta\Delta G_{SUM,HELIx}$<br>(KCAL/MOL) | H. $\Delta\Delta G_{SUM,CHAIN}$<br>(KCAL/MOL) | I. HELIX<br>CONTRIBUTION |
|----------------|------------------------------------------|-----------------------------------------------|-----------------------------------------------|-----------------------------------------------|--------------------------|
| 1DOA           | CELL CYCLE                               | 2.0                                           | 6.0                                           | 8.4                                           | 71%                      |
| 1FQV           | LIGASE                                   | 3.3                                           | 6.6                                           | 12.5                                          | 53%                      |
| 1LQB           | GENE REGULATION                          | 2.5                                           | 7.6                                           | 10.6                                          | 72%                      |
| 1MDU           | STRUCTURAL PROTEIN                       | 2.2                                           | 6.5                                           | 11.0                                          | 59%                      |
| 1MF8           | HYDROLASE, LIGASE                        | 2.9                                           | 8.6                                           | 33.6                                          | 26%                      |
| 1TY4           | APOPTOSIS                                | 2.0                                           | 6.0                                           | 13.8                                          | 43%                      |
| 1U0S           | SIGNALING PROTEIN                        | 2.5                                           | 7.4                                           | 7.4                                           | 100%                     |
| 1XIU           | TRANSCRIPTION/TRANSFERASE                | 2.2                                           | 8.8                                           | 8.8                                           | 100%                     |
| 1Z56           | LIGASE                                   | 4.3                                           | 12.9                                          | 12.9                                          | 100%                     |
| 2C9W           | TRANSCRIPTION REGULATION                 | 2.1                                           | 6.3                                           | 9.1                                           | 69%                      |
| 2EHB           | SIGNALING PROTEIN/TRANSFERASE            | 3.0                                           | 8.9                                           | 17.9                                          | 50%                      |
| 2I3S           | CELL CYCLE                               | 2.8                                           | 8.4                                           | 15.4                                          | 55%                      |
| 2I3T           | CELL CYCLE                               | 2.8                                           | 5.5                                           | 17.7                                          | 31%                      |
| 2KA6           | TRANSCRIPTION REGULATOR                  | 2.6                                           | 10.5                                          | 19.6                                          | 54%                      |
| 2V1Y           | TRANSFERASE                              | 2.7                                           | 5.3                                           | 7.8                                           | 68%                      |
| 3DAW           | STRUCTURAL PROTEIN/STRUCTURAL PROTEIN RE | 2.4                                           | 7.3                                           | 8.3                                           | 88%                      |
| 3EJB           | OXIDOREDUCTASE/LIPID TRANSPORT           | 2.3                                           | 9.3                                           | 13.5                                          | 69%                      |
| 3G9V           | CYTOKINE/CYTOKINE RECEPTOR               | 2.7                                           | 5.4                                           | 12.8                                          | 42%                      |
| 1AVO           | PROTEASOME ACTIVATOR                     | 2.8                                           | 19.9                                          | 19.9                                          | 100%                     |
| 1BH8           | TRANSCRIPTION REGULATION COMPLEX         | 2.0                                           | 9.8                                           | 16.0                                          | 61%                      |
| 1BPL           | GLYCOSYLTRANSFERASE                      | 2.9                                           | 17.1                                          | 48.5                                          | 35%                      |
| 1D8D           | TRANSFERASE                              | 2.1                                           | 10.7                                          | 49.1                                          | 22%                      |
| 1DP5           | HYDROLASE/HYDROLASE INHIBITOR            | 2.0                                           | 16.0                                          | 22.0                                          | 73%                      |
| 1DX5           | SERINE PROTEINASE                        | 2.2                                           | 8.7                                           | 10.7                                          | 81%                      |
| 1E0F           | COAGULATION/CRYSTAL STRUCTURE/HEPARIN-B  | 2.0                                           | 3.9                                           | 6.1                                           | 64%                      |
| 1EER           | COMPLEX (CYTOKINE/RECEPTOR)              | 2.1                                           | 4.1                                           | 4.1                                           | 100%                     |
| 1F51           | TRANSFERASE                              | 2.2                                           | 8.9                                           | 8.9                                           | 100%                     |
| 1F6F           | HORMONE/GROWTH FACTOR/HORMONE RECEPTOR   | 2.3                                           | 9.0                                           | 10.7                                          | 84%                      |
| 1FM6           | TRANSCRIPTION                            | 2.1                                           | 6.4                                           | 6.4                                           | 100%                     |
| 1FQJ           | SIGNALING PROTEIN                        | 2.0                                           | 5.9                                           | 5.9                                           | 100%                     |
| 1G5J           | APOPTOSIS                                | 2.3                                           | 4.6                                           | 4.6                                           | 100%                     |
| 1GX7           | OXIDOREDUCTASE                           | 2.2                                           | 13.3                                          | 51.0                                          | 26%                      |
| 1GZL           | GLYCOPROTEIN                             | 2.6                                           | 5.1                                           | 5.1                                           | 100%                     |
| 1H2S           | MEMBRANE PROTEIN                         | 2.0                                           | 4.0                                           | 9.0                                           | 44%                      |
| 1H3O           | TRANSCRIPTION/TBP-ASSOCIATED FACTORS     | 2.0                                           | 5.9                                           | 14.3                                          | 41%                      |
| 1HIA           | COMPLEX (PROTEASE/INHIBITOR)             | 2.9                                           | 5.8                                           | 27.9                                          | 21%                      |
| 1HL6           | SIGNAL PROTEIN                           | 3.0                                           | 11.9                                          | 26.6                                          | 45%                      |
| 1ID5           | HYDROLASE                                | 2.7                                           | 13.5                                          | 13.5                                          | 100%                     |
| 1IHF           | TRANSCRIPTION/DNA                        | 2.0                                           | 18.3                                          | 38.1                                          | 48%                      |
| 1JF1           | TRANSCRIPTION/DNA                        | 2.3                                           | 9.0                                           | 16.5                                          | 55%                      |
| 1JM7           | ANTITUMOR                                | 3.0                                           | 12.0                                          | 15.8                                          | 76%                      |
| 1JYO           | CHAPERONE                                | 2.3                                           | 9.3                                           | 26.1                                          | 36%                      |
| 1LUJ           | STRUCTURAL PROTEIN                       | 2.0                                           | 7.9                                           | 10.0                                          | 79%                      |
| 1M63           | HYDROLASE/ISOMERASE                      | 2.0                                           | 9.9                                           | 22.4                                          | 44%                      |
| 1MF8           | HYDROLASE, LIGASE                        | 2.1                                           | 10.4                                          | 33.6                                          | 31%                      |
| 1N4Q           | TRANSFERASE                              | 2.0                                           | 7.9                                           | 46.8                                          | 17%                      |
| 1NX0           | HYDROLASE                                | 2.2                                           | 6.7                                           | 9.8                                           | 68%                      |
| 1O00           | SIGNALING PROTEIN                        | 2.2                                           | 13.0                                          | 20.8                                          | 63%                      |
| 1OQP           | PROTEIN BINDING                          | 2.5                                           | 12.7                                          | 12.7                                          | 100%                     |
| 1OQS           | HYDROLASE                                | 3.0                                           | 5.9                                           | 17.4                                          | 34%                      |
| 1OR0           | HYDROLASE                                | 4.0                                           | 7.9                                           | 58.0                                          | 14%                      |
| 1OR0           | HYDROLASE                                | 3.2                                           | 9.7                                           | 63.2                                          | 15%                      |
| 1P27           | RNA BINDING PROTEIN                      | 2.3                                           | 7.0                                           | 15.0                                          | 47%                      |
| 1PGR           | CYTOKINE                                 | 2.2                                           | 6.5                                           | 7.9                                           | 82%                      |
| 1PZL           | TRANSCRIPTION                            | 2.2                                           | 8.7                                           | 8.7                                           | 100%                     |
| 1QZ7           | CELL ADHESION                            | 2.0                                           | 10.1                                          | 10.1                                          | 100%                     |



TABLE S2

| A. PDB<br>CODE | J. # HOTSPOT<br>RESIDUES | K. HOTSPOT RESIDUES, RESIDUE #<br>$\Delta\Delta G_{(KCAL/MOL)}$                           |
|----------------|--------------------------|-------------------------------------------------------------------------------------------|
| 1DOA           | 3                        | R66, 2.8; L67, 2.2; R68, 1.0;                                                             |
| 1FQV           | 2                        | K131, 2.8; S133, 3.8;                                                                     |
| 1LQB           | 3                        | L158, 3.5; K159, 1.2; R161, 2.9;                                                          |
| 1MDU           | 3                        | I79, 2.3; F80, 3.2; V82, 1.0;                                                             |
| 1MF8           | 3                        | F350, 4.8; W352, 1.4; L354, 2.4;                                                          |
| 1TY4           | 3                        | D63, 2.5; F65, 2.5; D66, 1.0;                                                             |
| 1U0S           | 3                        | R195, 2.5; Y197, 2.9; L198, 2.0;                                                          |
| 1XIU           | 4                        | L690, 1.8; H691, 2.2; L693, 1.9; L694, 2.9;                                               |
| 1Z56           | 3                        | R209, 1.4; M211, 1.3; M212, 10.2;                                                         |
| 2C9W           | 3                        | L101, 2.2; L103, 1.0; L104, 3.1;                                                          |
| 2EHB           | 3                        | F313, 5.6; M315, 1.3; I316, 2.0;                                                          |
| 2I3S           | 3                        | E337, 3.5; E338, 1.9; L340, 3.0;                                                          |
| 2I3T           | 2                        | E383, 2.3; L385, 3.2;                                                                     |
| 2KA6           | 4                        | E730, 1.8; F731, 4.5; E733, 3.0; V734, 1.2;                                               |
| 2V1Y           | 2                        | F494, 4.3; E496, 1.0;                                                                     |
| 3DAW           | 3                        | R267, 1.2; R269, 4.7; M270, 1.4;                                                          |
| 3EJB           | 4                        | L57, 3.4; D58, 1.9; V60, 1.3; E61, 2.7;                                                   |
| 3G9V           | 2                        | W123, 1.3; E125, 4.1;                                                                     |
| 1AVO           | 7                        | L29, 1.3; Y32, 4.0; F33, 2.7; K36, 6.9; I37, 1.6; L40, 1.2; L44, 2.2;                     |
| 1BH8           | 5                        | M154, 1.1; K159, 1.0; F161, 4.5; V162, 1.7; V166, 1.5;                                    |
| 1BPL           | 6                        | E211, 1.0; I212, 1.3; W215, 3.5; W218, 5.1; Y219, 4.4; E222, 1.8;                         |
| 1D8D           | 5                        | N234, 3.2; S235, 2.9; W237, 1.9; N238, 1.6; H241, 1.1;                                    |
| 1DP5           | 8                        | V8, 2.9; I11, 1.5; F12, 2.8; L19, 1.6; D22, 2.0; V25, 1.0; V26, 1.9; F30, 2.3;            |
| 1DX5           | 4                        | E14, 2.0; E14, 2.1; L14, 1.0; Y14, 3.6;                                                   |
| 1E0F           | 2                        | E14, 1.0; Y14, 2.9;                                                                       |
| 1EER           | 2                        | R103, 2.9; L108, 1.2;                                                                     |
| 1F51           | 4                        | H630, 3.4; N634, 2.6; L638, 1.4; K640, 1.5;                                               |
| 1F6F           | 4                        | H177, 1.7; R178, 4.6; S181, 1.5; K182, 1.2;                                               |
| 1FM6           | 3                        | I632, 3.2; L636, 1.2; L637, 2.0;                                                          |
| 1FQJ           | 3                        | E203, 1.1; K206, 3.5; H209, 1.3;                                                          |
| 1G5J           | 2                        | R313, 1.0; F319, 3.6;                                                                     |
| 1GX7           | 6                        | K40, 1.3; Y42, 2.7; M43, 1.4; R46, 1.9; I47, 1.0; Y51, 5.0;                               |
| 1GZL           | 2                        | L29, 1.0; W35, 4.1;                                                                       |
| 1H2S           | 2                        | T191, 1.2; L196, 2.8;                                                                     |
| 1H3O           | 3                        | F91, 2.3; I92, 1.8; V96, 1.8;                                                             |
| 1HIA           | 2                        | W237, 2.8; I242, 3.0;                                                                     |
| 1HL6           | 4                        | Y125, 2.7; S136, 1.7; L140, 2.6; H141, 4.9;                                               |
| 1ID5           | 5                        | E14, 2.4; E14, 2.6; F14, 1.7; L14, 3.0; Y14, 3.8;                                         |
| 1IHF           | 9                        | D22, 1.4; E25, 1.4; L26, 1.4; F30, 2.9; F31, 4.0; E33, 1.0; R35, 2.7; L38, 1.8; E39, 1.7; |
| 1JFI           | 4                        | L138, 2.0; F146, 3.4; I147, 2.6; H148, 1.0;                                               |
| 1JM7           | 4                        | Q81, 1.1; E85, 2.2; L86, 7.7; D96, 1.0;                                                   |
| 1JYO           | 4                        | F83, 4.5; H85, 1.1; E89, 1.3; K90, 2.4;                                                   |
| 1LUJ           | 4                        | T653, 1.3; Y654, 1.8; F660, 2.7; R661, 2.1;                                               |
| 1M63           | 5                        | F350, 4.8; W352, 1.5; L354, 1.1; K360, 1.1; V361, 1.4;                                    |
| 1MF8           | 5                        | V361, 1.6; M364, 3.7; L365, 1.8; V368, 1.8; L369, 1.5;                                    |
| 1N4Q           | 4                        | K243, 1.7; R250, 2.1; W251, 2.2; I253, 1.9;                                               |
| 1NX0           | 3                        | I603, 2.4; L606, 2.9; D609, 1.4;                                                          |
| 1OOO           | 6                        | Y125, 1.9; D129, 1.8; L133, 1.2; S136, 1.7; L140, 2.5; H141, 3.9;                         |
| 1OQP           | 5                        | E245, 1.4; K247, 1.0; W248, 5.7; L251, 2.4; L252, 2.2;                                    |
| 1OQS           | 2                        | F3, 4.4; I9, 1.5;                                                                         |
| 1OR0           | 2                        | F100, 3.8; F107, 4.1;                                                                     |
| 1OR0           | 3                        | E74, 1.8; V78, 1.0; W79, 6.9;                                                             |
| 1P27           | 3                        | Y124, 2.6; S135, 2.2; H140, 2.2;                                                          |
| 1PGR           | 3                        | K17, 1.3; E20, 3.4; R23, 1.8;                                                             |
| 1PZL           | 4                        | L10, 2.3; H11, 1.1; L14, 3.5; Q15, 1.8;                                                   |
| 1QZ7           | 5                        | E470, 1.0; L473, 2.9; D474, 2.3; H476, 2.9; V480, 1.0;                                    |

TABLE S2

Bullock, et. al

| A. PDB<br>CODE | L. HOTSPOT RESIDUE<br>HELIX POSITIONS          | M. HOTSPOT RESIDUE<br>END TO END LENGTH | N. HELIX<br>LENGTH | O. HELIX START<br>RESIDUE # | P. HELIX END<br>RESIDUE # |
|----------------|------------------------------------------------|-----------------------------------------|--------------------|-----------------------------|---------------------------|
| 1DOA           | i; i+1; i+2;                                   | 5                                       | 5                  | 65                          | 69                        |
| 1FQV           | i; i+2;                                        | 5                                       | 9                  | 126                         | 134                       |
| 1LQB           | i; i+1; i+3;                                   | 5                                       | 11                 | 158                         | 168                       |
| 1MDU           | i; i+1; i+3;                                   | 5                                       | 18                 | 71                          | 88                        |
| 1MF8           | i; i+2; i+4;                                   | 5                                       | 10                 | 349                         | 358                       |
| 1TY4           | i; i+2; i+3;                                   | 4                                       | 6                  | 63                          | 68                        |
| 1U0S           | i; i+2; i+3;                                   | 5                                       | 15                 | 192                         | 206                       |
| 1XIU           | i; i+1; i+3; i+4;                              | 5                                       | 10                 | 688                         | 697                       |
| 1Z56           | i; i+2; i+3;                                   | 4                                       | 6                  | 209                         | 214                       |
| 2C9W           | i; i+2; i+3;                                   | 5                                       | 11                 | 100                         | 110                       |
| 2EHB           | i; i+2; i+3;                                   | 5                                       | 6                  | 312                         | 317                       |
| 2I3S           | i; i+1; i+3;                                   | 5                                       | 9                  | 336                         | 344                       |
| 2I3T           | i; i+2;                                        | 4                                       | 9                  | 381                         | 389                       |
| 2KA6           | i; i+1; i+3; i+4;                              | 4                                       | 12                 | 728                         | 739                       |
| 2V1Y           | i; i+2;                                        | 5                                       | 25                 | 481                         | 505                       |
| 3DAW           | i; i+2; i+3;                                   | 5                                       | 10                 | 266                         | 275                       |
| 3EJB           | i; i+1; i+3; i+4;                              | 3                                       | 14                 | 57                          | 70                        |
| 3G9V           | i; i+2;                                        | 4                                       | 5                  | 122                         | 126                       |
| 1AVO           | i; i+3; i+4; i+7; i+8; i+11; i+15;             | 16                                      | 38                 | 8                           | 45                        |
| 1BH8           | i; i+5; i+7; i+8; i+12;                        | 11                                      | 29                 | 148                         | 176                       |
| 1BPL           | i; i+1; i+4; i+7; i+8; i+11;                   | 12                                      | 18                 | 206                         | 223                       |
| 1D8D           | i; i+1; i+3; i+4; i+7;                         | 6                                       | 13                 | 234                         | 246                       |
| 1DP5           | i; i+3; i+4; i+11; i+14; i+17; i+18; i+22 ;    | 23                                      | 29                 | 3                           | 31                        |
| 1DX5           | i; i+2 ; i+3 ; i+7;                            | 7                                       | 9                  | 14                          | 14                        |
| 1E0F           | i; i+5;                                        | 12                                      | 11                 | 14A                         | 14J                       |
| 1EER           | i; i+5;                                        | 7                                       | 25                 | 89                          | 113                       |
| 1F51           | i; i+4; i+8; i+10;                             | 6                                       | 23                 | 620                         | 642                       |
| 1F6F           | i; i+1; i+4; i+5;                              | 14                                      | 34                 | 162                         | 195                       |
| 1FM6           | i; i+4; i+5;                                   | 11                                      | 9                  | 631                         | 639                       |
| 1FQJ           | i; i+3; i+6;                                   | 8                                       | 10                 | 201                         | 210                       |
| 1G5J           | i; i+6;                                        | 9                                       | 15                 | 306                         | 320                       |
| 1GX7           | i; i+2; i+3; i+6; i+7; i+11;                   | 12                                      | 18                 | 39                          | 56                        |
| 1GZL           | i; i+6;                                        | 8                                       | 43                 | 2                           | 44                        |
| 1H2S           | i; i+5;                                        | 13                                      | 34                 | 190                         | 223                       |
| 1H3O           | i; i+1; i+5;                                   | 7                                       | 22                 | 85                          | 106                       |
| 1HIA           | i; i+5;                                        | 8                                       | 11                 | 235                         | 245                       |
| 1HL6           | i; i+11; i+15; i+16;                           | 15                                      | 27                 | 117                         | 143                       |
| 1ID5           | i; i+2 ; i+3 ; i+4 ; i+7;                      | 9                                       | 9                  | 14                          | 14                        |
| 1IHF           | i; i+3; i+4; i+8; i+9; i+11; i+13; i+16; i+17; | 8                                       | 21                 | 20                          | 40                        |
| 1JF1           | i; i+8; i+9; i+10;                             | 9                                       | 29                 | 133                         | 161                       |
| 1JM7           | i; i+4; i+5; i+15;                             | 8                                       | 19                 | 80                          | 98                        |
| 1JYO           | i; i+2; i+6; i+7;                              | 8                                       | 15                 | 77                          | 91                        |
| 1LUJ           | i; i+1; i+7; i+8;                              | 9                                       | 14                 | 649                         | 662                       |
| 1M63           | i; i+2; i+4; i+10; i+11;                       | 9                                       | 15                 | 349                         | 363                       |
| 1MF8           | i; i+3; i+4; i+7; i+8;                         | 14                                      | 12                 | 359                         | 370                       |
| 1N4Q           | i; i+7; i+8; i+10;                             | 8                                       | 13                 | 242                         | 254                       |
| 1NX0           | i; i+3; i+6;                                   | 12                                      | 9                  | 602                         | 610                       |
| 1OO0           | i; i+4; i+8; i+11; i+15; i+16;                 | 14                                      | 26                 | 117                         | 142                       |
| 1OQP           | i; i+2; i+3; i+6; i+7;                         | 16                                      | 14                 | 240                         | 253                       |
| 1OQS           | i; i+6;                                        | 12                                      | 13                 | 2                           | 14                        |
| 1OR0           | i; i+7;                                        | 13                                      | 21                 | 98                          | 118                       |
| 1OR0           | i; i+4; i+5;                                   | 11                                      | 10                 | 74                          | 83                        |
| 1P27           | i; i+11; i+16;                                 | 9                                       | 26                 | 116                         | 141                       |
| 1PGR           | i; i+3; i+6;                                   | 19                                      | 29                 | 12                          | 40                        |
| 1PZL           | i; i+1; i+4; i+5;                              | 15                                      | 11                 | 8                           | 18                        |
| 1QZ7           | i; i+3; i+4; i+6; i+10;                        | 12                                      | 12                 | 470                         | 481                       |

TABLE S2

Bullock, et. al

| A. PDB<br>CODE | Q. HELIX SEQUENCE                            | R. RESOLUTION |
|----------------|----------------------------------------------|---------------|
| 1DOA           | DRLRP                                        | 2.60          |
| 1FQV           | LPELLKVSG                                    | 2.80          |
| 1LQB           | LKERCLQVVRS                                  | 2.00          |
| 1MDU           | QDESGAAAIFTVLDDYL                            | 2.20          |
| 1MF8           | VFTWSLPFVG                                   | 3.10          |
| 1TY4           | DDFDAQ                                       | 2.20          |
| 1U0S           | KSARIYLVFHKLEEL                              | 1.90          |
| 1XIU           | KILHRLQEG                                    | 2.50          |
| 1Z56           | RAMMVT                                       | 3.92          |
| 2C9W           | ALELLMAANFL                                  | 1.90          |
| 2EHB           | AFEMIT                                       | 2.10          |
| 2I3S           | TEEILAMIK                                    | 1.90          |
| 2I3T           | LEEVLAI SR                                   | 2.80          |
| 2KA6           | PEEFDEVS RIVG                                | NOT APP       |
| 2V1Y           | RTAIEAFNETIKIFEEQCQTQERY S                   | 2.40          |
| 3DAW           | IRERMLYSSC                                   | 2.55          |
| 3EJB           | LDTVELVMALEEEF                               | 2.00          |
| 3G9V           | PWWET                                        | 2.76          |
| 1AVO           | PEAQAKVDVFREDLCTKTENLLGSYFPKKISELDAFLK       | 2.80          |
| 1BH8           | QNVVIAMSGISKVVFVGEVVEEALDVCEKW               | 3.00          |
| 1BPL           | PDVAAEIKRWGTWYANEL                           | 2.20          |
| 1D8D           | NSVWNQRHFVISN                                | 2.00          |
| 1DP5           | TDQQKVSEIFQSSKEKLQGDAAKVVSDAFM               | 2.20          |
| 1DX5           | ERELLESYI                                    | 2.30          |
| 1E0F           | KTERELLESYI                                  | 3.10          |
| 1EER           | EPLQLHVDKAVSGLRSLTLLRALG                     | 1.90          |
| 1F51           | ELIHLLGHSRHDWMNKLQLIKGN                      | 3.00          |
| 1F6F           | ENVRRVAFYRLFHCLHRDSSKIYTYLRILKCR LT          | 2.30          |
| 1FM6           | KILHRLQE                                     | 2.10          |
| 1FQJ           | RSERKKWIHC                                   | 2.02          |
| 1G5J           | QRYGRELRRMSDEFV                              | NOT APP       |
| 1GX7           | IKDYMLDRINGVYGADAK                           | NOT APP       |
| 1GZL           | MKQIEDKIEEIESKQKKIENEIARIKLLQLTVWG I KQLQARI | 1.80          |
| 1H2S           | PTVDVALIVYLDLVTKVGFIALDAAATLRAEH             | 1.93          |
| 1H3O           | LQIADDFIESVVTAAACQLARHR                      | 2.30          |
| 1HIA           | LDWIDDITEN                                   | 2.40          |
| 1HL6           | PEGLRCFY YLVQDLKCLVFSLIGLHF                  | 2.50          |
| 1ID5           | EKELFESYI                                    | 2.50          |
| 1IHF           | KRDAKELVELFFEEIRRALEN                        | 2.20          |
| 1JF1           | NDARELVVNCCTEFIHLLISSEANEICNKS               | 2.62          |
| 1JM7           | SQLVEELKIICAFQLDTG                           | NOT APP       |
| 1JYO           | QKILQTFLHALTEKY                              | 1.90          |
| 1LUJ           | EGVATYAAAVLFRM                               | 2.50          |
| 1M63           | VFTWSLPFVGEKVTE                              | 2.80          |
| 1MF8           | EKVTEMLVNVLN                                 | 3.10          |
| 1N4Q           | EKELNRIKRWCIM                                | 2.40          |
| 1NX0           | AIDALSSDF                                    | 2.30          |
| 1O00           | PEGLRCFY YLVQDLKCLVFSLIGLHF                  | 1.85          |
| 1OQP           | KRELIESKWHRLLF                               | NOT APP       |
| 1OQS           | LFQFGEMILQKTG                                | 1.90          |
| 1OR0           | PDFRANLDAFAAGINAYAQQN                        | 2.00          |
| 1OR0           | EQTTVWLLTN                                   | 2.00          |
| 1P27           | PEGLRVFY YLVQDLKCLVFSLIGLHF                  | 2.00          |
| 1PGR           | QSFLKCLEQVRKIQQDGAALQEKL CATY                | 3.50          |
| 1PZL           | KILHRLQEGS                                   | 2.10          |
| 1QZ7           | ESILDEHVQRVM                                 | 2.20          |

| A. PDB CODE | B. INTERFACE CHAINS | C. CHAIN | D. TITLE                                                                            |
|-------------|---------------------|----------|-------------------------------------------------------------------------------------|
| 1R8U        | A B                 | A        | NMR STRUCTURE OF CBP TAZ1/CITED2 COMPLEX                                            |
| 1RF8        | A B                 | B        | SOLUTION STRUCTURE OF THE YEAST TRANSLATION INITIATION FACTOR EIF4E IN COMPLEX WITH |
| 1RIW        | B C                 | C        | THROMBIN IN COMPLEX WITH NATURAL PRODUCT INHIBITOR OSCILLARIN                       |
| 1RK8        | A B                 | B        | STRUCTURE OF THE CYTOSOLIC PROTEIN PYM BOUND TO THE MAGO- Y14 CORE OF THE EXON J    |
| 1RM1        | B C                 | B        | STRUCTURE OF A YEAST TFIIA/TBP/TATA-BOX DNA COMPLEX                                 |
| 1RM1        | B C                 | B        | STRUCTURE OF A YEAST TFIIA/TBP/TATA-BOX DNA COMPLEX                                 |
| 1RP3        | A B                 | B        | COCRYSTAL STRUCTURE OF THE FLAGELLAR SIGMA/ANTI-SIGMA COMPLEX, SIGMA-28/FLGM        |
| 1SA0        | C D                 | C        | TUBULIN-COLCHICINE: STATHMIN-LIKE DOMAIN COMPLEX                                    |
| 1SB0        | A B                 | B        | SOLUTION STRUCTURE OF THE KIX DOMAIN OF CBP BOUND TO THE TRANSACTIVATION DOMAIN     |
| 1SYQ        | A B                 | B        | HUMAN VINCULIN HEAD DOMAIN VH1, RESIDUES 1-258, IN COMPLEX WITH HUMANTALIN'S VINC   |
| 1TCO        | A B                 | A        | TERNARY COMPLEX OF A CALCINEURIN A FRAGMENT, CALCINEURIN B, FKBP12 AND THE IMMUNO   |
| 1TN6        | A B                 | A        | PROTEIN FARNESYLTRANSFERASE COMPLEXED WITH A RAP2A PEPTIDE SUBSTRATE AND A FPP A    |
| 1TQY        | C D                 | C        | THE ACTINORHODIN KETOSYNTHASE/CHAIN LENGTH FACTOR                                   |
| 1TQY        | E F                 | E        | THE ACTINORHODIN KETOSYNTHASE/CHAIN LENGTH FACTOR                                   |
| 1TUE        | H J                 | J        | THE X-RAY STRUCTURE OF THE PAPILLOMAVIRUS HELICASE IN COMPLEX WITH ITS MOLECULAR    |
| 1UKL        | A C                 | C        | CRYSTAL STRUCTURE OF IMPORTIN-BETA AND SREBP-2 COMPLEX                              |
| 1VCB        | K L                 | L        | THE VHL-ELONGINC-ELONGINB STRUCTURE                                                 |
| 1VYT        | A E                 | E        | BETA3 SUBUNIT COMPLEXED WITH AID                                                    |
| 1WA8        | A B                 | B        | SOLUTION STRUCTURE OF THE CFP-10.ESAT-6 COMPLEX. MAJOR VIRULENCE DETERMINANTS OF    |
| 1XB2        | A B                 | B        | CRYSTAL STRUCTURE OF BOS TAURUS MITOCHONDRIAL ELONGATION FACTOR TU/TS COMPLEX       |
| 1XLS        | E M                 | M        | CRYSTAL STRUCTURE OF THE MOUSE CAR/RXR LBD HETERODIMER BOUND TO TCPOBOP AND 9C      |
| 1Y74        | A D                 | A        | SOLUTION STRUCTURE OF MLIN-2/MLIN-7 L27 DOMAIN COMPLEX                              |
| 1YFN        | D H                 | H        | VERSATILE MODES OF PEPTIDE RECOGNITION BY THE AAA+ ADAPTOR PROTEIN SSPB- THE CRYST  |
| 1YOV        | A B                 | A        | INSIGHTS INTO THE UBIQUITIN TRANSFER CASCADE FROM THE REFINED STRUCTURE OF THE AC   |
| 1Z8U        | C D                 | C        | CRYSTAL STRUCTURE OF OXIDIZED ALPHA HEMOGLOBIN BOUND TO AHSP                        |
| 1ZDT        | A P                 | P        | THE CRYSTAL STRUCTURE OF HUMAN STEROIDOGENIC FACTOR-1                               |
| 1ZUN        | A B                 | A        | CRYSTAL STRUCTURE OF A GTP-REGULATED ATP SULFURYLASE HETERODIMER FROM PSEUDOM       |
| 1ZW3        | A B                 | B        | VINCULIN HEAD (0-258) IN COMPLEX WITH THE TALIN ROD RESIDUES 1630-1652              |
| 2A6Q        | A E                 | A        | CRYSTAL STRUCTURE OF YEFM-YOEB COMPLEX                                              |
| 2A6Q        | C F                 | F        | CRYSTAL STRUCTURE OF YEFM-YOEB COMPLEX                                              |
| 2AST        | B C                 | C        | CRYSTAL STRUCTURE OF SKP1-SKP2-CKS1 IN COMPLEX WITH A P27 PEPTIDE                   |
| 2B87        | A B                 | A        | STRUCTURAL BASIS FOR MOLECULAR RECOGNITION IN AN AFFIBODY:AFFIBODY COMPLEX          |
| 2B9S        | A B                 | B        | CRYSTAL STRUCTURE OF HETERODIMERIC L. DONOVANI TOPOISOMERASE I-VANADATE-DNA CO      |
| 2BZW        | A B                 | B        | THE CRYSTAL STRUCTURE OF BCL-XL IN COMPLEX WITH FULL-LENGTH BAD                     |
| 2C2V        | B C                 | C        | CRYSTAL STRUCTURE OF THE CHIP-UBC13-UEV1A COMPLEX                                   |
| 2D1P        | G I                 | I        | CRYSTAL STRUCTURE OF HETEROHEXAMERIC TUSBCD PROTEINS, WHICH ARE CRUCIAL FOR TH      |
| 2DOQ        | A D                 | D        | CRYSTAL STRUCTURE OF SF11P/CDC31P COMPLEX                                           |
| 2DOQ        | B D                 | D        | CRYSTAL STRUCTURE OF SF11P/CDC31P COMPLEX                                           |
| 2DYM        | E F                 | F        | THE CRYSTAL STRUCTURE OF SACCHAROMYCES CEREVISIAE ATG5- ATG16(1-46) COMPLEX         |
| 2E30        | A B                 | B        | SOLUTION STRUCTURE OF THE CYTOPLASMIC REGION OF NA+/H+ EXCHANGER 1 COMPLEXED V      |
| 2E9X        | F G                 | G        | THE CRYSTAL STRUCTURE OF HUMAN GINS CORE COMPLEX                                    |
| 2E9X        | F G                 | G        | THE CRYSTAL STRUCTURE OF HUMAN GINS CORE COMPLEX                                    |
| 2EHO        | J L                 | L        | CRYSTAL STRUCTURE OF HUMAN GINS COMPLEX                                             |
| 2EY4        | A E                 | E        | CRYSTAL STRUCTURE OF A CBF5-NOP10-GAR1 COMPLEX                                      |
| 2F66        | A B                 | A        | STRUCTURE OF THE ESCRT-I ENDOSOMAL TRAFFICKING COMPLEX                              |
| 2FUG        | A C                 | C        | CRYSTAL STRUCTURE OF THE HYDROPHILIC DOMAIN OF RESPIRATORY COMPLEX I FROM THERM     |
| 2G38        | A B                 | B        | A PE/PPE PROTEIN COMPLEX FROM MYCOBACTERIUM TUBERCULOSIS                            |
| 2GGM        | A C                 | C        | HUMAN CENTRIN 2 XERODERMA PIGMENTOSUM GROUP C PROTEIN COMPLEX                       |
| 2GL7        | D E                 | E        | CRYSTAL STRUCTURE OF A BETA-CATENIN/BCL9/TCF4 COMPLEX                               |
| 2HUE        | B C                 | B        | STRUCTURE OF THE H3-H4 CHAPERONE ASF1 BOUND TO HISTONES H3 AND H4                   |
| 2HUE        | B C                 | C        | STRUCTURE OF THE H3-H4 CHAPERONE ASF1 BOUND TO HISTONES H3 AND H4                   |
| 2IBF        | A B                 | B        | HUMAN VINCULIN'S HEAD DOMAIN (VH1, RESIDUES 1-258) IN COMPLEX WITH TWO VINCULIN BI  |
| 2IO5        | B C                 | B        | CRYSTAL STRUCTURE OF THE CIA- HISTONE H3-H4 COMPLEX                                 |
| 2J9U        | C D                 | C        | 2 ANGSTROM X-RAY STRUCTURE OF THE YEAST ESCRT-I VPS28 C- TERMINUS IN COMPLEX WITH   |
| 2NLA        | A B                 | B        | CRYSTAL STRUCTURE OF THE MCL-1:MNOXAB BH3 COMPLEX                                   |
| 2NUP        | B C                 | C        | CRYSTAL STRUCTURE OF THE HUMAN SEC23A/24A HETERODIMER, COMPLEXED WITH THE SNAR      |

TABLE S2

Bullock, et. al

| A. PDB<br>CODE | E. FUNCTION                             | F. $\Delta\Delta G_{\text{AVG,HELIX}}$<br>(KCAL/MOL) | G. $\Delta\Delta G_{\text{SUM,HELIX}}$<br>(KCAL/MOL) | H. $\Delta\Delta G_{\text{SUM,CHAIN}}$<br>(KCAL/MOL) | I. HELIX<br>CONTRIBUTION |
|----------------|-----------------------------------------|------------------------------------------------------|------------------------------------------------------|------------------------------------------------------|--------------------------|
| 1R8U           | TRANSCRIPTION/TRANSCRIPTION ACTIVATOR   | 2.1                                                  | 6.2                                                  | 13.8                                                 | 45%                      |
| 1RF8           | BIOSYNTHETIC PROTEIN, TRANSLATION       | 2.1                                                  | 6.4                                                  | 15.1                                                 | 42%                      |
| 1RIW           | HYDROLASE/BLOOD CLOTTING                | 2.8                                                  | 11.2                                                 | 64.3                                                 | 17%                      |
| 1RK8           | TRANSLATION                             | 2.5                                                  | 10.0                                                 | 15.4                                                 | 65%                      |
| 1RM1           | TRANSCRIPTION/DNA                       | 2.1                                                  | 8.5                                                  | 29.3                                                 | 29%                      |
| 1RM1           | TRANSCRIPTION/DNA                       | 2.0                                                  | 9.8                                                  | 29.3                                                 | 33%                      |
| 1RP3           | TRANSCRIPTION                           | 2.2                                                  | 17.7                                                 | 31.0                                                 | 57%                      |
| 1SA0           | CELL CYCLE                              | 2.6                                                  | 7.8                                                  | 22.0                                                 | 35%                      |
| 1SB0           | TRANSCRIPTION                           | 2.2                                                  | 6.5                                                  | 6.5                                                  | 100%                     |
| 1SYQ           | CELL ADHESION                           | 2.0                                                  | 14.1                                                 | 14.1                                                 | 100%                     |
| 1TCO           | COMPLEX (HYDROLASE/ISOMERASE)           | 2.3                                                  | 16.1                                                 | 22.5                                                 | 72%                      |
| 1TN6           | TRANSFERASE                             | 2.0                                                  | 6.0                                                  | 55.1                                                 | 11%                      |
| 1TQY           | TRANSFERASE                             | 2.0                                                  | 3.9                                                  | 38.9                                                 | 10%                      |
| 1TQY           | TRANSFERASE                             | 2.0                                                  | 5.9                                                  | 28.4                                                 | 21%                      |
| 1TUE           | REPLICATION                             | 3.3                                                  | 10.0                                                 | 10.0                                                 | 100%                     |
| 1UKL           | PROTEIN TRANSPORT/DNA BINDING PROTEIN   | 2.0                                                  | 3.9                                                  | 6.8                                                  | 57%                      |
| 1VCB           | TRANSCRIPTION                           | 2.0                                                  | 7.8                                                  | 7.8                                                  | 100%                     |
| 1VYT           | TRANSPORT PROTEIN                       | 2.9                                                  | 14.5                                                 | 14.5                                                 | 100%                     |
| 1WA8           | TUBERCULOSIS                            | 4.4                                                  | 8.7                                                  | 13.6                                                 | 64%                      |
| 1XB2           | TRANSLATION                             | 2.5                                                  | 5.0                                                  | 23.0                                                 | 22%                      |
| 1XLS           | TRANSCRIPTION                           | 2.1                                                  | 6.2                                                  | 9.1                                                  | 68%                      |
| 1Y74           | TRANSPORT PROTEIN                       | 4.7                                                  | 14.2                                                 | 18.8                                                 | 76%                      |
| 1YFN           | PROTEIN BINDING                         | 2.4                                                  | 4.7                                                  | 11.7                                                 | 40%                      |
| 1YOV           | SIGNALING PROTEIN                       | 2.0                                                  | 6.1                                                  | 32.9                                                 | 19%                      |
| 1Z8U           | ELECTRON TRANSPORT                      | 2.0                                                  | 8.0                                                  | 8.0                                                  | 100%                     |
| 1ZDT           | TRANSCRIPTION                           | 2.0                                                  | 8.1                                                  | 8.1                                                  | 100%                     |
| 1ZUN           | TRANSFERASE                             | 2.0                                                  | 6.0                                                  | 14.8                                                 | 41%                      |
| 1ZW3           | PROTEIN BINDING                         | 2.2                                                  | 8.6                                                  | 10.0                                                 | 86%                      |
| 2A6Q           | TOXIN INHIBITOR/TOXIN                   | 2.4                                                  | 9.5                                                  | 15.0                                                 | 63%                      |
| 2A6Q           | TOXIN INHIBITOR/TOXIN                   | 2.2                                                  | 6.7                                                  | 22.9                                                 | 29%                      |
| 2AST           | CELL CYCLE/LIGASE/PROTEIN TURNOVER      | 2.6                                                  | 12.9                                                 | 18.6                                                 | 69%                      |
| 2B87           | PROTEIN BINDING                         | 2.3                                                  | 7.0                                                  | 11.1                                                 | 63%                      |
| 2B9S           | ISOMERASE/DNA                           | 2.0                                                  | 8.1                                                  | 28.1                                                 | 29%                      |
| 2BZW           | TRANSCRIPTION                           | 2.4                                                  | 12.2                                                 | 18.3                                                 | 67%                      |
| 2C2V           | CHAPERONE                               | 5.5                                                  | 16.4                                                 | 16.4                                                 | 100%                     |
| 2D1P           | TRANSLATION                             | 2.6                                                  | 15.5                                                 | 15.5                                                 | 100%                     |
| 2DOQ           | CELL CYCLE                              | 2.5                                                  | 7.6                                                  | 7.6                                                  | 100%                     |
| 2DOQ           | CELL CYCLE                              | 3.4                                                  | 13.7                                                 | 13.7                                                 | 100%                     |
| 2DYM           | PROTEIN TURNOVER/PROTEIN TURNOVER       | 2.2                                                  | 13.0                                                 | 25.8                                                 | 50%                      |
| 2E30           | METAL BINDING PROTEIN/TRANSPORT PROTEIN | 2.6                                                  | 7.7                                                  | 9.2                                                  | 84%                      |
| 2E9X           | REPLICATION                             | 3.2                                                  | 9.6                                                  | 16.9                                                 | 57%                      |
| 2E9X           | REPLICATION                             | 2.0                                                  | 8.0                                                  | 16.9                                                 | 47%                      |
| 2EHO           | REPLICATION                             | 2.1                                                  | 6.2                                                  | 13.7                                                 | 45%                      |
| 2EY4           | ISOMERASE/BIOSYNTHETIC PROTEIN          | 2.0                                                  | 7.8                                                  | 18.6                                                 | 42%                      |
| 2F66           | TRANSPORT PROTEIN                       | 2.2                                                  | 13.1                                                 | 15.5                                                 | 85%                      |
| 2FUG           | OXIDOREDUCTASE                          | 3.4                                                  | 6.8                                                  | 7.9                                                  | 86%                      |
| 2G38           | STRUCTURAL GENOMICS, UNKNOWN FUNCTION   | 2.5                                                  | 4.9                                                  | 22.9                                                 | 21%                      |
| 2GGM           | CELL CYCLE                              | 3.1                                                  | 12.2                                                 | 12.2                                                 | 100%                     |
| 2GL7           | TRANSCRIPTION                           | 2.1                                                  | 6.3                                                  | 13.6                                                 | 46%                      |
| 2HUE           | DNA BINDING PROTEIN                     | 2.1                                                  | 10.3                                                 | 24.8                                                 | 42%                      |
| 2HUE           | DNA BINDING PROTEIN                     | 2.5                                                  | 17.2                                                 | 22.5                                                 | 76%                      |
| 2IBF           | CELL ADHESION, STRUCTURAL PROTEIN       | 3.3                                                  | 19.8                                                 | 27.9                                                 | 71%                      |
| 2IO5           | CHAPERONE/STRUCTURAL PROTEIN            | 2.0                                                  | 7.8                                                  | 13.3                                                 | 59%                      |
| 2J9U           | PROTEIN TRANSPORT                       | 2.0                                                  | 3.9                                                  | 3.9                                                  | 100%                     |
| 2NLA           | APOPTOSIS                               | 2.2                                                  | 8.6                                                  | 8.6                                                  | 100%                     |
| 2NUP           | PROTEIN TRANSPORT                       | 2.5                                                  | 10.1                                                 | 14.1                                                 | 72%                      |

| A. PDB<br>CODE | J. # HOTSPOT<br>RESIDUES | K. HOTSPOT RESIDUES, RESIDUE #<br>$\Delta\Delta G_{(KCAL/MOL)}$                 |
|----------------|--------------------------|---------------------------------------------------------------------------------|
| 1R8U           | 3                        | E225, 1.7; L228, 2.1; L231, 2.4;                                                |
| 1RF8           | 3                        | F282, 6.6; K287, 2.5; K289, 2.4;                                                |
| 1RIW           | 4                        | W279, 6.0; I280, 1.6; V283, 1.7; I284, 1.9;                                     |
| 1RK8           | 4                        | L133, 1.0; S136, 2.0; L140, 2.7; H141, 4.3;                                     |
| 1RM1           | 4                        | T14, 1.2; I15, 4.0; L23, 1.2; L26, 2.1;                                         |
| 1RM1           | 5                        | L36, 3.0; R39, 1.6; V40, 1.3; V47, 1.9; L52, 2.0;                               |
| 1RP3           | 8                        | D76, 1.8; K78, 1.5; V79, 1.4; V80, 1.7; L83, 2.3; I84, 1.7; F86, 2.5; F87, 4.8; |
| 1SA0           | 3                        | H406, 2.1; W407, 4.5; E411, 1.2;                                                |
| 1SB0           | 3                        | E105, 1.1; L95, 2.0; L99, 3.4;                                                  |
| 1SYQ           | 7                        | L608, 2.2; L609, 1.1; K613, 1.1; L615, 3.0; L622, 3.0; L623, 2.5; R624, 1.2;    |
| 1TCO           | 7                        | V349, 1.3; F350, 5.1; L354, 1.8; F356, 3.0; K360, 1.0; M364, 1.6; L369, 2.3;    |
| 1TN6           | 3                        | Y355, 1.8; Y358, 2.6; R361, 1.6;                                                |
| 1TQY           | 2                        | P149, 1.1; W154, 2.8;                                                           |
| 1TQY           | 3                        | L114, 1.1; Y118, 3.8; L119, 1.0;                                                |
| 1TUE           | 3                        | I19, 2.4; Y23, 5.5; E24, 2.1;                                                   |
| 1UKL           | 2                        | R371, 1.7; Y376, 2.2;                                                           |
| 1VCB           | 4                        | L158, 3.4; R161, 2.4; V166, 1.0; L169, 1.0;                                     |
| 1VYT           | 5                        | L430, 1.0; L434, 1.1; Y437, 4.8; W440, 5.9; I441, 1.7;                          |
| 1WA8           | 2                        | I625, 7.5; L636, 1.2;                                                           |
| 1XB2           | 2                        | K60, 1.4; R67, 3.6;                                                             |
| 1XLS           | 3                        | L744, 1.4; L745, 2.9; L749, 1.9;                                                |
| 1Y74           | 3                        | L19, 1.8; D22, 5.2; L33, 7.2;                                                   |
| 1YFN           | 2                        | P6, 1.1; K11, 3.6;                                                              |
| 1YOV           | 3                        | Y478, 1.2; E481, 1.3; R484, 3.6;                                                |
| 1Z8U           | 4                        | D43, 1.7; F47, 2.8; Y48, 1.0; Y51, 2.5;                                         |
| 1ZDT           | 4                        | L744, 1.9; L745, 2.8; L748, 1.2; L749, 2.2;                                     |
| 1ZUN           | 3                        | L11, 2.9; R20, 1.6; H7, 1.5;                                                    |
| 1ZW3           | 4                        | L1633, 1.6; V1640, 1.6; L1647, 3.2; I1648, 2.2;                                 |
| 2A6Q           | 4                        | N69, 1.4; R72, 2.9; L73, 1.8; L80, 3.4;                                         |
| 2A6Q           | 3                        | W10, 2.5; Y13, 2.2; E8, 2.0;                                                    |
| 2AST           | 5                        | E3040, 2.1; S3041, 1.4; E3042, 6.5; R3044, 1.7; N3045, 1.2;                     |
| 2B87           | 3                        | W11, 1.2; W14, 3.5; F17, 2.3;                                                   |
| 2B9S           | 4                        | R226, 2.1; I227, 1.6; I228, 1.0; W231, 3.4;                                     |
| 2BZW           | 5                        | Y105, 2.8; L109, 2.5; D114, 2.0; F116, 3.7; E117, 1.2;                          |
| 2C2V           | 3                        | F42, 1.8; L45, 13.1; L48, 1.5;                                                  |
| 2DIP           | 6                        | Y79, 3.5; T80, 1.4; F82, 3.7; V83, 3.3; R84, 1.3; V87, 2.3;                     |
| 2DOQ           | 3                        | F237, 2.3; W240, 3.8; L245, 1.5;                                                |
| 2DOQ           | 4                        | F258, 3.2; L264, 2.6; F268, 2.2; W271, 5.7;                                     |
| 2DYM           | 6                        | L28, 1.8; I29, 1.5; R31, 1.8; L32, 2.6; R35, 3.9; E39, 1.4;                     |
| 2E30           | 3                        | I522, 5.5; H523, 1.0; E535, 1.2;                                                |
| 2E9X           | 3                        | L175, 2.3; F186, 3.3; W189, 4.0;                                                |
| 2E9X           | 4                        | L139, 1.1; F142, 1.4; F146, 3.4; M150, 2.1;                                     |
| 2EHO           | 3                        | W71, 1.5; L72, 3.2; L76, 1.5;                                                   |
| 2EY4           | 4                        | R45, 2.8; K49, 2.2; R50, 1.4; L53, 1.4;                                         |
| 2F66           | 6                        | L356, 2.7; F359, 1.0; R368, 1.1; F371, 3.0; W375, 2.3; H376, 3.0;               |
| 2FUG           | 2                        | M107, 5.1; L113, 1.7;                                                           |
| 2G38           | 2                        | Y153, 3.0; L161, 1.9;                                                           |
| 2GGM           | 4                        | W848, 5.4; L851, 2.1; L855, 2.9; L856, 1.8;                                     |
| 2GL7           | 3                        | V44, 1.1; L48, 3.6; V49, 1.6;                                                   |
| 2HUE           | 5                        | L100, 2.0; V101, 1.5; F104, 1.9; L92, 2.8; Y99, 2.1;                            |
| 2HUE           | 7                        | I50, 2.7; L58, 1.3; K59, 1.0; F61, 2.8; E63, 4.9; I66, 3.3; V70, 1.2;           |
| 2IBF           | 6                        | I566, 2.4; Y567, 10.2; K571, 1.2; L577, 3.2; S578, 1.1; L581, 1.7;              |
| 2IO5           | 4                        | L100, 1.9; F104, 3.0; L92, 1.5; Y99, 1.4;                                       |
| 2J9U           | 2                        | H178, 1.7; R190, 2.2;                                                           |
| 2NLA           | 4                        | L78, 2.8; I81, 1.6; D83, 2.8; V85, 1.4;                                         |
| 2NUP           | 4                        | D116, 6.6; Q120, 1.2; K121, 1.2; K124, 1.1;                                     |

TABLE S2

Bullock, et. al

| A. PDB<br>CODE | L. HOTSPOT RESIDUE<br>HELIX POSITIONS   | M. HOTSPOT RESIDUE<br>END TO END LENGTH | N. HELIX<br>LENGTH | O. HELIX START<br>RESIDUE # | P. HELIX END<br>RESIDUE # |
|----------------|-----------------------------------------|-----------------------------------------|--------------------|-----------------------------|---------------------------|
| 1R8U           | i; i+3; i+6;                            | 12                                      | 12                 | 225                         | 236                       |
| 1RF8           | i; i+5; i+7;                            | 11                                      | 12                 | 280                         | 291                       |
| 1RIW           | i; i+1; i+4; i+5;                       | 9                                       | 10                 | 277                         | 286                       |
| 1RK8           | i; i+3; i+7; i+8;                       | 8                                       | 26                 | 117                         | 142                       |
| 1RM1           | i; i+1; i+9; i+12;                      | 6                                       | 16                 | 14                          | 29                        |
| 1RM1           | i; i+3; i+4; i+11; i+16;                | 8                                       | 22                 | 34                          | 55                        |
| 1RP3           | i; i+2; i+3; i+4; i+7; i+8; i+10; i+11; | 9                                       | 13                 | 76                          | 88                        |
| 1SA0           | i; i+1; i+5;                            | 9                                       | 8                  | 405                         | 412                       |
| 1SB0           | i; i+4; i+10;                           | 21                                      | 21                 | 89                          | 109                       |
| 1SYQ           | i; i+1; i+5; i+7; i+14; i+15; i+16;     | 17                                      | 20                 | 608                         | 627                       |
| 1TCO           | i; i+1; i+5; i+7; i+11; i+15; i+20;     | 14                                      | 22                 | 349                         | 370                       |
| 1TN6           | i; i+3; i+6;                            | 12                                      | 15                 | 353                         | 367                       |
| 1TQY           | i; i+5;                                 | 11                                      | 12                 | 145                         | 156                       |
| 1TQY           | i; i+4; i+5;                            | 18                                      | 12                 | 111                         | 122                       |
| 1TUE           | i; i+4; i+5;                            | 7                                       | 22                 | 5                           | 26                        |
| 1UKL           | i; i+5;                                 | 15                                      | 21                 | 371                         | 391                       |
| 1VCB           | i; i+3; i+8; i+11;                      | 9                                       | 13                 | 158                         | 170                       |
| 1VYT           | i; i+4; i+7; i+10; i+11;                | 9                                       | 22                 | 424                         | 445                       |
| 1WA8           | i; i+11;                                | 6                                       | 34                 | 610                         | 643                       |
| 1XB2           | i; i+7;                                 | 11                                      | 15                 | 57                          | 71                        |
| 1XLS           | i; i+1; i+5;                            | 9                                       | 9                  | 743                         | 751                       |
| 1Y74           | i; i+3; i+14;                           | 12                                      | 19                 | 19                          | 37                        |
| 1YFN           | i; i+5;                                 | 12                                      | 6                  | 6                           | 11                        |
| 1YOV           | i; i+3; i+6;                            | 13                                      | 11                 | 476                         | 486                       |
| 1Z8U           | i; i+4; i+5; i+8;                       | 21                                      | 21                 | 34                          | 54                        |
| 1ZDT           | i; i+1; i+4; i+5;                       | 12                                      | 9                  | 743                         | 751                       |
| 1ZUN           | i; i+4; i+13;                           | 8                                       | 20                 | 7                           | 26                        |
| 1ZW3           | i; i+7; 15; 16;                         | 16                                      | 19                 | 1631                        | 1649                      |
| 2A6Q           | i; i+3; i+4; i+11;                      | 13                                      | 16                 | 67                          | 82                        |
| 2A6Q           | i; i+2; i+5;                            | 16                                      | 12                 | 7                           | 18                        |
| 2AST           | i; i+1; i+2; i+4; i+5;                  | 13                                      | 8                  | 3040                        | 3047                      |
| 2B87           | i; i+3; i+6;                            | 8                                       | 15                 | 4                           | 18                        |
| 2B9S           | i; i+1; i+2; i+5;                       | 9                                       | 10                 | 225                         | 234                       |
| 2BZW           | i; i+4; i+9; i+11; i+12;                | 8                                       | 20                 | 100                         | 119                       |
| 2C2V           | i; i+3; i+6;                            | 8                                       | 14                 | 40                          | 53                        |
| 2D1P           | i; i+1; i+3; i+4; i+5; i+8;             | 8                                       | 11                 | 79                          | 89                        |
| 2DOQ           | i; i+3; i+8;                            | 9                                       | 26                 | 224                         | 249                       |
| 2DOQ           | i; i+6; i+10; i+13;                     | 9                                       | 41                 | 252                         | 292                       |
| 2DYM           | i; i+1; i+3; i+4; i+7; i+11;            | 9                                       | 18                 | 24                          | 41                        |
| 2E30           | i; i+1; i+13;                           | 14                                      | 21                 | 518                         | 538                       |
| 2E9X           | i; i+11; i+14;                          | 12                                      | 23                 | 170                         | 192                       |
| 2E9X           | i; i+3; i+7; i+11;                      | 6                                       | 24                 | 131                         | 154                       |
| 2EHO           | i; i+1; i+5;                            | 9                                       | 8                  | 70                          | 77                        |
| 2EY4           | i; i+4; i+5; i+8;                       | 7                                       | 13                 | 42                          | 54                        |
| 2F66           | i; i+3; i+12; i+15; i+19; i+20;         | 8                                       | 26                 | 356                         | 381                       |
| 2FUG           | i; i+6;                                 | 11                                      | 17                 | 98                          | 114                       |
| 2G38           | i; i+8;                                 | 12                                      | 36                 | 129                         | 164                       |
| 2GGM           | i; i+3; i+7; i+8;                       | 7                                       | 16                 | 848                         | 863                       |
| 2GL7           | i; i+4; i+5;                            | 12                                      | 9                  | 42                          | 50                        |
| 2HUE           | i; i+7; i+8; i+9; i+12;                 | 7                                       | 29                 | 86                          | 114                       |
| 2HUE           | i; i+8; i+9; i+11; i+13; i+16; i+20;    | 19                                      | 27                 | 50                          | 76                        |
| 2IBF           | i; i+1; i+5; i+11; i+12; i+15;          | 20                                      | 18                 | 565                         | 582                       |
| 2IO5           | i; i+7; i+8; i+12;                      | 8                                       | 29                 | 86                          | 114                       |
| 2J9U           | i; i+12;                                | 7                                       | 19                 | 174                         | 192                       |
| 2NLA           | i; i+3; i+5; i+7;                       | 8                                       | 15                 | 77                          | 91                        |
| 2NUP           | i; i+4; i+5; i+8;                       | 8                                       | 10                 | 116                         | 125                       |

TABLE S2

Bullock, et. al

| A. PDB<br>CODE | Q. HELIX SEQUENCE                         | R. RESOLUTION |
|----------------|-------------------------------------------|---------------|
| 1R8U           | EEVLM SLVIEMG                             | NOT APP       |
| 1RF8           | PTFLLQFKDKLN                              | NOT APP       |
| 1RIW           | KKWVQKVIDQ                                | 2.04          |
| 1RK8           | PEGLRCFY YLVQDLKCLV FSLIGLHF              | 1.90          |
| 1RM1           | TIGNSLVDALDTLISD                          | 2.50          |
| 1RM1           | ASLAMRVLET FDKVVAETLKDN                   | 2.50          |
| 1RP3           | DEKVVKGLIEFFT                             | 2.30          |
| 1SA0           | VHWYV GEG                                 | 3.58          |
| 1SB0           | EKRILELELLMSTENELKGQ                      | NOT APP       |
| 1SYQ           | LLQAAKGLAGAVSELLRSAQ                      | 2.42          |
| 1TCO           | VFTWVSLPFVGEKVTEMLVNVLN                   | 2.50          |
| 1TN6           | KEYWRYIGRSLQSKH                           | 1.80          |
| 1TQY           | PSVMPAEVAWAV                              | 2.00          |
| 1TQY           | ATSLEREYLLLS                              | 2.00          |
| 1TUE           | KETLSERLSALQDKIIDHYEND                    | 2.10          |
| 1UKL           | RKAIDYIKYLQQVNHKLRQEN                     | 3.00          |
| 1VCB           | LKERCLQVVRSLV                             | 2.70          |
| 1VYT           | LREKQQLEEDLKG YLDWITQAE                   | 2.60          |
| 1WA8           | GIEAAASAIQGNVTSIHSLLDEGKQSLTKLAAAW        | NOT APP       |
| 1XB2           | ASSKELLMKLRRTG                            | 2.20          |
| 1XLS           | ALLRYLLDK                                 | 2.96          |
| 1Y74           | LERDVSRV ELLERLQRSG                       | NOT APP       |
| 1YFN           | PHQWQK                                    | 1.80          |
| 1YOV           | DDYVHEFCRYG                               | 2.60          |
| 1Z8U           | EEDMVTVV EDDWMNFYINYYRQ                   | 2.40          |
| 1ZDT           | ALLRYLLDK                                 | 2.10          |
| 1ZUN           | HLKQLEAESIHIREVAAEF                       | 2.70          |
| 1ZW3           | SVLAGHSRTVSDSIKKLIT                       | 3.30          |
| 2A6Q           | PANARRLMDSIDSLKS                          | 2.05          |
| 2A6Q           | EESWDDYLYWQE                              | 2.05          |
| 2AST           | ESEWRNLG                                  | 2.30          |
| 2B87           | KFNKELGWATWEIFN                           | NOT APP       |
| 2B9S           | PRIICSWAKA                                | 2.27          |
| 2BZW           | WAAQRYGRELRRMSDEFEGS                      | 2.30          |
| 2C2V           | RNFRLLEELEEGQK                            | 2.90          |
| 2D1P           | YTDVRLTVKH                                | 2.15          |
| 2DOQ           | FANQAKLRVQEAVFYIWSDKTLKYSQ                | 3.00          |
| 2DOQ           | NDEAESFRNTWLLFRSFQQWITLTQTFKEQSRLADQAFLNK | 3.00          |
| 2DYM           | MDDLIRRLTDRNDKEAH                         | 2.20          |
| 2E30           | INEEHTQFLDHLLTGIEDIC                      | NOT APP       |
| 2E9X           | EMERGLFQTGGKGLNDFQCWEKG                   | 2.30          |
| 2E9X           | NADISQSLQTFIGRFRIMDSSQ                    | 2.30          |
| 2EHO           | LWLAKGLF                                  | 3.00          |
| 2EY4           | GEYRRRWKREVLG                             | 2.11          |
| 2F66           | LDTFVKQGRELARQQFLVRWHIQRIT                | 2.80          |
| 2FUG           | DVVREAQAGMVEFTLLN                         | 3.30          |
| 2G38           | TAQIADLDQEYDDFWDEDGEVMRDYRLRVSDALSKL      | 2.20          |
| 2GGM           | WKLLAKGLLIRERLKR                          | 2.35          |
| 2GL7           | ADVKSSLVN                                 | 2.60          |
| 2HUE           | SSAVMALQEASEAYLVALFEDTNLCAIHA             | 1.70          |
| 2HUE           | IYEETRGLVKVFLENVIRDAVITYTEHA              | 1.70          |
| 2IBF           | AIYEKAKEVSSALSKVLS                        | 3.20          |
| 2IO5           | SSAVMALQEASEAYLVGLFEDTNLCAIHA             | 2.70          |
| 2J9U           | KDQLHPLLAELLISINRVT                       | 2.00          |
| 2NLA           | QLRRIGDKVNLRQKL                           | 2.80          |
| 2NUP           | DTFIQTKKLL                                | 2.80          |



| A. PDB CODE | B. INTERFACE CHAINS | C. CHAIN | D. TITLE                                                                          |
|-------------|---------------------|----------|-----------------------------------------------------------------------------------|
| 2O8F        | A B                 | B        | HUMAN MUTSALPHA (MSH2/MSH6) BOUND TO DNA WITH A SINGLE BASE T INSERT              |
| 2OBH        | A C                 | C        | CENTRIN-XPC PEPTIDE                                                               |
| 2ODE        | A B                 | A        | CRYSTAL STRUCTURE OF THE HETERODIMERIC COMPLEX OF HUMAN RGS8 AND ACTIVATED G12    |
| 2ONL        | B D                 | B        | CRYSTAL STRUCTURE OF THE P38A-MAPKAP KINASE 2 HETERODIMER                         |
| 2OZA        | A B                 | B        | STRUCTURE OF P38ALPHA COMPLEX                                                     |
| 2P1L        | A B                 | B        | STRUCTURE OF THE BCL-XL:BECLIN 1 COMPLEX                                          |
| 2P1N        | D E                 | D        | MECHANISM OF AUXIN PERCEPTION BY THE TIR1 UBIQUITIN LIGASE                        |
| 2P22        | A C                 | A        | STRUCTURE OF THE YEAST ESCRT-I HETEROTETRAMER CORE                                |
| 2P22        | A C                 | C        | STRUCTURE OF THE YEAST ESCRT-I HETEROTETRAMER CORE                                |
| 2PBI        | A B                 | A        | THE MULTIFUNCTIONAL NATURE OF GBETA5/RGS9 REVEALED FROM ITS CRYSTAL STRUCTURE     |
| 2PBI        | A B                 | A        | THE MULTIFUNCTIONAL NATURE OF GBETA5/RGS9 REVEALED FROM ITS CRYSTAL STRUCTURE     |
| 2PRG        | A C                 | C        | LIGAND-BINDING DOMAIN OF THE HUMAN PEROXISOME PROLIFERATOR ACTIVATED RECEPTOR     |
| 2PSM        | B C                 | B        | CRYSTAL STRUCTURE OF INTERLEUKIN 15 IN COMPLEX WITH INTERLEUKIN 15 RECEPTOR ALPH  |
| 2PV2        | D F                 | F        | CRYSTALLOGRAPHIC STRUCTURE OF SURA FIRST PEPTIDYL-PROLYL ISOMERASE DOMAIN COMI    |
| 2Q0O        | A C                 | C        | CRYSTAL STRUCTURE OF AN ANTI-ACTIVATION COMPLEX IN BACTERIAL QUORUM SENSING       |
| 2QB0        | A D                 | A        | STRUCTURE OF THE 2TEL CRYSTALLIZATION MODULE FUSED TO T4 LYSOZYME WITH AN ALA-GI  |
| 2QL2        | A B                 | B        | CRYSTAL STRUCTURE OF THE BASIC-HELIX-LOOP-HELIX DOMAINS OF THE HETERODIMER E47/N  |
| 2QXV        | A B                 | B        | STRUCTURAL BASIS OF EZH2 RECOGNITION BY EED                                       |
| 2RGN        | D E                 | E        | CRYSTAL STRUCTURE OF P63RHOGEF COMPLEX WITH GALPHA-Q AND RHOA                     |
| 2ROC        | A B                 | B        | SOLUTION STRUCTURE OF MCL-1 COMPLEXED WITH PUMA                                   |
| 2ROD        | A B                 | B        | SOLUTION STRUCTURE OF MCL-1 COMPLEXED WITH NOXAA                                  |
| 2SIV        | C D                 | D        | SIV GP41 CORE STRUCTURE                                                           |
| 2UXN        | A B                 | A        | STRUCTURAL BASIS OF HISTONE DEMETHYLATION BY LSD1 REVEALED BY SUICIDE INACTIVATI  |
| 2V6X        | A B                 | A        | STRUCTURAL INSIGHT INTO THE INTERACTION BETWEEN ESCRT-III AND VPS4                |
| 2VE7        | A C                 | C        | CRYSTAL STRUCTURE OF A BONSAI VERSION OF THE HUMAN NDC80 COMPLEX                  |
| 2VOF        | C D                 | D        | STRUCTURE OF MOUSE A1 BOUND TO THE PUMA BH3-DOMAIN                                |
| 2VOI        | A B                 | B        | STRUCTURE OF MOUSE A1 BOUND TO THE BID BH3-DOMAIN                                 |
| 2W85        | A B                 | B        | STRUCTURE OF PEX14 IN COMPLEX WITH PEX19                                          |
| 2Z2S        | A B                 | A        | CRYSTAL STRUCTURE OF RHODOBACTER SPHAEROIDES SIGE IN COMPLEX WITH THE ANTI-SIGM   |
| 2Z2T        | B E                 | B        | CRYSTAL STRUCTURE OF THE COMPLEX BETWEEN GP41 FRAGMENT N36 AND FUSION INHIBITOF   |
| 2Z2T        | C F                 | C        | CRYSTAL STRUCTURE OF THE COMPLEX BETWEEN GP41 FRAGMENT N36 AND FUSION INHIBITOF   |
| 3B9F        | L H                 | L        | 1.6 A STRUCTURE OF THE PCI-THROMBIN-HEPARIN COMPLEX                               |
| 3BC1        | A B                 | B        | CRYSTAL STRUCTURE OF THE COMPLEX RAB27A-SLP2A                                     |
| 3BL2        | A C                 | C        | CRYSTAL STRUCTURE OF M11, THE BCL-2 HOMOLOG OF MURINE GAMMA- HERPESVIRUS 68, COM  |
| 3BOW        | B C                 | C        | STRUCTURE OF M-CALPAIN IN COMPLEX WITH CALPASTATIN                                |
| 3BPL        | A B                 | A        | CRYSTAL STRUCTURE OF THE IL4-IL4R-COMMON GAMMA TERNARY COMPLEX                    |
| 3BPQ        | A B                 | A        | CRYSTAL STRUCTURE OF RELB-RELE ANTITOXIN-TOXIN COMPLEX FROM METHANOCOCCUS JAI     |
| 3BXK        | A B                 | B        | CRYSTAL STRUCTURE OF THE P/Q-TYPE CALCIUM CHANNEL (CAV2.1) IQ DOMAIN AND CA2+CALI |
| 3C4M        | A C                 | C        | STRUCTURE OF HUMAN PARATHYROID HORMONE IN COMPLEX WITH THE EXTRACELLULAR DO       |
| 3DI2        | A B                 | A        | CRYSTAL STRUCTURE OF THE COMPLEX OF HUMAN INTERLEUKIN-7 WITH UNGLYCOSYLATED H     |
| 3DVU        | B D                 | D        | CRYSTAL STRUCTURE OF THE COMPLEX OF MURINE GAMMA- HERPESVIRUS 68 BCL-2 HOMOLO     |
| 3E95        | B C                 | C        | CRYSTAL STRUCTURE OF THE PLASMODIUM FALCIPARUM UBIQUITIN CONJUGATING ENZYME C     |
| 3EX7        | A C                 | C        | THE CRYSTAL STRUCTURE OF EJC IN ITS TRANSITION STATE                              |
| 3FAL        | C D                 | D        | HUMANRXR ALPHA & MOUSE LXR ALPHA COMPLEXED WITH RETENOIC ACID AND GSK2186         |
| 3GJX        | E D                 | D        | CRYSTAL STRUCTURE OF THE NUCLEAR EXPORT COMPLEX CRM1- SNURPORTIN1-RANGTP          |
| 3HHR        | A C                 | A        | HUMAN GROWTH HORMONE AND EXTRACELLULAR DOMAIN OF ITS RECEPTOR: CRYSTAL STRU       |
| 3HJW        | A B                 | B        | STRUCTURE OF A FUNCTIONAL RIBONUCLEOPROTEIN PSEUDOURIDINE SYNTHASE BOUND TO A     |

TABLE S2

Bullock, et. al

| A. PDB<br>CODE | E. FUNCTION                            | F. $\Delta\Delta G_{\text{AVG,HELIX}}$<br>(KCAL/MOL) | G. $\Delta\Delta G_{\text{SUM,HELIX}}$<br>(KCAL/MOL) | H. $\Delta\Delta G_{\text{SUM,CHAIN}}$<br>(KCAL/MOL) | I. HELIX<br>CONTRIBUTION |
|----------------|----------------------------------------|------------------------------------------------------|------------------------------------------------------|------------------------------------------------------|--------------------------|
| 2O8F           | DNA BINDING PROTEIN/DNA                | 2.1                                                  | 4.2                                                  | 25.5                                                 | 16%                      |
| 2OBH           | CELL CYCLE                             | 3.6                                                  | 14.4                                                 | 14.4                                                 | 100%                     |
| 2ODE           | SIGNALING PROTEIN                      | 2.1                                                  | 6.3                                                  | 8.6                                                  | 73%                      |
| 2ONL           | TRANSFERASE                            | 2.6                                                  | 10.5                                                 | 14.1                                                 | 74%                      |
| 2OZA           | SIGNALING PROTEIN/TRANSFERASE          | 2.2                                                  | 6.6                                                  | 27.8                                                 | 24%                      |
| 2P1L           | APOPTOSIS                              | 2.0                                                  | 10.2                                                 | 10.2                                                 | 100%                     |
| 2P1N           | SIGNALING PROTEIN                      | 2.1                                                  | 4.1                                                  | 12.4                                                 | 33%                      |
| 2P22           | TRANSPORT PROTEIN                      | 3.2                                                  | 12.8                                                 | 27.7                                                 | 46%                      |
| 2P22           | TRANSPORT PROTEIN                      | 2.0                                                  | 8.0                                                  | 19.9                                                 | 40%                      |
| 2PBI           | SIGNALING PROTEIN                      | 2.1                                                  | 8.2                                                  | 45.7                                                 | 18%                      |
| 2PBI           | SIGNALING PROTEIN                      | 2.7                                                  | 10.7                                                 | 45.7                                                 | 23%                      |
| 2PRG           | COMPLEX (THIAZOLIDINEDIONE/RECEPTOR)   | 2.0                                                  | 8.1                                                  | 8.1                                                  | 100%                     |
| 2PSM           | CYTOKINE                               | 2.7                                                  | 13.5                                                 | 19.5                                                 | 69%                      |
| 2PV2           | ISOMERASE                              | 2.1                                                  | 10.4                                                 | 11.5                                                 | 90%                      |
| 2Q0O           | TRANSCRIPTION                          | 2.4                                                  | 9.4                                                  | 14.2                                                 | 66%                      |
| 2QB0           | HYDROLASE REGULATOR                    | 3.0                                                  | 9.0                                                  | 11.5                                                 | 78%                      |
| 2QL2           | TRANSCRIPTION/DNA                      | 2.0                                                  | 12.0                                                 | 13.8                                                 | 87%                      |
| 2QXV           | GENE REGULATION                        | 2.4                                                  | 14.2                                                 | 14.2                                                 | 100%                     |
| 2RGN           | SIGNALING PROTEIN COMPLEX              | 2.1                                                  | 6.3                                                  | 13.8                                                 | 46%                      |
| 2ROC           | APOPTOSIS                              | 2.4                                                  | 12.1                                                 | 12.1                                                 | 100%                     |
| 2ROD           | APOPTOSIS                              | 2.5                                                  | 12.4                                                 | 12.4                                                 | 100%                     |
| 2SIV           | ENVELOPE GLYCOPROTEIN                  | 2.0                                                  | 3.9                                                  | 9.6                                                  | 41%                      |
| 2UXN           | OXIDOREDUCTASE/TRANSCRIPTION REGULATOR | 2.4                                                  | 9.7                                                  | 26.6                                                 | 36%                      |
| 2V6X           | PROTEIN TRANSPORT                      | 2.3                                                  | 6.8                                                  | 11.5                                                 | 59%                      |
| 2VE7           | CELL CYCLE                             | 2.7                                                  | 13.4                                                 | 28.9                                                 | 46%                      |
| 2VOF           | APOPTOSIS                              | 2.5                                                  | 17.3                                                 | 19.4                                                 | 89%                      |
| 2VOI           | APOPTOSIS                              | 2.1                                                  | 8.2                                                  | 8.2                                                  | 100%                     |
| 2W85           | PROTEIN TRANSPORT                      | 2.0                                                  | 4.0                                                  | 4.0                                                  | 100%                     |
| 2Z2S           | TRANSCRIPTION                          | 2.4                                                  | 7.1                                                  | 27.8                                                 | 26%                      |
| 2Z2T           | VIRAL PROTEIN/INHIBITOR                | 2.0                                                  | 7.8                                                  | 7.8                                                  | 100%                     |
| 2Z2T           | VIRAL PROTEIN/INHIBITOR                | 2.2                                                  | 6.6                                                  | 9.0                                                  | 73%                      |
| 3B9F           | HYDROLASE/HYDROLASE INHIBITOR          | 2.3                                                  | 9.0                                                  | 17.6                                                 | 51%                      |
| 3BC1           | SIGNALING PROTEIN/TRANSPORT PROTEIN    | 2.1                                                  | 10.6                                                 | 15.3                                                 | 69%                      |
| 3BL2           | VIRAL PROTEIN/APOPTOSIS                | 2.4                                                  | 12.1                                                 | 12.1                                                 | 100%                     |
| 3BOW           | HYDROLASE/HYDROLASE INHIBITOR          | 2.2                                                  | 6.5                                                  | 8.8                                                  | 74%                      |
| 3BPL           | CYTOKINE/CYTOKINE RECEPTOR             | 2.0                                                  | 8.1                                                  | 12.6                                                 | 64%                      |
| 3BPQ           | TOXIN                                  | 2.2                                                  | 11.1                                                 | 13.1                                                 | 85%                      |
| 3BXK           | MEMBRANE PROTEIN, SIGNALING PROTEIN    | 2.1                                                  | 12.3                                                 | 12.3                                                 | 100%                     |
| 3C4M           | MEMBRANE PROTEIN                       | 2.8                                                  | 11.3                                                 | 12.4                                                 | 91%                      |
| 3DI2           | CYTOKINE/CYTOKINE RECEPTOR             | 2.4                                                  | 9.7                                                  | 13.5                                                 | 72%                      |
| 3DVU           | VIRAL PROTEIN/APOPTOSIS                | 2.0                                                  | 7.9                                                  | 9.1                                                  | 87%                      |
| 3E95           | LIGASE                                 | 2.2                                                  | 11.2                                                 | 11.2                                                 | 100%                     |
| 3EX7           | HYDROLASE/RNA BINDING PROTEIN/RNA      | 2.7                                                  | 10.6                                                 | 10.6                                                 | 100%                     |
| 3FAL           | SIGNALING PROTEIN                      | 2.0                                                  | 3.9                                                  | 6.2                                                  | 63%                      |
| 3GJX           | PROTEIN TRANSPORT                      | 2.0                                                  | 3.9                                                  | 9.7                                                  | 40%                      |
| 3HHR           | HORMONE/RECEPTOR                       | 2.1                                                  | 8.3                                                  | 8.3                                                  | 100%                     |
| 3HJW           | ISOMERASE/RNA                          | 2.1                                                  | 8.3                                                  | 18.7                                                 | 44%                      |

TABLE S2

| A. PDB<br>CODE | J. # HOTSPOT<br>RESIDUES | K. HOTSPOT RESIDUES, RESIDUE #<br>$\Delta\Delta G_{(KCAL/MOL)}$              |
|----------------|--------------------------|------------------------------------------------------------------------------|
| 2O8F           | 2                        | F1222, 2.8; I1227, 1.4;                                                      |
| 2OBH           | 4                        | W848, 7.7; L851, 1.7; L855, 3.1; L856, 1.9;                                  |
| 2ODE           | 3                        | E207, 2.7; K210, 2.4; H213, 1.2;                                             |
| 2ONL           | 4                        | H126, 2.6; F129, 4.4; L130, 2.5; R136, 1.0;                                  |
| 2OZA           | 3                        | H126, 2.6; F129, 1.9; Y132, 2.1;                                             |
| 2P1L           | 5                        | L112, 1.6; L116, 2.2; K117, 1.3; D121, 2.0; F123, 3.1;                       |
| 2P1N           | 2                        | V151, 3.0; W157, 1.1;                                                        |
| 2P22           | 4                        | Y329, 9.2; D340, 1.4; L345, 1.0; R347, 1.2;                                  |
| 2P22           | 4                        | L150, 2.6; K153, 2.4; L154, 1.0; E169, 2.0;                                  |
| 2PBI           | 4                        | L244, 2.5; I247, 1.4; V248, 1.6; Y250, 2.7;                                  |
| 2PBI           | 4                        | I226, 1.8; Y228, 3.2; Y229, 2.7; L233, 3.0;                                  |
| 2PRG           | 4                        | K632, 1.1; L633, 2.3; L636, 1.5; L637, 3.2;                                  |
| 2PSM           | 5                        | E46, 4.6; Q48, 1.1; V49, 2.4; H52, 2.0; E53, 3.4;                            |
| 2PV2           | 5                        | F10, 1.1; T3, 1.2; L4, 1.6; W7, 5.2; D8, 1.3;                                |
| 2Q0O           | 4                        | R40, 1.8; Y50, 2.6; W53, 3.8; L54, 1.2;                                      |
| 2QB0           | 3                        | E68, 1.3; Y72, 3.4; R73, 4.3;                                                |
| 2QL2           | 6                        | K139, 1.1; L143, 3.0; K147, 2.1; Y149, 1.9; I150, 1.9; L153, 2.0;            |
| 2QXV           | 6                        | F42, 4.3; R46, 1.5; I49, 2.2; R52, 2.4; L56, 1.7; W60, 2.1;                  |
| 2RGN           | 3                        | E215, 1.4; W216, 1.3; Y220, 3.6;                                             |
| 2ROC           | 5                        | L141, 3.9; I144, 2.1; D146, 1.1; L148, 1.8; Y152, 3.2;                       |
| 2ROD           | 5                        | F23, 3.6; L27, 2.4; I30, 2.7; D32, 1.1; W38, 2.6;                            |
| 2SIV           | 2                        | W631, 2.6; I642, 1.3;                                                        |
| 2UXN           | 4                        | I474, 2.4; F478, 3.7; D486, 1.5; Y494, 2.1;                                  |
| 2V6X           | 3                        | F60, 2.1; L64, 1.5; R66, 3.2;                                                |
| 2VE7           | 5                        | F127, 1.1; F130, 4.2; R131, 1.2; Y138, 5.7; F141, 1.2;                       |
| 2VOF           | 7                        | W133, 3.2; I137, 2.2; L141, 2.1; R142, 2.7; I144, 1.1; D146, 3.9; L148, 2.1; |
| 2VOI           | 4                        | I82, 1.5; I86, 2.3; L90, 2.0; D95, 2.4;                                      |
| 2W85           | 2                        | F105, 1.3; F110, 2.7;                                                        |
| 2Z2S           | 3                        | F30, 3.6; H32, 1.1; K38, 2.4;                                                |
| 2Z2T           | 4                        | H2564, 1.0; L2565, 2.1; L2568, 2.2; W2571, 2.5;                              |
| 2Z2T           | 3                        | Q3551, 1.6; L3568, 2.3; W3571, 2.7;                                          |
| 3B9F           | 4                        | E14, 1.4; E14, 2.9; L14, 2.1; Y14, 2.6;                                      |
| 3BC1           | 5                        | I15, 1.3; V18, 1.7; R21, 2.6; L25, 2.0; R32, 3.0;                            |
| 3BL2           | 5                        | L110, 2.9; L114, 2.5; K115, 1.3; D119, 1.3; F121, 4.1;                       |
| 3BOW           | 3                        | I653, 2.7; L656, 2.7; D659, 1.1;                                             |
| 3BPL           | 4                        | R81, 2.1; R85, 1.0; R88, 3.4; W91, 1.6;                                      |
| 3BPQ           | 5                        | E21, 3.0; I23, 1.0; L24, 2.4; L28, 2.6; M32, 2.1;                            |
| 3BXK           | 6                        | I1961, 1.9; Y1962, 1.6; M1965, 1.0; I1967, 3.1; Y1971, 2.7; R1972, 2.0;      |
| 3C4M           | 4                        | R20, 5.9; W23, 1.8; L24, 2.6; L28, 1.0;                                      |
| 3DI2           | 4                        | K10, 3.2; V15, 1.8; L16, 3.3; V18, 1.4;                                      |
| 3DVU           | 4                        | L112, 1.9; L116, 1.6; D121, 1.2; F123, 3.2;                                  |
| 3E95           | 5                        | F28, 5.1; L31, 1.3; D32, 1.6; L34, 2.2; Q38, 1.0;                            |
| 3EX7           | 4                        | R387, 2.0; R390, 4.5; D391, 2.2; Q394, 1.9;                                  |
| 3FAL           | 2                        | L400, 1.4; R413, 2.5;                                                        |
| 3GJX           | 2                        | V518, 1.2; L525, 2.7;                                                        |
| 3HHR           | 4                        | D11, 2.1; N12, 2.0; R16, 1.9; R8, 2.3;                                       |
| 3HJW           | 4                        | R45, 2.8; R46, 2.3; K49, 1.7; R50, 1.5;                                      |

TABLE S2

Bullock, et. al

| A. PDB CODE | L. HOTSPOT RESIDUE HELIX POSITIONS  | M. HOTSPOT RESIDUE END TO END LENGTH | N. HELIX LENGTH | O. HELIX START RESIDUE # | P. HELIX END RESIDUE # |
|-------------|-------------------------------------|--------------------------------------|-----------------|--------------------------|------------------------|
| 2O8F        | i; i+5;                             | 19                                   | 20              | 1221                     | 1240                   |
| 2OBH        | i; i+3; i+7; i+8;                   | 9                                    | 15              | 848                      | 862                    |
| 2ODE        | i; i+3; i+6;                        | 12                                   | 10              | 205                      | 214                    |
| 2ONL        | i; i+3; i+4; i+10;                  | 6                                    | 21              | 124                      | 144                    |
| 2OZA        | i; i+3; i+6;                        | 8                                    | 21              | 124                      | 144                    |
| 2P1L        | i; i+4; i+5; i+9; i+11;             | 8                                    | 21              | 106                      | 126                    |
| 2P1N        | i; i+6;                             | 15                                   | 14              | 146                      | 159                    |
| 2P22        | i; i+11; i+16; i+18;                | 8                                    | 30              | 323                      | 352                    |
| 2P22        | i; i+3; i+4; i+19;                  | 6                                    | 25              | 147                      | 171                    |
| 2PBI        | i; i+3; i+4; i+6;                   | 9                                    | 15              | 240                      | 254                    |
| 2PBI        | i; i+2; i+3; i+7;                   | 15                                   | 17              | 219                      | 235                    |
| 2PRG        | i; i+1; i+4; i+5;                   | 8                                    | 8               | 631                      | 638                    |
| 2PSM        | i; i+2; i+3; i+6; i+7;              | 19                                   | 19              | 36                       | 54                     |
| 2PV2        | i; i+1; i+4; i+5; i+7;              | 8                                    | 9               | 3                        | 11                     |
| 2Q00        | i; i+10; i+13; i+14;                | 6                                    | 33              | 25                       | 57                     |
| 2QB0        | i; i+4; i+5;                        | 12                                   | 8               | 67                       | 74                     |
| 2QL2        | i; i+4; i+8; i+10; i+11; i+14;      | 16                                   | 19              | 139                      | 157                    |
| 2QXV        | i; i+4; i+7; i+10; i+14; i+18;      | 19                                   | 23              | 41                       | 63                     |
| 2RGN        | i; i+1; i+5;                        | 12                                   | 21              | 210                      | 230                    |
| 2ROC        | i; i+3; i+5; i+7; i+11;             | 21                                   | 25              | 131                      | 155                    |
| 2ROD        | i; i+4; i+7; i+9; i+15;             | 9                                    | 19              | 22                       | 40                     |
| 2SIV        | i; i+11;                            | 13                                   | 32              | 629                      | 660                    |
| 2UXN        | i; i+4; i+12; i+20;                 | 7                                    | 40              | 474                      | 513                    |
| 2V6X        | i; i+4; i+6;                        | 15                                   | 31              | 50                       | 80                     |
| 2VE7        | i; i+3; i+4; i+11; i+14;            | 8                                    | 29              | 114                      | 142                    |
| 2VOF        | i; i+4; i+8; i+9; i+11; i+13; i+15; | 17                                   | 20              | 133                      | 152                    |
| 2VOI        | i; i+4; i+8; i+13;                  | 15                                   | 21              | 79                       | 99                     |
| 2W85        | i; i+5;                             | 9                                    | 11              | 102                      | 112                    |
| 2Z2S        | i; i+2; i+8;                        | 16                                   | 19              | 23                       | 41                     |
| 2Z2T        | i; i+1; i+4; i+7;                   | 14                                   | 34              | 2547                     | 2580                   |
| 2Z2T        | i; 18; 21;                          | 6                                    | 35              | 3547                     | 3581                   |
| 3B9F        | i; i+2; i+3; i+7;                   | 8                                    | 9               | 14                       | 14                     |
| 3BC1        | i; i+3; i+6; i+10; i+17;            | 9                                    | 29              | 7                        | 35                     |
| 3BL2        | i; i+4; i+5; i+9; i+11;             | 8                                    | 17              | 107                      | 123                    |
| 3BOW        | i; i+3; i+6;                        | 9                                    | 9               | 652                      | 660                    |
| 3BPL        | i; i+4; i+7; i+10;                  | 21                                   | 26              | 70                       | 95                     |
| 3BPQ        | i; i+2; i+3; i+7; i+11;             | 8                                    | 22              | 14                       | 35                     |
| 3BXK        | i; i+1; i+4; i+6; 11; 12;           | 21                                   | 16              | 1961                     | 1976                   |
| 3C4M        | i; i+3; i+4; i+8;                   | 8                                    | 19              | 16                       | 34                     |
| 3DI2        | i; i+5; i+6; i+8;                   | 9                                    | 18              | 9                        | 26                     |
| 3DVU        | i; i+4; i+9; i+11;                  | 8                                    | 18              | 108                      | 125                    |
| 3E95        | i; i+3; i+4; i+6; i+10;             | 18                                   | 15              | 26                       | 40                     |
| 3EX7        | i; i+3; i+4; i+7;                   | 8                                    | 12              | 385                      | 396                    |
| 3FAL        | i; i+13;                            | 12                                   | 30              | 399                      | 428                    |
| 3GJX        | i; i+7;                             | 8                                    | 22              | 510                      | 531                    |
| 3HHR        | i; i+3; i+4; i+8;                   | 7                                    | 28              | 6                        | 33                     |
| 3HJW        | i; i+1; i+4; i+5;                   | 11                                   | 12              | 42                       | 53                     |

TABLE S2

Bullock, et. al

| A. PDB<br>CODE | Q. HELIX SEQUENCE                     | R. RESOLUTION |
|----------------|---------------------------------------|---------------|
| 2O8F           | TFDGTAIANAVVKELAETIK                  | 3.25          |
| 2OBH           | WKLLAKGLLIRERLK                       | 1.80          |
| 2ODE           | RSERKKWIHC                            | 1.90          |
| 2ONL           | DDHVQFLIYQILRGLKYIHS                  | 4.00          |
| 2OZA           | DDHVQFLIYQILRGLKYIHS                  | 2.70          |
| 2P1L           | SGTMENLSRRLKVTGDLFDIM                 | 2.50          |
| 2P1N           | EEEEVRRENQWAF                         | 2.50          |
| 2P22           | DGLNQLYNLVAQDYALDTIECLSRMLHRG         | 2.70          |
| 2P22           | DIALKKKLEQNTKKLDEESSQLETT             | 2.70          |
| 2PBI           | SSVSLGGIVKYSEQF                       | 1.95          |
| 2PBI           | VTAVRKEIMYYQQALMR                     | 1.95          |
| 2PRG           | HKLVQLLT                              | 2.30          |
| 2PSM           | KVTAMNCFLELQVILHEY                    | 2.19          |
| 2PV2           | TLKFDIFR                              | 1.30          |
| 2Q00           | KSELEALAVSAIREHRRLWADQAVYEEWLRAS      | 2.00          |
| 2QB0           | KEDFRYRS                              | 2.56          |
| 2QL2           | KIETLRLAKNYIWALSEIL                   | 2.50          |
| 2QXV           | MFSSNRQKILERTEITLNQEWKQR              | 1.82          |
| 2RGN           | IQIYEWHRDYFLQELQRCLK                  | 3.50          |
| 2ROC           | EEWAREIGAQLRRIADDLNAQYERR             | NOT APP       |
| 2ROD           | EFAAQLRKIGDKVYCTWSA                   | NOT APP       |
| 2SIV           | QEWERKVDLEENITALLEEAQIQEKNMYEL        | 2.20          |
| 2UXN           | ITAFLVKSKHRDLTALCKEYDELAETQGKLEEKLEEA | 2.72          |
| 2V6X           | PKSKDLIRAKFTEYLNRAEQLKKHLESEEEAN      | 1.98          |
| 2VE7           | AKRTSRFLSGIINFIFHREACRETYMEFL         | 2.88          |
| 2VOF           | WAREIGAQLRRIADDLNAQY                  | 1.80          |
| 2VOI           | QEEIHNARHLAQIGDEMDH                   | 2.10          |
| 2W85           | QEKFFQELFDS                           | NOT APP       |
| 2Z2S           | EAAFAELFQHFAPKVKGFL                   | 2.70          |
| 2Z2T           | DIVQQNNLLRAIEAQQHLLQLTVWGIKQLQARI     | 2.10          |
| 2Z2T           | DIVQQNNLLRAIEAQQHLLQLTVWGIKQLQARIL    | 2.10          |
| 3B9F           | ERELLESYI                             | 1.60          |
| 3BC1           | PEFEEQEAIMKVLQRDAALKRAEEERVH          | 1.80          |
| 3BL2           | MENLSRRLKVTGDLFDI                     | 2.30          |
| 3BOW           | PIDALSEDL                             | 2.40          |
| 3BPL           | AQQFHRHKQLIRFLKRLDRNLWGLAG            | 2.93          |
| 3BPQ           | RKEYEKIEEILDIGLAKAMEET                | 2.20          |
| 3BXK           | IYAAMMIMEYYRQSKA                      | 2.55          |
| 3C4M           | NSMERVEWLRKKLQDVHNF                   | 1.95          |
| 3DI2           | GKQYESVLMVSIQQLDS                     | 2.70          |
| 3DVU           | TMENLSRRLKVTGDLFDI                    | 2.50          |
| 3E95           | RSFRLLELDERGQKG                       | 2.50          |
| 3EX7           | DIRILRDIEQYY                          | 2.30          |
| 3FAL           | PLMFPRLMKLVSLRTLSSVHSEQVFALRL         | 2.36          |
| 3GJX           | EEDEKRFLVTVIKDLLGLCEQK                | 2.50          |
| 3HHR           | LSRLFDNAMLRAHRLHQLAFDITYQEFEE         | 2.80          |
| 3HJW           | GEYRRRWKREVL                          | 2.35          |

**Table S3.** Dataset of HIP interactions with hotspots on three helical faces

## Description of Entries:

- A. PDB code of predicted target.
- B. Chains in the complex featuring a helix at the interface.
- C. Candidate helix to be mimicked is part of the indicated chain.
- D. Title of PDB entry.
- E. Function of protein complex.
- F.  $\Delta\Delta G_{\text{avg}}/\text{helix}$  is derived from Rosetta computational alanine mutagenesis studies and indicates the average free energy penalty for mutating two or more key residues in the helix at the interface to alanine.
- G.  $\Delta\Delta G_{\text{sum}}/\text{helix}$  is derived from Rosetta computational alanine mutagenesis studies and indicates the average free energy penalty for mutating two or more key residues at the interface to alanine.
- H.  $\Delta\Delta G_{\text{sum}}/\text{chain}$  is derived from Rosetta computational alanine mutagenesis studies and indicates the sum free energy penalty for mutating two or more key residues in the helix at the interface to alanine.
- I. Helix contribution refers to the proportion of key contact residues positioned on the candidate helix as compared to the chain (see text for a detailed explanation).
- J. Number of hot spot residues in helix.
- K. Relative positioning of the hot spot residues on a helix.
- L. Hot spot residues derived from Rosetta computational alanine scanning mutagenesis.
- M. Number of residues separating end hot spot residues (see Methods for more details).
- N. Length of candidate helix to be mimicked.
- O. First residue of the candidate helix segment.
- P. Last residue of the candidate helix segment.
- Q. Sequence of candidate helix to be mimicked.
- R. Resolution of PDB structure (NOT APP indicates NMR structure).

| A. PDB<br>CODE | B. INTERFACE<br>CHAINS | C. CHAIN | D. TITLE                                                                          |
|----------------|------------------------|----------|-----------------------------------------------------------------------------------|
| 1FQV           | A B                    | A        | INSIGHTS INTO SCF UBIQUITIN LIGASES FROM THE STRUCTURE OF THE SKP1-SKP2 COMPLEX   |
| 2ZFD           | A B                    | B        | THE CRYSTAL STRUCTURE OF PLANT SPECIFIC CALCIUM BINDING PROTEIN ATCBL2 IN COMPLEX |
| 1CDL           | A E                    | E        | TARGET ENZYME RECOGNITION BY CALMODULIN: 2.4 ANGSTROMS STRUCTURE OF A CALMODU     |
| 1E3A           | A B                    | A        | A SLOW PROCESSING PRECURSOR PENICILLIN ACYLASE FROM ESCHERICHIA COLI              |
| 1E3A           | A B                    | A        | A SLOW PROCESSING PRECURSOR PENICILLIN ACYLASE FROM ESCHERICHIA COLI              |
| 1IHF           | A B                    | B        | INTEGRATION HOST FACTOR/DNA COMPLEX                                               |
| 1JFI           | B C                    | B        | CRYSTAL STRUCTURE OF THE NC2-TBP-DNA TERNARY COMPLEX                              |
| 1MXE           | A E                    | E        | STRUCTURE OF THE COMPLEX OF CALMODULIN WITH THE TARGET SEQUENCE OF CAMKI          |
| 1N1J           | A B                    | B        | CRYSTAL STRUCTURE OF THE NF-YB/NF-YC HISTONE PAIR                                 |
| 1N2D           | A C                    | C        | TERNARY COMPLEX OF MLC1P BOUND TO IQ2 AND IQ3 OF MYO2P, A CLASS V MYOSIN          |
| 1OR7           | A C                    | C        | CRYSTAL STRUCTURE OF ESCHERICHIA COLI SIGMAE WITH THE CYTOPLASMIC DOMAIN OF ITS . |
| 1PQ1           | A B                    | B        | CRYSTAL STRUCTURE OF BCL-XL/BIM                                                   |
| 1RP3           | E F                    | E        | COCRYSTAL STRUCTURE OF THE FLAGELLAR SIGMA/ANTI-SIGMA COMPLEX, SIGMA-28/FLGM      |
| 1ZUZ           | A B                    | B        | CALMODULIN IN COMPLEX WITH A MUTANT PEPTIDE FROM HUMAN DRP- 1 KINASE              |
| 2BCX           | A B                    | B        | CRYSTAL STRUCTURE OF CALMODULIN IN COMPLEX WITH A RYANODINE RECEPTOR PEPTIDE      |
| 2BE6           | B E                    | E        | 2.0 A CRYSTAL STRUCTURE OF THE CAV1.2 IQ DOMAIN-CA/CAM COMPLEX                    |
| 2F66           | A C                    | A        | STRUCTURE OF THE ESCRT-I ENDOSOMAL TRAFFICKING COMPLEX                            |
| 2F66           | A C                    | C        | STRUCTURE OF THE ESCRT-I ENDOSOMAL TRAFFICKING COMPLEX                            |
| 2FOT           | A C                    | C        | CRYSTAL STRUCTURE OF THE COMPLEX BETWEEN CALMODULIN AND ALPHAI1-SPECTRIN          |
| 2JF9           | B Q                    | Q        | ESTROGEN RECEPTOR ALPHA LBD IN COMPLEX WITH A TAMOXIFEN- SPECIFIC PEPTIDE ANTAGO  |
| 2O60           | A B                    | B        | CALMODULIN BOUND TO PEPTIDE FROM NEURONAL NITRIC OXIDE SYNTHASE                   |
| 2PQK           | A B                    | B        | X-RAY CRYSTAL STRUCTURE OF HUMAN MCL-1 IN COMPLEX WITH BIM BH3                    |
| 2QAC           | A T                    | T        | THE CLOSED MTIP-MYOSINA-TAIL COMPLEX FROM THE MALARIA PARASITE INVASION MACHINI   |
| 2V6Q           | A B                    | B        | CRYSTAL STRUCTURE OF A BHRF-1 : BIM BH3 COMPLEX                                   |
| 3BS5           | A B                    | B        | CRYSTAL STRUCTURE OF HCNK2-SAM/DHYP-SAM COMPLEX                                   |
| 3D7V           | A B                    | B        | CRYSTAL STRUCTURE OF MCL-1 IN COMPLEX WITH AN MCL-1 SELECTIVE BH3 LIGAND          |
| 3DA7           | G H                    | H        | A CONFORMATIONALLY STRAINED, CIRCULAR PERMUTANT OF BARNASE                        |
| 3DD7           | C D                    | D        | STRUCTURE OF DOCH66Y IN COMPLEX WITH THE C-TERMINAL DOMAIN OF PHD                 |
| 3DI2           | C D                    | C        | CRYSTAL STRUCTURE OF THE COMPLEX OF HUMAN INTERLEUKIN-7 WITH UNGLYCOSYLATED H     |
| 3DVE           | A B                    | B        | CRYSTAL STRUCTURE OF CA2+/CAM-CAV2.2 IQ DOMAIN COMPLEX                            |
| 3EAB           | D J                    | J        | CRYSTAL STRUCTURE OF SPASTIN MIT IN COMPLEX WITH ESCRT III                        |
| 3FWB           | A B                    | B        | SAC3:SUS1:CDC31 COMPLEX                                                           |

TABLE S3

Bullock, et. al

| A. PDB<br>CODE | E. FUNCTION                        | F. $\Delta\Delta G_{AVG,HELIX}$<br>(KCAL/MOL) | G. $\Delta\Delta G_{SUM,HELIX}$<br>(KCAL/MOL) | H. $\Delta\Delta G_{SUM,CHAIN}$<br>(KCAL/MOL) | I. HELIX<br>CONTRIBUTION |
|----------------|------------------------------------|-----------------------------------------------|-----------------------------------------------|-----------------------------------------------|--------------------------|
| 1FQV           | LIGASE                             | 2.0                                           | 8.1                                           | 11.7                                          | 69%                      |
| 2ZFD           | SIGNALING PROTEIN/TRANSFERASE      | 2.8                                           | 11.1                                          | 23.2                                          | 48%                      |
| 1CDL           | CALCIUM-BINDING PROTEIN            | 2.4                                           | 21.8                                          | 23.3                                          | 94%                      |
| 1E3A           | ANTIBIOTIC RESISTANCE              | 2.4                                           | 11.9                                          | 110.8                                         | 11%                      |
| 1E3A           | ANTIBIOTIC RESISTANCE              | 2.8                                           | 19.7                                          | 110.8                                         | 18%                      |
| 1IHF           | TRANSCRIPTION/DNA                  | 2.4                                           | 11.9                                          | 32.3                                          | 37%                      |
| 1JFI           | TRANSCRIPTION/DNA                  | 2.7                                           | 8.1                                           | 8.1                                           | 100%                     |
| 1MXE           | METAL BINDING PROTEIN              | 2.4                                           | 23.8                                          | 27.5                                          | 87%                      |
| 1N1J           | DNA BINDING PROTEIN                | 2.5                                           | 17.2                                          | 43.7                                          | 39%                      |
| 1N2D           | CELL CYCLE                         | 2.0                                           | 15.7                                          | 15.7                                          | 100%                     |
| 1OR7           | TRANSCRIPTION                      | 2.2                                           | 11.1                                          | 33.3                                          | 33%                      |
| 1PQ1           | APOPTOSIS                          | 2.3                                           | 20.4                                          | 20.4                                          | 100%                     |
| 1RP3           | TRANSCRIPTION                      | 2.0                                           | 10.0                                          | 25.0                                          | 40%                      |
| 1ZUZ           | METAL BINDING PROTEIN/TRANSFERASE  | 2.6                                           | 21.1                                          | 22.7                                          | 93%                      |
| 2BCX           | CALCIUM BINDING PROTEIN            | 2.2                                           | 15.1                                          | 15.1                                          | 100%                     |
| 2BE6           | MEMBRANE PROTEIN                   | 2.1                                           | 14.9                                          | 14.9                                          | 100%                     |
| 2F66           | TRANSPORT PROTEIN                  | 3.4                                           | 10.2                                          | 11.3                                          | 90%                      |
| 2F66           | TRANSPORT PROTEIN                  | 2.6                                           | 20.5                                          | 21.5                                          | 95%                      |
| 2FOT           | METAL BINDING, STRUCTURAL PROTEIN  | 2.9                                           | 20.3                                          | 20.3                                          | 100%                     |
| 2JF9           | TRANSCRIPTION                      | 2.2                                           | 10.9                                          | 10.9                                          | 100%                     |
| 2O60           | METAL BINDING PROTEIN              | 2.5                                           | 25.1                                          | 25.1                                          | 100%                     |
| 2PQK           | APOPTOSIS                          | 2.2                                           | 20.0                                          | 21.1                                          | 95%                      |
| 2QAC           | MEMBRANE PROTEIN                   | 2.3                                           | 18.0                                          | 18.0                                          | 100%                     |
| 2V6Q           | APOPTOSIS                          | 2.1                                           | 12.7                                          | 12.7                                          | 100%                     |
| 3BS5           | SIGNALING PROTEIN/MEMBRANE PROTEIN | 2.3                                           | 11.5                                          | 11.5                                          | 100%                     |
| 3D7V           | APOPTOSIS                          | 2.4                                           | 17.1                                          | 17.1                                          | 100%                     |
| 3DA7           | PROTEIN BINDING                    | 2.7                                           | 13.7                                          | 18.3                                          | 75%                      |
| 3DD7           | RIBOSOME INHIBITOR                 | 4.9                                           | 24.4                                          | 26.6                                          | 92%                      |
| 3DI2           | CYTOKINE/CYTOKINE RECEPTOR         | 2.1                                           | 6.4                                           | 9.2                                           | 70%                      |
| 3DVE           | MEMBRANE PROTEIN                   | 2.6                                           | 18.1                                          | 20.0                                          | 91%                      |
| 3EAB           | CELL CYCLE                         | 2.1                                           | 10.6                                          | 12.1                                          | 88%                      |
| 3FWB           | CELL CYCLE, TRANSCRIPTION          | 3.3                                           | 19.9                                          | 19.9                                          | 100%                     |



| A. PDB<br>CODE | J. # HOTSPOT<br>RESIDUES | K. HOTSPOT RESIDUES, RESIDUE #<br>$\Delta\Delta G_{(KCAL/MOL)}$                                               |
|----------------|--------------------------|---------------------------------------------------------------------------------------------------------------|
| 1FQV           | 4                        | K137, 1.9; R138, 1.2; W139, 2.5; Y140, 2.5;                                                                   |
| 2ZFD           | 4                        | F313, 5.1; D314, 1.0; I315, 2.1; I316, 2.9;                                                                   |
| 1CDL           | 9                        | R798, 2.1; K799, 2.2; W800, 7.1; H805, 2.3; V807, 2.1; R808, 2.1; I810, 1.2; R812, 1.3; L813, 1.4;            |
| 1E3A           | 5                        | E152, 3.2; I153, 2.1; D154, 1.7; N155, 2.6; L158, 2.3;                                                        |
| 1E3A           | 7                        | W25, 3.5; L27, 3.0; F28, 1.9; Y29, 1.2; Y31, 6.1; Y33, 2.3; D38, 1.7;                                         |
| 1IHF           | 5                        | E28, 4.2; M29, 1.9; L30, 2.3; H32, 2.3; M33, 1.2;                                                             |
| 1JFI           | 3                        | L219, 1.1; Q222, 1.2; L225, 5.8;                                                                              |
| 1MXE           | 10                       | F298, 2.8; K302, 1.6; W303, 6.9; K304, 1.1; F307, 2.6; V312, 1.4; V313, 1.6; R314, 2.1; H315, 1.8; M316, 1.9; |
| 1N1J           | 7                        | V67, 1.1; L68, 2.7; F69, 4.7; K71, 1.5; I75, 1.3; I77, 3.0; W85, 2.9;                                         |
| 1N2D           | 8                        | K812, 1.4; L814, 2.5; Q815, 2.8; I818, 1.7; F821, 2.4; I822, 1.4; I823, 1.1; R824, 2.4;                       |
| 1OR7           | 5                        | W33, 2.8; H37, 2.4; L38, 1.2; I39, 2.4; M43, 2.3;                                                             |
| 1PQ1           | 9                        | F101, 4.3; Y105, 2.8; E87, 1.7; I90, 1.5; E93, 1.0; L94, 1.9; R95, 1.6; I97, 2.0; D99, 3.6;                   |
| 1RP3           | 5                        | K190, 1.8; Q194, 2.1; L195, 1.2; F197, 2.4; Y198, 2.5;                                                        |
| 1ZUZ           | 8                        | R304, 1.9; W305, 6.6; L307, 1.6; F309, 3.2; V312, 2.2; L314, 1.6; H317, 2.3; L318, 1.7;                       |
| 2BCX           | 7                        | L3623, 2.3; K3626, 1.0; R3628, 2.7; R3629, 1.6; V3632, 1.5; V3633, 1.8; F3636, 4.2;                           |
| 2BE6           | 7                        | T1614, 1.3; K1617, 1.5; F1618, 4.5; Y1619, 1.6; F1622, 2.6; L1623, 1.0; I1624, 2.4;                           |
| 2F66           | 3                        | V332, 2.4; D340, 6.5; M348, 1.3;                                                                              |
| 2F66           | 8                        | F184, 1.0; I185, 1.7; Y188, 4.9; L189, 1.7; R192, 4.1; H196, 2.4; L197, 2.4; E200, 2.3;                       |
| 2FOT           | 7                        | W1192, 4.5; R1196, 2.1; L1197, 2.8; V1199, 2.3; T1204, 1.2; F1205, 4.4; K1209, 3.0;                           |
| 2JF9           | 5                        | L12, 2.1; R5, 1.0; W7, 2.8; F8, 4.0; K9, 1.0;                                                                 |
| 2O60           | 10                       | L10, 4.5; E12, 1.0; V14, 2.1; K15, 1.0; F16, 3.9; K19, 1.0; L20, 2.0; F7, 5.0; K8, 1.4; K9, 3.2;              |
| 2PQK           | 9                        | L10, 2.2; R11, 3.2; I13, 2.2; D15, 2.7; F17, 2.7; Y21, 2.2; E3, 1.8; W5, 1.0; I6, 2.0;                        |
| 2QAC           | 8                        | R806, 4.3; V807, 1.7; Q808, 2.2; H810, 3.4; I811, 2.3; R812, 1.1; K813, 2.0; V816, 1.0;                       |
| 2V6Q           | 6                        | W57, 2.2; I58, 1.8; E61, 3.1; L62, 2.3; R63, 1.4; F69, 1.9;                                                   |
| 3BS5           | 5                        | I165, 1.7; H167, 2.9; Q168, 1.6; L170, 3.2; E173, 2.1;                                                        |
| 3D7V           | 7                        | E55, 2.7; W57, 1.0; I58, 3.3; R63, 2.7; I65, 2.4; D67, 2.9; Y73, 2.1;                                         |
| 3DA7           | 5                        | L35, 1.6; D36, 1.5; D40, 6.7; C41, 1.0; W45, 2.9;                                                             |
| 3DD7           | 5                        | E55, 1.6; F56, 2.6; L59, 2.0; F60, 17.0; D61, 1.2;                                                            |
| 3DI2           | 3                        | D74, 1.0; L77, 1.4; L80, 4.0;                                                                                 |
| 3DVE           | 7                        | M1854, 1.5; K1856, 1.6; I1863, 3.1; F1864, 1.9; F1866, 3.9; Y1867, 4.3; K1868, 1.8;                           |
| 3EAB           | 5                        | E184, 2.9; Q185, 3.7; D186, 1.1; L188, 1.9; R191, 1.0;                                                        |
| 3FWB           | 6                        | K789, 1.7; L794, 1.0; K795, 3.5; F798, 1.3; F799, 4.1; W802, 8.3;                                             |

TABLE S3

Bullock, et. al

| A. PDB<br>CODE | L. HOTSPOT RESIDUE<br>HELIX POSITIONS                | M. HOTSPOT RESIDUE<br>END TO END LENGTH | N. HELIX<br>LENGTH | O. HELIX START<br>RESIDUE # |
|----------------|------------------------------------------------------|-----------------------------------------|--------------------|-----------------------------|
| 1FQV           | i; i+1; i+2; i+3;                                    | 5                                       | 8                  | 137                         |
| 2ZFD           | i; i+1; i+2; i+3;                                    | 2                                       | 7                  | 312                         |
| 1CDL           | i; i+1; i+2; i+7; i+9; i+10; i+12; i+14; i+15;       | 12                                      | 17                 | 798                         |
| 1E3A           | i; i+1; i+2; i+3; i+6;                               | 19                                      | 15                 | 152                         |
| 1E3A           | i; i+2; i+3; i+4; i+6; i+8; i+13;                    | 18                                      | 16                 | 24                          |
| 1IHF           | i; i+1; i+2; i+4; i+5;                               | 9                                       | 21                 | 19                          |
| 1JFI           | i; i+3; i+6;                                         | 12                                      | 28                 | 215                         |
| 1MXE           | i; i+4; i+5; i+6; i+9; i+14; i+15; i+16; i+17; i+18; | 9                                       | 21                 | 298                         |
| 1N1J           | i; i+1; i+2; i+4; i+8; i+10; i+18;                   | 8                                       | 29                 | 63                          |
| 1N2D           | i; i+2; i+3; i+6; i+9; i+10; i+11; i+12;             | 19                                      | 46                 | 808                         |
| 1OR7           | i; i+4; i+5; i+6; i+10;                              | 11                                      | 18                 | 27                          |
| 1PQ1           | i; i+3; i+6; i+7; i+8; i+10; i+12; i+14; i+18;       | 8                                       | 27                 | 86                          |
| 1RP3           | i; i+4; i+5; i+7; i+8;                               | 7                                       | 13                 | 187                         |
| 1ZUZ           | i; i+1; i+3; i+5; i+8; i+10; i+13; i+14;             | 9                                       | 16                 | 304                         |
| 2BCX           | i; i+3; i+5; i+6; 10; 11; 14;                        | 7                                       | 23                 | 3617                        |
| 2BE6           | i; i+3; i+4; i+5; i+8; 10; 11;                       | 15                                      | 13                 | 1613                        |
| 2F66           | i; i+8; i+16;                                        | 12                                      | 29                 | 323                         |
| 2F66           | i; i+1; i+4; i+5; i+8; i+12; i+13; i+16;             | 11                                      | 26                 | 178                         |
| 2FOT           | i; i+4; i+5; i+7; 13; 14; 18;                        | 8                                       | 21                 | 1191                        |
| 2JF9           | i; i+2; i+3; i+4; i+7;                               | 8                                       | 9                  | 5                           |
| 2O60           | i; i+1; i+2; i+3; i+5; i+7; i+8; i+9; i+12; i+13;    | 17                                      | 15                 | 7                           |
| 2PQK           | i; i+2; i+3; i+7; i+8; i+10; i+12; i+14; i+18;       | 8                                       | 22                 | 1                           |
| 2QAC           | i; i+1; i+2; i+4; i+5; i+6; i+7; i+10;               | 15                                      | 13                 | 805                         |
| 2V6Q           | i; i+1; i+4; i+5; i+6; i+12;                         | 14                                      | 19                 | 53                          |
| 3BS5           | i; i+2; i+3; i+5; i+8;                               | 14                                      | 19                 | 165                         |
| 3D7V           | i; i+2; i+3; i+8; i+10; i+12; i+18;                  | 8                                       | 22                 | 54                          |
| 3DA7           | i; i+1; i+5; i+10;                                   | 8                                       | 12                 | 35                          |
| 3DD7           | i; i+1; i+4; i+5; i+6;                               | 8                                       | 11                 | 53                          |
| 3DI2           | i; i+3; i+6;                                         | 8                                       | 18                 | 74                          |
| 3DVE           | i; i+2; i+9; i+10; i+12; i+13; i+14;                 | 12                                      | 17                 | 1854                        |
| 3EAB           | i; i+1; i+2; i+4; i+7;                               | 9                                       | 19                 | 174                         |
| 3FWB           | i; i+5; i+6; i+9; i+10; i+13;                        | 6                                       | 52                 | 753                         |

TABLE S3

Bullock, et. al

| A. PDB<br>CODE | P. HELIX END<br>RESIDUE # | Q. HELIX SEQUENCE                                    | R. RESOLUTION |
|----------------|---------------------------|------------------------------------------------------|---------------|
| 1FQV           | 144                       | KRWYRLAS                                             | 2.80          |
| 2ZFD           | 318                       | AFDIISG                                              | 1.20          |
| 1CDL           | 814                       | RKWQKTGHAVRAIGRLS                                    | 2.00          |
| 1E3A           | 166                       | EIDNLALLTALKDKY                                      | 1.80          |
| 1E3A           | 39                        | TWHLFYGYGYVVAQDR                                     | 1.80          |
| 1IHF           | 39                        | AKTVEDAVKEMLEHMASTLAQ                                | 2.20          |
| 1JFI           | 242                       | EEELLRQQQLFAKARQQQAELAQEWL                           | 2.62          |
| 1MXE           | 318                       | FAKSKWKQAFNATAVVRHMRK                                | 1.70          |
| 1N1J           | 91                        | AEAPVLFKAAQIFITELTLRAWIHTEDN                         | 1.67          |
| 1N2D           | 853                       | SQAIKYLQNNIKGFIRQRVNDEMKNVCATLLQAAYRGHSIRANVF        | 2.00          |
| 1OR7           | 44                        | PEMQKTWESYHLIRDSMR                                   | 2.00          |
| 1PQ1           | 112                       | PEIRIAQELRRIGDEFNETYTRRVFAN                          | 1.65          |
| 1RP3           | 199                       | EREKLVQLIFYE                                         | 2.30          |
| 1ZUZ           | 319                       | RWKLDIFSIVSLCNHLT                                    | 1.91          |
| 2BCX           | 3639                      | KAVWHKLLSKQRRRAVVACFRMT                              | 2.00          |
| 2BE6           | 1625                      | VTVGKIFYATFLIQ                                       | 2.00          |
| 2F66           | 351                       | DGLNQLYNLVAQDYALTDTIEALSRMLHR                        | 2.80          |
| 2F66           | 203                       | ADDLDQFIKNYLDIRTQYHLRREKLA                           | 2.80          |
| 2FOT           | 1211                      | PWKSARLMVHTVATFNSIKER                                | 2.45          |
| 2JF9           | 13                        | REWFKDMLS                                            | 2.10          |
| 2O60           | 21                        | FKKLAEAVKFSAKLM                                      | 1.55          |
| 2PQK           | 22                        | RPEIWIAQELRRIGDEFNAYYA                               | 2.00          |
| 2QAC           | 817                       | MRVQAHIRKRMVA                                        | 1.70          |
| 2V6Q           | 71                        | RPEIWIAQELRRIGDEFNA                                  | 2.70          |
| 3BS5           | 183                       | IGHQELILEAVDLLCALNY                                  | 2.00          |
| 3D7V           | 75                        | PEIWIAQEARRIGDEANAYYAR                               | 2.03          |
| 3DA7           | 46                        | LDALWDCLTGWV                                         | 2.25          |
| 3DD7           | 63                        | DAEFASLFDTL                                          | 1.70          |
| 3DI2           | 123                       | DFDLHLLKVSEGTILLK                                    | 2.70          |
| 3DVE           | 1870                      | MGKVYAALMIFDFYKQN                                    | 2.35          |
| 3EAB           | 192                       | GSVGTSVASAEQDELSQRL                                  | 2.50          |
| 3FWB           | 804                       | EANYRKDFIDTMTRELYDAFLHERLYLIYMDSRAELKRNSTLKKKFFEKWQA | 2.50          |
